# Supplementary material for: Variation in alternative splicing across human tissues
Source: PubMed Central journal article supplement (PMC545594; doi:10.1186/gb-2004-5-10-r74), 2004-09-13
Supplement: gb-2004-5-10-r74-s2.pdf [file gb-2004-5-10-r74-s2.pdf]

| <b>Normal tissues</b> | <b>Average number of genes</b> | <b>Average number of AS genes</b> | <b>Average number of genes with skipped exons</b> | <b>Average number of genes with alternative 5'ss exons</b> | <b>Average number of genes with alternative 3'ss exons</b> |
|-----------------------|--------------------------------|-----------------------------------|---------------------------------------------------|------------------------------------------------------------|------------------------------------------------------------|
| kidney                | 75.9                           | 11.9                              | 8.1                                               | 2.1                                                        | 2.0                                                        |
| pancreas              | 288.7                          | 32.1                              | 21.3                                              | 4.5                                                        | 8.8                                                        |
| testis                | 189.7                          | 44.7                              | 34.1                                              | 6.8                                                        | 8.0                                                        |
| eye-retina            | 267.0                          | 34.9                              | 19.5                                              | 8.7                                                        | 9.0                                                        |
| stomach               | 734.6                          | 90.8                              | 62.0                                              | 12.6                                                       | 24.2                                                       |
| brain                 | 1635.8                         | 423.3                             | 272.9                                             | 102.6                                                      | 108.7                                                      |
| placenta              | 409.4                          | 59.1                              | 36.8                                              | 14.3                                                       | 14.4                                                       |
| breast                | 173.7                          | 15.9                              | 12.1                                              | 2.5                                                        | 2.6                                                        |
| muscle                | 177.1                          | 15.6                              | 12.5                                              | 1.5                                                        | 3.5                                                        |
| uterus                | 71.3                           | 4.2                               | 2.2                                               | 2.0                                                        | 0.0                                                        |
| liver                 | 91.8                           | 26.3                              | 5.6                                               | 13.3                                                       | 13.6                                                       |
| lung                  | 430.7                          | 62.9                              | 41.1                                              | 11.6                                                       | 16.1                                                       |

Table S2. The average total number of genes, AS genes, genes containing skipped, exons, genes containing alternative 5'ss or 3'ss exons. Splicing patterns were inferred utilizing 10 ESTs from genes with at least 15 ESTs from a particular normal tissue cDNA library.
