# Supplementary material for: Variation in alternative splicing across human tissues
Source: PubMed Central journal article supplement (PMC545594; doi:10.1186/gb-2004-5-10-r74), 2004-09-13
Supplement: gb-2004-5-10-r74-s3.pdf [file gb-2004-5-10-r74-s3.pdf]

| AS event | Normal tissue | Disease-associated tissue | Normal and disease |
|----------|---------------|---------------------------|--------------------|
|          | ASG (CSG)     | ASG (CSG)                 | ASG (CSG)          |
| SE       | 195 (1201)    | 275 (1115)                | 261 (1128)         |
| A5E      | 134 (1261)    | 119 (1271)                | 147 (1242)         |
| A3E      | 124 (1271)    | 107 (1266)                | 107 (1282)         |
| ASG      | 382 (1013)    | 435 (947)                 | 435 (954)          |

  

| AS event | Normal tissue   | Disease-associated tissue | Normal and disease |
|----------|-----------------|---------------------------|--------------------|
|          | ASG / (CSG+ASG) | ASG / (CSG+ASG)           | ASG / (CSG+ASG)    |
| SE       | 14%             | 20%                       | 19%                |
| A5E      | 10%             | 9%                        | 11%                |
| A3E      | 9%              | 9%                        | 8%                 |
| ASG      | 27%             | 32%                       | 31%                |

Table S3. The number of alternatively spliced genes (ASGs) and constitutively spliced genes (CSGs), genes containing skipped exons (SEs), alternative 5'ss (A5E), and alternative 3'ss exons. Splicing patterns were inferred by using 16 ESTs per gene from normal cDNA libraries, 16 ESTs per gene from diseased cDNA libraries, and 8 ESTs from normal and 8 ESTs from diseased cDNA libraries. ESTs from the 16 tissue libraries similar to that in Figure 1 were combined in this analysis. The fraction of genes containing SEs using ESTs from normal tissue libraries was significantly smaller ( $p < 1E-5$ ) by a chi-square test (with Yates correction), as compared to using ESTs from disease associated libraries.
