# Supplementary material for: Variation in alternative splicing across human tissues
Source: PubMed Central journal article supplement (PMC545594; doi:10.1186/gb-2004-5-10-r74), 2004-09-13

**Figure S1.** Sampling 10 ESTs from gene regions with at least 15 ESTs aligned the region. ESTs are derived from strictly normal cDNA libraries.

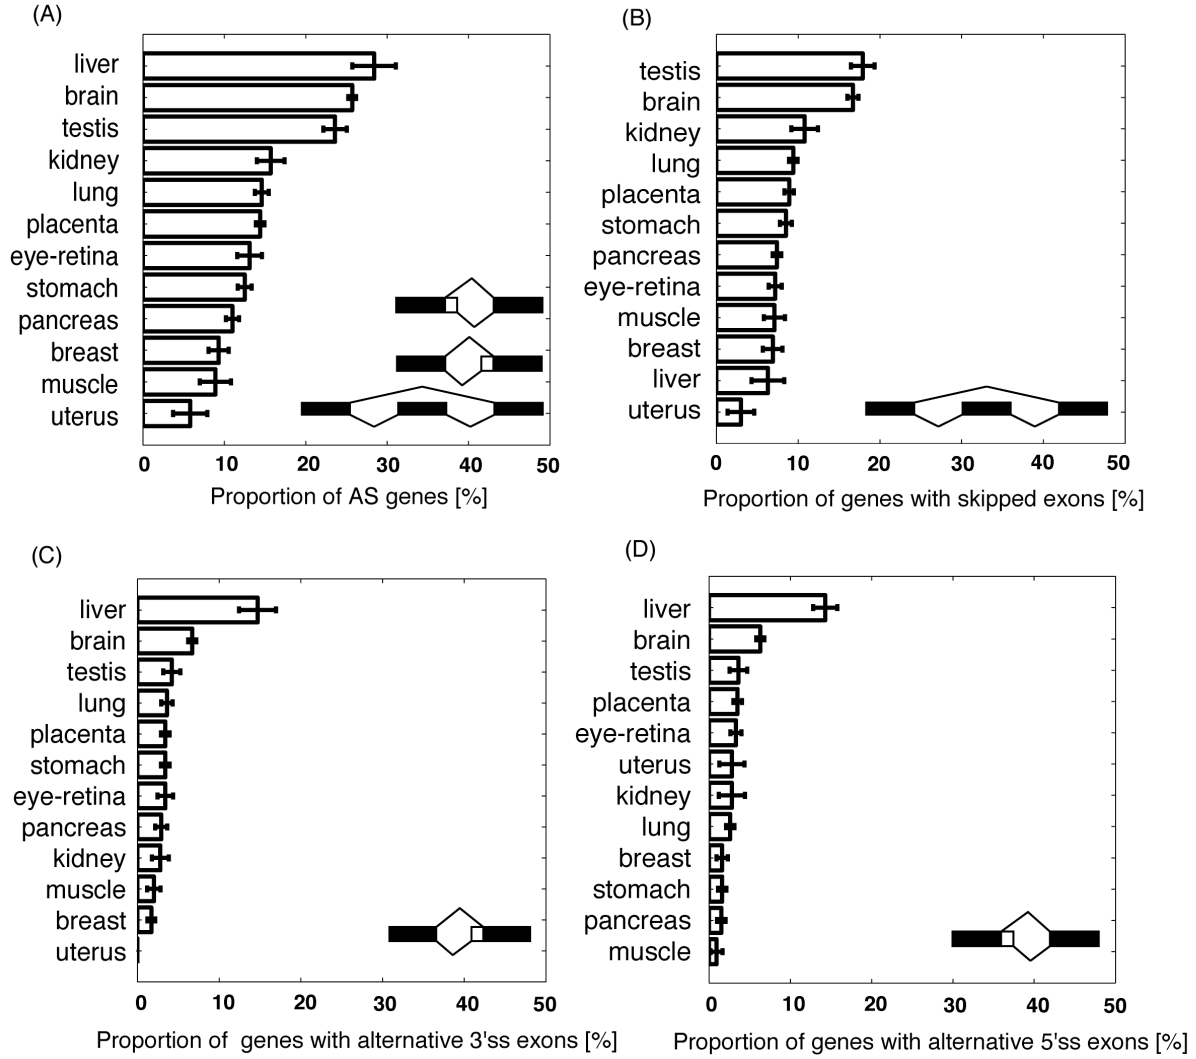

Supplement: gb-2004-5-10-r74-s4.pdf [file gb-2004-5-10-r74-s4.pdf]
