# Supplementary material for: Variation in alternative splicing across human tissues
Source: PubMed Central journal article supplement (PMC545594; doi:10.1186/gb-2004-5-10-r74), 2004-09-13
Supplement: gb-2004-5-10-r74-s5.pdf [file gb-2004-5-10-r74-s5.pdf]

Categories of cDNA libraries and designated tissues, derived from:

- Mammalian Gene Collection (MGC)
- Integrated Molecular Analysis of Genomes and their Expression (IMAGE)
- Cancer Genome Anatomy Project (CGAP).

For each entry in the EST database (dbEST), we extract

- EST identification number "dbEST Id" (e.g., 90695)
- GenBank Accession number (e.g., T39891)
- EST sequence
- cDNA library name "Lib Name" (e.g., Stratagene liver (#937224)).

If the cDNA library has been taken from MGC, IMAGE or CGAP, the library name is matched to the original designated tissue. For instance, EST BE764871 has been derived from the cDNA library NT0086 and was designated as "brain" in CGAP. Cases with nonspecific tissue description (e.g., cDNA library HT29M6) were categorized as "uncharacterized" or "pooled" tissue.

For a flat file containing EST tissue information, please send email to: [holste@mit.edu](mailto:holste@mit.edu).

| cDNA Library                                          | Designated Tissue for Library |
|-------------------------------------------------------|-------------------------------|
| Stratagene liver (#937224)                            | liver                         |
| Stratagene ovary (#937217)                            | ovary                         |
| Soares fetal liver spleen 1NFLS                       | pooled tissue                 |
| Soares infant brain 1NIB                              | brain                         |
| Human fetal brain (TFujiwara)                         | brain                         |
| Human aorta polyA+ (TFujiwara)                        | vascular                      |
| Human placenta polyA+ (TFujiwara)                     | placenta                      |
| Human fetal brain QBoqin                              | uncharacterized tissue        |
| Human hepatoma RHWenger                               | uncharacterized tissue        |
| Human fibroblast cDNA                                 | uncharacterized tissue        |
| Human pancreatic cancer cell line Patu 8988t          | pancreas                      |
| Human frontal cortex, Stratagene                      | uncharacterized tissue        |
| Human vulva squamous carcinoma A431                   | uncharacterized tissue        |
| Human exon amplification Treacher Collins gene region | uncharacterized tissue        |
| multi-tissue normalized short-fragment                | uncharacterized tissue        |
| normal female breast tissue                           | uncharacterized tissue        |
| fetal brain cDNA                                      | uncharacterized tissue        |
| Human fetal brain QBoqin2                             | brain                         |
| Human fovea cDNA                                      | retina                        |
| Chromosome 16p13.3 Exon                               | uncharacterized tissue        |
| Human normal gingiva                                  | uncharacterized tissue        |
| Human pancreatic tumor                                | uncharacterized tissue        |
| Human retina cDNA Tsp509I-cleaved sublibrary          | retina                        |
| Human retina cDNA randomly primed sublibrary          | retina                        |
| Fetal heart                                           | heart                         |
| Human fetal brain, Stratagene                         | uncharacterized tissue        |
| Human PGasparini                                      | uncharacterized tissue        |
| Stratagene fetal spleen (#937205)                     | spleen                        |
| Soares placenta Nb2HP                                 | placenta                      |
| Soares breast 2NbHBst                                 | mammary gland                 |
| Soares breast 3NbHBst                                 | mammary gland                 |
| Soares adult brain N2b4HB55Y                          | brain                         |
| Soares adult brain N2b5HB55Y                          | brain                         |
| Soares retina N2b4HR                                  | retina                        |
| Soares ovary tumor NbHOT                              | ovary                         |
| Weizmann Olfactory Epithelium                         | head and neck                 |
| Soares melanocyte 2NbHM                               | skin                          |
| Morton Fetal Cochlea                                  | ear                           |
| Pancreatic Islet                                      | pancreatic islet              |
| CLONTECH cDNA library CCRF-CEM, cat# HL1063g          | uncharacterized tissue        |

| cDNA Library                                   | Designated Tissue for Library |
|------------------------------------------------|-------------------------------|
| HT29M6                                         | uncharacterized tissue        |
| Human chromosome 17                            | uncharacterized tissue        |
| BATM1                                          | uncharacterized tissue        |
| Human, Meese.E.                                | uncharacterized tissue        |
| Adult heart, Clontech                          | heart                         |
| Outward Alu-primed hncDNA library              | uncharacterized tissue        |
| Inward Alu-primed hncDNA library               | uncharacterized tissue        |
| Human fetal lung                               | lung                          |
| Human adult lung 3' directed Mbol cDNA         | lung                          |
| HDMEC cDNA library                             | vascular                      |
| Subtracted human retina                        | uncharacterized tissue        |
| Selected chromosome 21 cDNA library            | uncharacterized tissue        |
| 22 week old human fetal liver cDNA library     | liver                         |
| Subtractive cDNA library ocular ciliary body   | eye                           |
| Cot1374Ft-4HB3MA                               | uncharacterized tissue        |
| Human chromosome 8                             | uncharacterized tissue        |
| Chromosome 21 exon                             | uncharacterized tissue        |
| Chromosome 19p12-p13.1 exon                    | uncharacterized tissue        |
| Human stem cell                                | uncharacterized tissue        |
| Human fetal brain                              | uncharacterized tissue        |
| human adult testis                             | testis                        |
| Clontech human fetal brain polyA+ mRNA (#6535) | brain                         |
| Clontech human placenta polyA+ mRNA (#6572)    | placenta                      |
| Testis, Subtracted                             | uncharacterized tissue        |
| HE6W                                           | uncharacterized tissue        |
| Human ocular ciliary body cDNA library 1       | uncharacterized tissue        |
| Human ocular ciliary body cDNA library 2       | uncharacterized tissue        |
| Chromosome 21, K.Gardiner                      | uncharacterized tissue        |
| Chromosome 22 exon                             | uncharacterized tissue        |
| 21q Placenta, F.Tassone and K.Gardiner         | uncharacterized tissue        |
| Human chromosome 12p cDNAs                     | uncharacterized tissue        |
| BATM2                                          | uncharacterized tissue        |
| Human thymus NSTH II                           | thymus                        |
| Human normalized K562-cDNA                     | uncharacterized tissue        |
| Human HL60                                     | uncharacterized tissue        |
| HM1                                            | muscle                        |
| Human cerebral cortex                          | cerebrum                      |
| Human                                          | uncharacterized tissue        |
| WATM1                                          | adipose                       |
| Stratagene lung (#937210)                      | lung                          |
| Stratagene placenta (#937225)                  | placenta                      |

| cDNA Library                                               | Designated Tissue for Library |
|------------------------------------------------------------|-------------------------------|
| STRATAGENE Human skeletal muscle cDNA library, cat.#936215 | muscle                        |
| normalized infant brain cDNA                               | brain                         |
| Human Adipose tissue                                       | adipose                       |
| Human Adrenal gland                                        | endocrine                     |
| Human Bone                                                 | bone                          |
| Human Brain                                                | brain                         |
| Human Breast                                               | mammary gland                 |
| Human Colon                                                | colon                         |
| Human Embryo                                               | whole body                    |
| Human Endothelial cells                                    | vascular                      |
| Human Epididymis                                           | genitourinary                 |
| Human Esophagus                                            | uncharacterized tissue        |
| Human Eye                                                  | eye                           |
| Human Gall bladder                                         | uncharacterized tissue        |
| Human Greater omentum                                      | uncharacterized tissue        |
| Human Heart                                                | heart                         |
| Human Kidney                                               | kidney                        |
| Human Liver                                                | liver                         |
| Human Lung                                                 | lung                          |
| Human Lymphoid tissue                                      | uncharacterized tissue        |
| Human Ovary                                                | ovary                         |
| Human Pancreas                                             | pancreas                      |
| Human Parathyroid gland                                    | uncharacterized tissue        |
| Human Placenta                                             | placenta                      |
| Human Platelet                                             | uncharacterized tissue        |
| Human Prostate gland                                       | prostate                      |
| Human Salivary gland                                       | salivary gland                |
| Human Skeletal muscle                                      | uncharacterized tissue        |
| Human Skin                                                 | skin                          |
| Human Small intestine                                      | gastrointestinal tract        |
| Human Spleen                                               | spleen                        |
| Human Synovial membrane                                    | synovium                      |
| Human Testis                                               | testis                        |
| Human Thymus gland                                         | uncharacterized tissue        |
| Human Thyroid gland                                        | thyroid                       |
| Human Uterus                                               | uterus                        |
| Human White blood cells                                    | whole blood                   |
| Infant Brain                                               | uncharacterized tissue        |
| Hippocampus                                                | uncharacterized tissue        |
| Human brain ARSanders                                      | uncharacterized tissue        |

| cDNA Library                               | Designated Tissue for Library |
|--------------------------------------------|-------------------------------|
| Human osteosarcoma EGracia                 | uncharacterized tissue        |
| Human glioblastoma UFischer                | uncharacterized tissue        |
| Human lung adenocarcinoma A549             | uncharacterized tissue        |
| Human cord blood mononuclear cell mRNA     | uncharacterized tissue        |
| Human (NSHeiss)                            | uncharacterized tissue        |
| RA-MO-III                                  | uncharacterized tissue        |
| Human (Fan,Wufang)                         | uncharacterized tissue        |
| Human adult (K.Okubo)                      | uncharacterized tissue        |
| Soares retina N2b5HR                       | retina                        |
| Human heart cDNA (YNakamura)               | heart                         |
| Human peripheral blood (Steve Elledge)     | uncharacterized tissue        |
| HPLA CCLee                                 | placenta                      |
| Human pancreatic cancer (CWallrapp)        | uncharacterized tissue        |
| Human fetal brain S.Meier-Ewert            | brain                         |
| Human alveolar rhabdomyosarcoma            | uncharacterized tissue        |
| Stratagene colon (#937204)                 | colon                         |
| Stratagene corneal stroma (#937222)        | eye                           |
| Human endothelial cell (Y.Mitsui)          | vascular                      |
| Stratagene pancreas (#937208)              | pancreas                      |
| Stratagene fibroblast (#937212)            | skin                          |
| Testis 5                                   | testis                        |
| Human brain cDNA                           | brain                         |
| Stratagene neuroepithelium (#937231)       | cerebrum                      |
| Clontech adult lung cDNA library (HL1158a) | uncharacterized tissue        |
| Human (P.Hui)                              | uncharacterized tissue        |
| Human exocervical cells (CGLee)            | uncharacterized tissue        |
| Human placenta cDNA (TFujiwara)            | placenta                      |
| Stratagene ovarian cancer (#937219)        | ovary                         |
| Human 23132 gastric carcinoma cell line    | stomach                       |
| Chromosome 7 Fetal Brain cDNA Library      | brain                         |
| Chromosome 7 Placental cDNA Library        | placenta                      |
| Chromosome 7 HeLa cDNA Library             | uncharacterized tissue        |
| Chromosome 7 Thymus cDNA Library           | thymus                        |
| Stratagene colon HT29 (#937221)            | colon                         |
| Stratagene endothelial cell 937223         | vascular                      |
| Stratagene neuroepithelium NT2RAMI 937234  | cerebrum                      |
| Stratagene hNT neuron (#937233)            | peripheral nervous system     |
| Stratagene HeLa cell s3 937216             | cervix                        |
| Stratagene muscle 937209                   | muscle                        |
| Human thymus (V.L.Boyartchuk)              | uncharacterized tissue        |

| cDNA Library                                       | Designated Tissue for Library |
|----------------------------------------------------|-------------------------------|
| Human fetal brain (G.G.Consalez)                   | uncharacterized tissue        |
| Stratagene NT2 neuronal precursor 937230           | peripheral nervous system     |
| Stratagene lung carcinoma 937218                   | lung                          |
| Stratagene fetal retina 937202                     | retina                        |
| Human newborn melanocytes (T.Vogt)                 | skin                          |
| Human neuroblastoma SK-ER3 cells (M.Garnier)       | uncharacterized tissue        |
| Human thymus 610t (M.D'Urso)                       | uncharacterized tissue        |
| Human keratinocyte differential display (B.Lin)    | uncharacterized tissue        |
| Human infant brain (J.-F.Cheng)                    | uncharacterized tissue        |
| Human Ulcerative Colitis Mucosa Express Library    | uncharacterized tissue        |
| Human GM-CSF-deprived TF-1 cell line (Liu,Hongtao) | uncharacterized tissue        |
| Soares placenta Nb2HP-B                            | uncharacterized tissue        |
| Human microdissection mediated cDNA capture clones | uncharacterized tissue        |
| Human cell line TF-1 (D.L.Ma)                      | uncharacterized tissue        |
| KG1-a Lambda Zap Express cDNA library              | uncharacterized tissue        |
| Human RT-PCR (S.Lefebvre)                          | uncharacterized tissue        |
| Human breast cancer cell line Bcap 37              | uncharacterized tissue        |
| Human HeLa cells (M.Lovett)                        | uncharacterized tissue        |
| Human fetal brain (M.Lovett)                       | uncharacterized tissue        |
| Human (M.Lovett)                                   | uncharacterized tissue        |
| Human fetal heart, Lambda ZAP Express              | heart                         |
| Stratagene schizo brain S11                        | cerebrum                      |
| Human retina (D.Swanson)                           | uncharacterized tissue        |
| Human LAK cell (Y.Abe)                             | uncharacterized tissue        |
| Human placental cDNA (Cheng Chi Lee)               | uncharacterized tissue        |
| Human YAC-derived (I.H.Still)                      | uncharacterized tissue        |
| Fetal brain                                        | uncharacterized tissue        |
| Heart III                                          | uncharacterized tissue        |
| Lung                                               | lung                          |
| Bone VII                                           | bone                          |
| Colon I                                            | colon                         |
| Liver I                                            | liver                         |
| Brain IX                                           | uncharacterized tissue        |
| Cornea I                                           | uncharacterized tissue        |
| Thymus I                                           | thymus                        |
| Cornea II                                          | uncharacterized tissue        |
| Trachea tumor                                      | uncharacterized tissue        |
| Fetal lung I                                       | lung                          |
| Fibrosarcoma                                       | uncharacterized tissue        |
| Lung tumor I                                       | uncharacterized tissue        |

| cDNA Library         | Designated Tissue for Library |
|----------------------|-------------------------------|
| Platelet             | uncharacterized tissue        |
| Skin tumor I         | skin                          |
| Thymus III           | thymus                        |
| Frontal lobe         | uncharacterized tissue        |
| Lung tumor II        | lung                          |
| Retina I             | uncharacterized tissue        |
| Skin tumor II        | uncharacterized tissue        |
| Supt cells           | uncharacterized tissue        |
| Fetal heart I        | uncharacterized tissue        |
| Fetal lung III       | lung                          |
| Fetal spleen         | spleen                        |
| Testis I             | testis                        |
| Uterus               | uterus                        |
| Fetal brain VI       | uncharacterized tissue        |
| Fetal heart II       | heart                         |
| Fetal liver IV       | liver                         |
| MCF7 cell line       | uncharacterized tissue        |
| Ovary II             | ovary                         |
| Fetal brain III      | brain                         |
| Fetal duramater      | uncharacterized tissue        |
| Fetal kidney I       | kidney                        |
| Fetal liver III      | liver                         |
| Infant brain         | brain                         |
| LNCAP cells I        | prostate                      |
| Retina II            | retina                        |
| Thymus tumor I       | thymus                        |
| Thyroid              | thyroid                       |
| Uterus tumor I       | uterus                        |
| CAMA1Ee cell line I  | uncharacterized tissue        |
| Fetal kidney II      | kidney                        |
| Leiomyloid tumor     | uncharacterized tissue        |
| Skeletal muscle      | uncharacterized tissue        |
| Thymus tumor II      | thymus                        |
| Uterus tumor II      | uncharacterized tissue        |
| CAMA1Ee cell line II | uncharacterized tissue        |
| Embryo, 7 week       | whole body                    |
| Embryo, 9 week       | whole body                    |
| Fetal bone           | bone                          |
| Lymph node I         | lymph node                    |
| Macrophage I         | uncharacterized tissue        |

| cDNA Library            | Designated Tissue for Library |
|-------------------------|-------------------------------|
| T-cell lymphoma         | uncharacterized tissue        |
| Testis tumor            | testis                        |
| Thymus tumor III        | uncharacterized tissue        |
| Epithelioid sarcoma     | skin                          |
| Jurkat T-cells I        | uncharacterized tissue        |
| Jurkat T-cells V        | uncharacterized tissue        |
| Liver III               | liver                         |
| Lymph node II           | uncharacterized tissue        |
| Macrophage II           | uncharacterized tissue        |
| Epididymus              | genitourinary                 |
| Esophagus tumor         | esophagus                     |
| Heart I                 | heart                         |
| Jurkat T-cells II       | uncharacterized tissue        |
| Jurkat T-cells VI       | uncharacterized tissue        |
| Namalwa B cells I       | uncharacterized tissue        |
| Pancreas tumor I        | pancreas                      |
| Embryo, 6 week II       | whole body                    |
| Greater omentum IV      | soft tissue                   |
| Jurkat T-cells III      | uncharacterized tissue        |
| Liver II                | uncharacterized tissue        |
| Namalwa B cells II      | uncharacterized tissue        |
| Ovarian cancer          | uncharacterized tissue        |
| Pancreas tumor II       | uncharacterized tissue        |
| Pineal gland I          | uncharacterized tissue        |
| Embryo, 12 week I       | whole body                    |
| Fetal muscle            | uncharacterized tissue        |
| Ovary I                 | ovary                         |
| Pancreas tumor III      | pancreas                      |
| Pineal gland II         | pineal gland                  |
| Spleen I                | spleen                        |
| Bone marrow             | bone marrow                   |
| Cerebellum I            | uncharacterized tissue        |
| Embryo, 12 week II      | whole body                    |
| Placenta II             | placenta                      |
| Placenta I              | placenta                      |
| Thymus II               | thymus                        |
| Cerebellum II           | cerebellum                    |
| Colon adenocarcinoma IV | colon                         |
| Greater omentum I       | uncharacterized tissue        |
| Greater omentum tumor   | uncharacterized tissue        |

| cDNA Library                   | Designated Tissue for Library |
|--------------------------------|-------------------------------|
| Kidney I                       | kidney                        |
| Salivary gland                 | salivary gland                |
| Fetal lung II                  | lung                          |
| Greater omentum II             | uncharacterized tissue        |
| Kidney IX                      | uncharacterized tissue        |
| Embryo, 6 week I               | whole body                    |
| Greater omentum III            | soft tissue                   |
| Pancreas I                     | pancreas                      |
| Pituitary gland                | pituitary gland               |
| Activated T-cells I            | uncharacterized tissue        |
| Activated T-cells V            | uncharacterized tissue        |
| Activated T-cells X            | uncharacterized tissue        |
| Brain IV                       | brain                         |
| Pancreas II                    | pancreas                      |
| Activated T-cells II           | uncharacterized tissue        |
| Activated T-cells IV           | uncharacterized tissue        |
| Activated T-cells IX           | uncharacterized tissue        |
| Activated T-cells VI           | uncharacterized tissue        |
| Activated T-cells XI           | uncharacterized tissue        |
| Activated T-cells XX           | uncharacterized tissue        |
| Adrenal gland tumor            | endocrine                     |
| Adrenal gland                  | uncharacterized tissue        |
| Esophagus                      | esophagus                     |
| Fetal brain I                  | brain                         |
| Fetal liver I                  | liver                         |
| Lymph node, subtracted         | uncharacterized tissue        |
| Paratid gland tumor            | uncharacterized tissue        |
| Small intestine I              | gastrointestinal tract        |
| Activated T-cells III          | uncharacterized tissue        |
| Activated T-cells VII          | uncharacterized tissue        |
| Activated T-cells XII          | uncharacterized tissue        |
| Fetal liver II                 | liver                         |
| Monocytes, stimulated II       | uncharacterized tissue        |
| Small intestine II             | gastrointestinal tract        |
| Activated T-cells VIII         | uncharacterized tissue        |
| Endometrial tumor              | uterus                        |
| Fetal brain II                 | uncharacterized tissue        |
| Red blood cell                 | bone marrow                   |
| Heart, subtracted (total cDNA) | uncharacterized tissue        |
| Fetal kidney III               | kidney                        |

| cDNA Library                              | Designated Tissue for Library |
|-------------------------------------------|-------------------------------|
| Ovary, subtracted                         | uncharacterized tissue        |
| Prostate gland I                          | prostate                      |
| Rhabdomyosarcoma                          | muscle                        |
| Spleen, subtracted                        | uncharacterized tissue        |
| Corpus callosum I                         | uncharacterized tissue        |
| Frontal cortex II                         | uncharacterized tissue        |
| Prostate gland V                          | uncharacterized tissue        |
| Right hemisphere                          | uncharacterized tissue        |
| Corpus callosum II                        | brain                         |
| Embryo, 8 week I                          | whole body                    |
| Fetal brain VII                           | uncharacterized tissue        |
| Fetal skin                                | skin                          |
| Gall bladder I                            | uncharacterized tissue        |
| Fetal heart, subtracted (total cDNA)      | uncharacterized tissue        |
| Gall bladder II                           | uncharacterized tissue        |
| Hippocampus I                             | cerebrum                      |
| Adipose tissue, brown                     | adipose                       |
| CCRF-CEM cells, cyclohexamide treated I   | uncharacterized tissue        |
| Fetal brain, subtracted                   | uncharacterized tissue        |
| HSC172 cells I                            | lung                          |
| Hippocampus II                            | cerebrum                      |
| Liver, subtracted (abundant clones) I     | liver                         |
| Parathyroid gland tumor I                 | parathyroid                   |
| Raji cells, cyclohexamide treated I       | uncharacterized tissue        |
| HSC172 cells II                           | lung                          |
| Liver, subtracted (abundant clones) II    | liver                         |
| Parathyroid gland tumor II                | uncharacterized tissue        |
| Thymus tumor, subtracted (total cDNA)     | thymus                        |
| Adipose tissue, white I                   | adipose                       |
| Aorta endothelial cells                   | vascular                      |
| Adipose tissue, white II                  | adipose                       |
| Liver, hepatocellular carcinoma           | liver                         |
| Macrophage, subtracted (total cDNA)       | uncharacterized tissue        |
| Synovial membrane                         | synovium                      |
| Left hemisphere                           | uncharacterized tissue        |
| Synovial sarcoma                          | uncharacterized tissue        |
| Infant adrenal gland I                    | endocrine                     |
| Embryo, 6 week, subtracted (total cDNA) I | whole body                    |
| Embryo, 7 week, subtracted (total cDNA) I | whole body                    |
| Infant adrenal gland II                   | endocrine                     |

| cDNA Library                                              | Designated Tissue for Library |
|-----------------------------------------------------------|-------------------------------|
| Placenta, subtracted (total cDNA)                         | placenta                      |
| Embryo, 6 week, subtracted (total cDNA) II                | whole body                    |
| Embryo, 7 week, subtracted (total cDNA) II                | whole body                    |
| Pancreas tumor, subtracted (abundant clones)              | pancreas                      |
| Aorta endothelial cells, TNF alpha-treated                | vascular                      |
| Right hemisphere, subtracted (mitochondria)               | uncharacterized tissue        |
| Umbilical vein endothelial cells I                        | vascular                      |
| Umbilical vein endothelial cells II                       | vascular                      |
| Pituitary gland, subtracted (prolactin/growth hormone) II | pituitary gland               |
| Infant adrenal gland, subtracted (total cDNA) I           | endocrine                     |
| Colon carcinoma (Caco-2) cell line I                      | colon                         |
| HCC cell line (matatasis to liver in mouse)               | colon                         |
| Colon carcinoma (Caco-2) cell line II                     | colon                         |
| Retinal pigment epithelium 0041 cell line                 | uncharacterized tissue        |
| Colon carcinoma (HCC) cell line                           | colon                         |
| HCC cell line (matatasis to liver in mouse) II            | colon                         |
| Colon carcinoma (HCC) cell line II                        | colon                         |
| Human Breast Cancer                                       | uncharacterized tissue        |
| Fetal heart, Lambda ZAP Express                           | heart                         |
| Adult heart, Lambda gt11                                  | heart                         |
| RA-MO-I                                                   | uncharacterized tissue        |
| HM3                                                       | muscle                        |
| Human fetal brain QBoqin3                                 | uncharacterized tissue        |
| PN001-Normal Human Prostate                               | prostate                      |
| Human fetal brain QBoqin4                                 | uncharacterized tissue        |
| Gessler Wilms tumor                                       | soft tissue                   |
| Human MCF7 cDNA subtracted with MDA-MB-231 cDNA           | uncharacterized tissue        |
| Human Bone Marrow Stromal Fibroblast                      | soft tissue                   |
| Human fetal liver (S.Xue)                                 | uncharacterized tissue        |
| Human RAP-PCR products                                    | uncharacterized tissue        |
| Human bone marrow stromal cells                           | bone marrow                   |
| Human erythroleukemia RAP-PCR products                    | uncharacterized tissue        |
| Human promyelocytic HL60 cell line (S.Herblot)            | uncharacterized tissue        |
| Human immortalized fibroblasts (H.L.Ozer)                 | uncharacterized tissue        |
| Human lung carcinoma (E.P.Diamandis)                      | uncharacterized tissue        |
| Human chromosome 14                                       | uncharacterized tissue        |
| Human fetal brain chromosome 21                           | uncharacterized tissue        |
| Human chromosome 6                                        | uncharacterized tissue        |
| GM10791 library (Eric D.Green)                            | uncharacterized tissue        |
| Total human library (David Schlessinger)                  | uncharacterized tissue        |

| cDNA Library                               | Designated Tissue for Library |
|--------------------------------------------|-------------------------------|
| 4AF1/106/KO15 library (Lap-Chee Tsui)      | uncharacterized tissue        |
| Human chromosome 11q23 mRNA (M.Katoh)      | uncharacterized tissue        |
| DKFZphamy1                                 | brain                         |
| DKFZphsnu1                                 | brain                         |
| DKFZphthml                                 | uncharacterized tissue        |
| Human embryo lung HEL cell (Pingkun Zhou)  | uncharacterized tissue        |
| Regional genomic DNA specific cDNA library | uncharacterized tissue        |
| subtracted 3' EST library                  | uncharacterized tissue        |
| Human Glioblastoma Cell                    | brain                         |
| Human Brain, Clontech                      | uncharacterized tissue        |
| Human brain frontal cortex                 | uncharacterized tissue        |
| Human HaCaT keratinocyte cDNA              | uncharacterized tissue        |
| Human Fetal Brain+Liver+Heart              | uncharacterized tissue        |
| Human Lung cDNA Library                    | uncharacterized tissue        |
| Barstead pancreas HPLRB1                   | pancreas                      |
| Barstead spleen HPLRB2                     | spleen                        |
| Human retina cell line ARPE-19             | uncharacterized tissue        |
| Normal Human Trabecular Bone Cells         | bone                          |
| Clontech catalog #CLHL1076b                | uncharacterized tissue        |
| Stratagene catalog #936206                 | uncharacterized tissue        |
| Human (J.Swensen)                          | uncharacterized tissue        |
| Human pancreatic islet cell                | uncharacterized tissue        |
| EST from 8p21.3-p22                        | uncharacterized tissue        |
| Human lung adenocarcinoma (M.Wu)           | uncharacterized tissue        |
| Human brain (K.Lueders)                    | uncharacterized tissue        |
| Clontech #HL1181a                          | uncharacterized tissue        |
| Clontech HI1149x                           | uncharacterized tissue        |
| Human HeLa (Y.Wang)                        | uncharacterized tissue        |
| Human chromosome 13q14 cDNA                | uncharacterized tissue        |
| Human fetal trachea fibroblast             | uncharacterized tissue        |
| Human brain cDNA (Life Technologies)       | uncharacterized tissue        |
| Human cell line PCI-O6A                    | uncharacterized tissue        |
| Human cell line PCI-O6B                    | uncharacterized tissue        |
| Human mRNA (Tripodis and Ragoussis)        | uncharacterized tissue        |
| Human fibrosarcoma cell line HT1080        | uncharacterized tissue        |
| Human fibrosarcoma cell line HT1080-6TGc5  | uncharacterized tissue        |
| Human cell line SK-N-MC                    | uncharacterized tissue        |
| Chromosome 5q33 transcripts                | uncharacterized tissue        |
| Human activated dendritic cell mRNA        | uncharacterized tissue        |
| Human cDNA (Chandrasekharappa,S.C.)        | uncharacterized tissue        |

| cDNA Library                                           | Designated Tissue for Library |
|--------------------------------------------------------|-------------------------------|
| Human kidney (Bi,A.)                                   | uncharacterized tissue        |
| Human testis (Bi,A.)                                   | uncharacterized tissue        |
| Human bone marrow (Bi,A.)                              | uncharacterized tissue        |
| Human skeletal muscle (Bi,A.)                          | uncharacterized tissue        |
| Human fetal brain (R.L.Margolis)                       | uncharacterized tissue        |
| Human cerebral cortex (R.L.Margolis)                   | uncharacterized tissue        |
| Human cell line AGZY-83a                               | uncharacterized tissue        |
| Human chromosome 5q31-q33 mRNA                         | uncharacterized tissue        |
| Human lymphocytes cDNA (R.Meneveri)                    | uncharacterized tissue        |
| Human small intestine cDNA (R.Meneveri)                | uncharacterized tissue        |
| Human ovary (H.Wang)                                   | uncharacterized tissue        |
| Human leukemia matchmaker, Clontech catalog #HL4015AB  | uncharacterized tissue        |
| Human lung cancer cell line A549.A549                  | uncharacterized tissue        |
| Human salivary gland cell line HSG                     | salivary gland                |
| Human Jurkat cell line mRNA (Thiele,K.)                | uncharacterized tissue        |
| Human testis (C.De Smet)                               | uncharacterized tissue        |
| Human mRNA (H.M.Robertson)                             | uncharacterized tissue        |
| Human mRNA (G.La Mantia)                               | uncharacterized tissue        |
| Human T-cell cDNA library (M.G.Smirnova)               | uncharacterized tissue        |
| Human hippocampus, Stratagene catalog #936205          | uncharacterized tissue        |
| Human cDNA from Wiskott-Aldrich syndrome gene region   | uncharacterized tissue        |
| Human chromosome 21q22 mRNA                            | uncharacterized tissue        |
| Human skin lesion from patient with systemic sclerosis | uncharacterized tissue        |
| Human TNF-treated BG9 fibroblasts                      | uncharacterized tissue        |
| Human primary melanocytes mRNA (I.M.Eisenbarth)        | skin                          |
| Human leukocyte (M.L.Markelov)                         | uncharacterized tissue        |
| Human female brain (Life Technologies)                 | uncharacterized tissue        |
| Human fetal brain cDNA (T.M.Gress)                     | uncharacterized tissue        |
| ICRFHFB                                                | uncharacterized tissue        |
| Human fetal brain (S.E.Mole)                           | uncharacterized tissue        |
| Human colorectal cancer (Genome Res.1995)              | uncharacterized tissue        |
| BL29 Burkitt's lymphoma (K.M.Timms)                    | uncharacterized tissue        |
| Human adult thymus NSTH II                             | uncharacterized tissue        |
| AP20 melanoma mRNA                                     | uncharacterized tissue        |
| Human lymphocyte mRNA (Zhu,L.-P.)                      | uncharacterized tissue        |
| human glioblastoma library                             | uncharacterized tissue        |
| Human neuroepithelium (N.Jiang)                        | uncharacterized tissue        |
| HL60 cDNA library                                      | uncharacterized tissue        |
| Human gastric cancer SGC-7901 cell line                | stomach                       |
| Johnston frontal cortex                                | cerebrum                      |

| cDNA Library                                        | Designated Tissue for Library |
|-----------------------------------------------------|-------------------------------|
| monocyte-derived dendritic cell library             | uncharacterized tissue        |
| Barstead aorta HPLRB3                               | vascular                      |
| Barstead prostate BPH HPLRB4                        | uncharacterized tissue        |
| Human fetal liver (J.Zhang)                         | uncharacterized tissue        |
| Human medullary thyroid carcinoma                   | uncharacterized tissue        |
| Human gastric carcinoma mRNA                        | stomach                       |
| Human adult aorta                                   | uncharacterized tissue        |
| Human fetal brain (Zakharev,V.M.and Belyavsky,A.V.) | uncharacterized tissue        |
| Human intestine from Crohn's disease patients       | uncharacterized tissue        |
| Human fetal liver cDNA library                      | liver                         |
| Yunnan Tin miner lung cancer tissue mRNA            | uncharacterized tissue        |
| HeLa cDNA (T.Noma)                                  | uncharacterized tissue        |
| Human brain mRNA (U.K.Rout)                         | uncharacterized tissue        |
| human embryo cDNA library                           | whole body                    |
| human kidney (N.Fuse)                               | uncharacterized tissue        |
| Human trapped exon (S.E.Antonarakis)                | uncharacterized tissue        |
| Schiller astrocytoma                                | brain                         |
| Schiller glioblastoma multiforme                    | uncharacterized tissue        |
| Schiller meningioma                                 | brain                         |
| Schiller oligodendroglioma                          | brain                         |
| Human oral keratinocytes                            | uncharacterized tissue        |
| Subtracted cDNA library of activated B lymphocyte   | uncharacterized tissue        |
| cDNA library of activated B cell line 3D5           | uncharacterized tissue        |
| Human placenta RT-PCR amplified cDNA                | uncharacterized tissue        |
| Human OCI LY8-C3P                                   | uncharacterized tissue        |
| Human C3-A11N                                       | uncharacterized tissue        |
| Human liver EST (Y.L.Yu)                            | uncharacterized tissue        |
| Human cell line A431 subclone                       | uncharacterized tissue        |
| Stanley Frontal NB pool 2                           | cerebrum                      |
| Stanley Frontal NS pool 2                           | cerebrum                      |
| Stanley Frontal SB pool 1                           | cerebrum                      |
| Stanley Frontal SN individual                       | cerebrum                      |
| Stanley Frontal SN pool 1                           | cerebrum                      |
| Stanley Frontal SN pool 2                           | cerebrum                      |
| Stanley Hippocampus NB pool 1                       | uncharacterized tissue        |
| Stanley Hippocampus SB pool 1                       | cerebrum                      |
| Stanley Hippocampus SN pool 1                       | cerebrum                      |
| Human E8CASS                                        | uncharacterized tissue        |
| Retinoid treated HeLa cells                         | uncharacterized tissue        |
| Barstead prostate BPH HPLRB4 1                      | prostate                      |

| cDNA Library                                            | Designated Tissue for Library |
|---------------------------------------------------------|-------------------------------|
| Human nasopharyngeal carcinoma cell line HNE1           | uncharacterized tissue        |
| Homo sapiens normalized K562                            | uncharacterized tissue        |
| Homo sapiens from hamster-human somatic cell-hybrid Q1Z | uncharacterized tissue        |
| Homo sapiens brain fetus                                | uncharacterized tissue        |
| Homo sapiens brain (M.Centola et al.)                   | uncharacterized tissue        |
| Homo sapiens laryngeal cancer                           | uncharacterized tissue        |
| PMA-induced HL60 cell subtraction library               | uncharacterized tissue        |
| Barstead aorta HPLRB6                                   | vascular                      |
| Barstead colon HPLRB7                                   | colon                         |
| Homo sapiens liver fetal                                | uncharacterized tissue        |
| Human heart cDNA (CCLee)                                | uncharacterized tissue        |
| Homo sapiens MCF7                                       | uncharacterized tissue        |
| Homo sapiens library (Carn G)                           | uncharacterized tissue        |
| Homo sapiens placenta                                   | uncharacterized tissue        |
| Homo sapiens library (Jene Q)                           | uncharacterized tissue        |
| Homo sapiens brain fetal (Jene Q)                       | uncharacterized tissue        |
| Homo sapiens KM3                                        | uncharacterized tissue        |
| Homo sapiens fetal brain 18 weeks                       | uncharacterized tissue        |
| Homo sapiens library (Sepe V)                           | uncharacterized tissue        |
| Homo sapiens library (Yamagata K)                       | uncharacterized tissue        |
| Homo sapiens mesothelium                                | uncharacterized tissue        |
| Homo sapiens HBE-M                                      | uncharacterized tissue        |
| NCI_CGAP_HN5                                            | head and neck                 |
| NCI_CGAP_HN6                                            | head and neck                 |
| Homo sapiens (Yang,T.)                                  | uncharacterized tissue        |
| Human tonsils DDRT-PCR                                  | uncharacterized tissue        |
| HeLa SRIG (Synthetic retinoids induced genes)           | uncharacterized tissue        |
| Homo sapiens monocyte-derived macrophages               | uncharacterized tissue        |
| NCI_CGAP_HSC3                                           | bone marrow                   |
| NCI_CGAP_HSC4                                           | bone marrow                   |
| NCI_CGAP_Brn21                                          | brain                         |
| Homo sapiens foreskin fibroblast                        | uncharacterized tissue        |
| Homo sapiens library (Seranski P)                       | uncharacterized tissue        |
| subtracted retina cDNA library                          | uncharacterized tissue        |
| subtracted RPE cDNA library                             | uncharacterized tissue        |
| NCI_CGAP_Ov35                                           | ovary                         |
| NCI_CGAP_Brn52                                          | brain                         |
| conorm                                                  | prostate                      |
| SAGE_OVCA432-2                                          | ovary                         |
| SAGE_OV1063-3                                           | ovary                         |

| cDNA Library                                   | Designated Tissue for Library |
|------------------------------------------------|-------------------------------|
| Human pancreatic cancer cell line PANC1        | uncharacterized tissue        |
| bvtumor                                        | prostate                      |
| tumor1                                         | prostate                      |
| DU-145                                         | uncharacterized tissue        |
| PC-3                                           | uncharacterized tissue        |
| LnCap                                          | uncharacterized tissue        |
| bvnorm                                         | prostate                      |
| ecnorm                                         | prostate                      |
| mynorm                                         | prostate                      |
| yodnorm                                        | prostate                      |
| tumor2                                         | prostate                      |
| misc                                           | prostate                      |
| ECR1                                           | uncharacterized tissue        |
| SAGE_Duke_mhh-1                                | brain                         |
| Subtracted syncytiotrophoblast cDNA library    | uncharacterized tissue        |
| Homo sapiens lung (Chang L-Y)                  | uncharacterized tissue        |
| Homo sapiens liver (Chang L-Y)                 | uncharacterized tissue        |
| Homo sapiens brain (Chang L-Y)                 | uncharacterized tissue        |
| Homo sapiens kidney (Chang L-Y)                | uncharacterized tissue        |
| Soares_Dieckgraefe_colon_NHCD                  | colon                         |
| Soares_Dieckgraefe_colon_NHUC                  | colon                         |
| Soares_thymus_NHFTh                            | thymus                        |
| Proliferating Erythroid Cells (LCB:ad library) | whole blood                   |
| Homo sapiens left brain fetus                  | uncharacterized tissue        |
| J.Jerspeth, et al., Strategies 5 (1), 1992     | uncharacterized tissue        |
| 564 (synonym: hfbr2)                           | brain                         |
| 547 (synonym: hfbr1)                           | brain                         |
| 566 (synonym: hfkd2)                           | kidney                        |
| 434 (synonym: htes3)                           | testis                        |
| 586 (synonym: hute1)                           | uterus                        |
| Homo sapiens library (Spurkland A)             | uncharacterized tissue        |
| Homo sapiens library (Yu Y)                    | uncharacterized tissue        |
| SAGE_Duke_H341                                 | brain                         |
| SAGE_HOSE_4                                    | ovary                         |
| Human fetal heart cDNA library                 | uncharacterized tissue        |
| Homo sapiens HL-60                             | uncharacterized tissue        |
| Homo sapiens library (Nguyen MH)               | uncharacterized tissue        |
| Homo sapiens testis (Ladomery MR)              | uncharacterized tissue        |
| Homo sapiens brain fetal (Zhang LD)            | uncharacterized tissue        |
| Homo sapiens oc3-VGH                           | uncharacterized tissue        |

| cDNA Library                                                   | Designated Tissue for Library |
|----------------------------------------------------------------|-------------------------------|
| Homo sapiens umbilical vein                                    | uncharacterized tissue        |
| SAGE_OVP-5                                                     | ovary                         |
| Homo sapiens nasopharynx carcinoma                             | uncharacterized tissue        |
| Homo sapiens nasopharynx                                       | uncharacterized tissue        |
| Homo sapiens liver                                             | uncharacterized tissue        |
| Homo sapiens ovary epithelium                                  | uncharacterized tissue        |
| Ovarian cancer cell lines SKOV3; 3AO                           | uncharacterized tissue        |
| pancreatic cancer cell line PANC1, down-regulated by TGF-beta1 | uncharacterized tissue        |
| pancreatic cancer cell line PANC1, up-regulated by TGF-beta1   | uncharacterized tissue        |
| Homo sapiens kidney fetal                                      | uncharacterized tissue        |
| Homo sapiens HNE-1                                             | uncharacterized tissue        |
| Homo sapiens non-small-cell lung carcinoma                     | uncharacterized tissue        |
| Homo sapiens BEAS-2B                                           | uncharacterized tissue        |
| NCI_CGAP_Ov18                                                  | ovary                         |
| Homo sapiens testis (Wang LF)                                  | uncharacterized tissue        |
| Human mRNA from cd34+ stem cells                               | whole blood                   |
| SAGE_LNCaP                                                     | prostate                      |
| SAGE_OVT-6                                                     | ovary                         |
| SAGE_H1126                                                     | brain                         |
| polydA/dT(-) colon cDNA library                                | uncharacterized tissue        |
| NCI_CGAP_CML1                                                  | whole blood                   |
| NCI_CGAP_Co17                                                  | colon                         |
| NCI_CGAP_Pit1                                                  | pituitary gland               |
| NCI_CGAP_Sar4                                                  | soft tissue                   |
| NCI_CGAP_Brn53                                                 | brain                         |
| NCI_CGAP_Br18                                                  | mammary gland                 |
| NCI_CGAP_Lu27                                                  | lung                          |
| NCI_CGAP_Lu28                                                  | lung                          |
| NCI_CGAP_GU1                                                   | genitourinary                 |
| NCI_CGAP_Kid13                                                 | kidney                        |
| NCI_CGAP_Mel15                                                 | skin                          |
| NCI_CGAP_Ov38                                                  | ovary                         |
| NCI_CGAP_Co18                                                  | colon                         |
| NCI_CGAP_Co19                                                  | colon                         |
| NCI_CGAP_Co20                                                  | colon                         |
| NCI_CGAP_Co21                                                  | colon                         |
| NCI_CGAP_Lu31                                                  | lung                          |
| CT0014                                                         | colon                         |
| HT0012                                                         | head and neck                 |
| HT0023                                                         | head and neck                 |

| cDNA Library                          | Designated Tissue for Library |
|---------------------------------------|-------------------------------|
| ST0007                                | stomach                       |
| Human fetal brain Express Library     | uncharacterized tissue        |
| Homo sapiens nasopharyngeal carcinoma | uncharacterized tissue        |
| NCI_CGAP_Pr1                          | prostate                      |
| NCI_CGAP_Pr2                          | prostate                      |
| NCI_CGAP_Pr3                          | prostate                      |
| NCI_CGAP_Pr4                          | prostate                      |
| NCI_CGAP_Ov1                          | ovary                         |
| NCI_CGAP_AR1                          | muscle                        |
| NCI_CGAP_Co1                          | colon                         |
| NCI_CGAP_GC1                          | germ cell                     |
| NCI_CGAP_GC2                          | germ cell                     |
| NCI_CGAP_Co2                          | colon                         |
| NCI_CGAP_Lu1                          | lung                          |
| NCI_CGAP_Sch1                         | peripheral nervous system     |
| NCI_CGAP_AA1                          | adrenal cortex                |
| NCI_CGAP_Co3                          | colon                         |
| NCI_CGAP_Pr5                          | prostate                      |
| NCI_CGAP_Pr6                          | prostate                      |
| NCI_CGAP_Pr7                          | prostate                      |
| NCI_CGAP_Pr8                          | prostate                      |
| NCI_CGAP_Pr9                          | prostate                      |
| NCI_CGAP_Pr10                         | prostate                      |
| NCI_CGAP_Pr11                         | prostate                      |
| NCI_CGAP_Pr12                         | prostate                      |
| NCI_CGAP_Li1                          | uncharacterized tissue        |
| NCI_CGAP_Li2                          | uncharacterized tissue        |
| NCI_CGAP_Lip2                         | adipose                       |
| NCI_CGAP_Kid1                         | kidney                        |
| NCI_CGAP_Thy1                         | thyroid                       |
| NCI_CGAP_Ov2                          | ovary                         |
| NCI_CGAP_Al1                          | muscle                        |
| NCI_CGAP_Ew1                          | uncharacterized tissue        |
| NCI_CGAP_Co4                          | colon                         |
| NCI_CGAP_Pr21                         | prostate                      |
| NCI_CGAP_Pr22                         | prostate                      |
| NCI_CGAP_Br1.1                        | mammary gland                 |
| NCI_CGAP_Br2                          | mammary gland                 |
| NCI_CGAP_Pr20                         | uncharacterized tissue        |
| NCI_CGAP_Pr18                         | uncharacterized tissue        |

| cDNA Library   | Designated Tissue for Library |
|----------------|-------------------------------|
| NCI_CGAP_Pr16  | uncharacterized tissue        |
| NCI_CGAP_GC3   | germ cell                     |
| NCI_CGAP_GC4   | germ cell                     |
| NCI_CGAP_Lei2  | muscle                        |
| NCI_CGAP_Kid3  | kidney                        |
| NCI_CGAP_Kid5  | kidney                        |
| NCI_CGAP_Co9   | colon                         |
| NCI_CGAP_Co10  | colon                         |
| NCI_CGAP_Lu5   | lung                          |
| NCI_CGAP_Co8   | colon                         |
| NCI_CGAP_GCB1  | lymph node                    |
| NCI_CGAP_Br3   | mammary gland                 |
| NCI_CGAP_Gas1  | stomach                       |
| NCI_CGAP_Co11  | colon                         |
| NCI_CGAP_GC5   | germ cell                     |
| NCI_CGAP_Pr23  | prostate                      |
| NCI_CGAP_SS1   | soft tissue                   |
| NCI_CGAP_Phe1  | adrenal medulla               |
| NCI_CGAP_Lar1  | head and neck                 |
| NCI_CGAP_Pr4.1 | prostate                      |
| NCI_CGAP_Co12  | colon                         |
| NCI_CGAP_Kid6  | kidney                        |
| NCI_CGAP_HSC1  | bone marrow                   |
| NCI_CGAP_Lym3  | lymph node                    |
| NCI_CGAP_Br4   | uncharacterized tissue        |
| NCI_CGAP_Br5   | uncharacterized tissue        |
| NCI_CGAP_Ov5   | uncharacterized tissue        |
| NCI_CGAP_Ov6   | uncharacterized tissue        |
| NCI_CGAP_Pr24  | prostate                      |
| NCI_CGAP_Pr25  | prostate                      |
| NCI_CGAP_Kid7  | kidney                        |
| NCI_CGAP_Thym1 | thymus                        |
| NCI_CGAP_CLL1  | whole blood                   |
| NCI_CGAP_GCB0  | lymph node                    |
| NCI_CGAP_CNS1  | brain                         |
| NCI_CGAP_Ov8   | ovary                         |
| NCI_CGAP_Br7   | mammary gland                 |
| NCI_CGAP_Li5   | liver                         |
| NCI_CGAP_PNS1  | peripheral nervous system     |
| NCI_CGAP_Lu6   | lung                          |

| cDNA Library                         | Designated Tissue for Library |
|--------------------------------------|-------------------------------|
| NCI_CGAP_HN1                         | head and neck                 |
| NCI_CGAP_HN2                         | head and neck                 |
| NCI_CGAP_Mel3                        | skin                          |
| NCI_CGAP_HN3                         | head and neck                 |
| NCI_CGAP_HN4                         | head and neck                 |
| NCI_CGAP_Lym5                        | lymph node                    |
| NCI_CGAP_Lym6                        | lymph node                    |
| NCI_CGAP_Eso2                        | esophagus                     |
| NCI_CGAP_Brn20                       | brain                         |
| Soares_testis_NHT                    | testis                        |
| Soares_pineal_gland_N3HPG            | pineal gland                  |
| Soares_parathyroid_tumor_NbHPA       | parathyroid                   |
| Soares_NFL_T_GBC_S1                  | pooled tissue                 |
| Soares_multiple_sclerosis_2NbHMSP    | brain                         |
| Soares_fetal_liver_spleen_1NFLS_S1   | pooled tissue                 |
| Soares_total_fetus_Nb2HF8_9w         | whole body                    |
| Soares_NbHFB                         | brain                         |
| Soares_NhHMPu_S1                     | pooled tissue                 |
| NCI_CGAP_Brn23                       | brain                         |
| NCI_CGAP_Brn25                       | brain                         |
| Soares_senescent_fibroblasts_NbHSF   | skin                          |
| Soares_fetal_heart_NbHH19W           | heart                         |
| Soares_pregnant_uterus_NbHPU         | uterus                        |
| Soares_placenta_8to9weeks_2NbHP8to9W | placenta                      |
| Soares_fetal_lung_NbHL19W            | lung                          |
| SAGE_HCT116                          | colon                         |
| SAGE_Caco_2                          | colon                         |
| NCI_CGAP_Lu19                        | lung                          |
| NCI_CGAP_Kid8                        | kidney                        |
| NCI_CGAP_Co14                        | colon                         |
| NCI_CGAP_Ov23                        | ovary                         |
| NCI_CGAP_Ut1                         | uterus                        |
| NCI_CGAP_Ut2                         | uterus                        |
| NCI_CGAP_Ut3                         | uterus                        |
| NCI_CGAP_Ut4                         | uterus                        |
| NCI_CGAP_Brn35                       | brain                         |
| NCI_CGAP_Lym12                       | lymph node                    |
| NCI_CGAP_Pan1                        | pancreas                      |
| NCI_CGAP_Gas4                        | stomach                       |
| NCI_CGAP_Ov26                        | ovary                         |

| cDNA Library                                     | Designated Tissue for Library |
|--------------------------------------------------|-------------------------------|
| SAGE_Duke_H392                                   | brain                         |
| SAGE_Duke_GBM_H1110                              | brain                         |
| SAGE_SW837                                       | colon                         |
| SAGE_RKO                                         | colon                         |
| NCI_CGAP_Pr28                                    | prostate                      |
| NCI_CGAP_GC6                                     | germ cell                     |
| SAGE_pooled_GBM                                  | brain                         |
| SAGE_BB542_whitematter                           | brain                         |
| NCI_CGAP_Br12                                    | mammary gland                 |
| NCI_CGAP_Ov31                                    | ovary                         |
| NCI_CGAP_Ov32                                    | ovary                         |
| NCI_CGAP_Ov33                                    | ovary                         |
| NCI_CGAP_Ov34                                    | ovary                         |
| SAGE_NHA(5th)                                    | brain                         |
| SAGE_normal_pool(6th)                            | brain                         |
| NCI_CGAP_Kid11                                   | kidney                        |
| NCI_CGAP_Kid12                                   | kidney                        |
| NCI_CGAP_Co16                                    | colon                         |
| NCI_CGAP_Lu24                                    | lung                          |
| SAGE_NC1                                         | colon                         |
| SAGE_NC2                                         | colon                         |
| NCI_CGAP_Ov36                                    | ovary                         |
| NCI_CGAP_Br13                                    | mammary gland                 |
| NCI_CGAP_Br14                                    | mammary gland                 |
| SAGE_Tu102                                       | colon                         |
| SAGE_Tu98                                        | colon                         |
| NCI_CGAP_Br15                                    | mammary gland                 |
| NCI_CGAP_Br16                                    | mammary gland                 |
| NCI_CGAP_Br17                                    | mammary gland                 |
| NCI_CGAP_HSC2                                    | bone marrow                   |
| NCI_CGAP_Ov37                                    | ovary                         |
| NCI_CGAP_Lu25                                    | lung                          |
| NCI_CGAP_Lu26                                    | lung                          |
| Soares_NSF_F8_9W_OT_PA_P_S1                      | pooled tissue                 |
| SAGE_ES2-1                                       | ovary                         |
| Fetal Brain, Bento Soares                        | brain                         |
| Hippocampus, Ruben Moreno                        | brain                         |
| Temporal Cortex, Stratagene (cat.#935205)        | cerebrum                      |
| Whole Brain, Clontech mRNA, Ruben Moreno         | brain                         |
| Subtracted Hippocampus, Stratagene (cat.#936205) | brain                         |

| cDNA Library                                         | Designated Tissue for Library |
|------------------------------------------------------|-------------------------------|
| Subtracted human retinal pigment epithelium (RPE)    | retina                        |
| Stratagene cDNA library Human heart, cat#936208      | heart                         |
| Liver HepG2 cell line.                               | liver                         |
| B, Human Liver tissue                                | liver                         |
| H, Human adult Brain Cortex tissue                   | cerebrum                      |
| JG, Human foetal Kidney tissue                       | uncharacterized tissue        |
| O, Human adult Bone tissue                           | uncharacterized tissue        |
| P, Human foetal Brain Whole tissue                   | brain                         |
| S, Human foetal Adrenals tissue                      | endocrine                     |
| T, Human adult Rhabdomyosarcoma cell-line            | muscle                        |
| TEST1, Human adult Testis tissue                     | testis                        |
| V, Human Placenta tissue                             | placenta                      |
| W, Human Liver tissue                                | uncharacterized tissue        |
| X, Human Liver tissue                                | uncharacterized tissue        |
| Y, Human Placenta tissue                             | placenta                      |
| Stratagene cDNA library Human fibroblast, cat#937212 | uncharacterized tissue        |
| Human Infant Brain, Bento Soares                     | uncharacterized tissue        |
| GeneTrack, 4p16.3 JM Rommens                         | pooled tissue                 |
| Stratagene cat#937212 (1992)                         | uncharacterized tissue        |
| Fetal brain, Stratagene (cat#936206)                 | brain                         |
| Hippocampus, prescreened, Stratagene (cat#936205)    | uncharacterized tissue        |
| Hippocampus, random, Stratagene (cat#936205)         | uncharacterized tissue        |
| Hippocampus, subtracted, Stratagene (cat#936205)     | uncharacterized tissue        |
| Stratagene human foetal retina                       | uncharacterized tissue        |
| b4HB3MA Cot8-HAP-Ft                                  | brain                         |
| Chromosome 9 exon                                    | uncharacterized tissue        |
| Human pancreatic islet                               | pancreatic islet              |
| Heart                                                | heart                         |
| Atrium cDNA library Human heart                      | heart                         |
| Hippocampus, Stratagene (cat.#936205)                | cerebrum                      |
| Chromosome 9 exon II                                 | uncharacterized tissue        |
| HL 1011                                              | uncharacterized tissue        |
| Human K562 erythroleukemic cells                     | uncharacterized tissue        |
| Fetal brain, Stratagene                              | brain                         |
| Normalized infant brain, Bento Soares                | brain                         |
| Infant Brain, Bento Soares                           | brain                         |
| Infant brain, Bento Soares                           | brain                         |
| Human whole brain                                    | uncharacterized tissue        |
| Human CGM                                            | uncharacterized tissue        |
| Human promyelocyte                                   | bone marrow                   |

| cDNA Library              | Designated Tissue for Library |
|---------------------------|-------------------------------|
| Human aortic endothelium  | vascular                      |
| Human colon mucosa        | colon                         |
| 1HB3MK                    | uncharacterized tissue        |
| 2HB3MA                    | uncharacterized tissue        |
| 2HB3MK                    | uncharacterized tissue        |
| 2HFBAK19-Cot-inf-FTA      | uncharacterized tissue        |
| 4HFLSK20                  | uncharacterized tissue        |
| b4HB3MA-Cot0.38-HAP-B     | uncharacterized tissue        |
| b4HB3MA-Cot109+10-Bio     | uncharacterized tissue        |
| b4HB3MA-Cot109+103+85-Bio | uncharacterized tissue        |
| b4HB3MA-Cot109+103-Bio    | uncharacterized tissue        |
| b4HB3MA-Cot12-HAP-B       | uncharacterized tissue        |
| b4HB3MA-Cot12-HAP-Ft      | uncharacterized tissue        |
| b4HB3MA-Cot14.5           | uncharacterized tissue        |
| b4HB3MA-Cot18-Bio         | uncharacterized tissue        |
| b4HB3MA-Cot51.5-HAP-Ft    | uncharacterized tissue        |
| b4HB3MK                   | uncharacterized tissue        |
| b4HFLSK20                 | uncharacterized tissue        |
| Cot250Ft-b4HB3MA          | uncharacterized tissue        |
| HMSWYK                    | uncharacterized tissue        |
| HWM42YA                   | uncharacterized tissue        |
| N-b4HB3MA-Cot109          | uncharacterized tissue        |
| N2HFBA19                  | uncharacterized tissue        |
| NHB3MK                    | uncharacterized tissue        |
| 3HFLSK20                  | pooled tissue                 |
| 4HB3MK                    | uncharacterized tissue        |
| 4HFLSA20                  | uncharacterized tissue        |
| b4HB3MA Cot109+10-Bio     | uncharacterized tissue        |
| b4HB3MA Cot109+103+85-Bio | uncharacterized tissue        |
| b4HB3MA Cot109+103-Bio    | uncharacterized tissue        |
| b4HB3MA Cot14.5           | uncharacterized tissue        |
| b4HB3MA Cot18-Bio         | uncharacterized tissue        |
| Cot1374Ft 4HB3MA          | uncharacterized tissue        |
| Cot250Ft b4HB3MA          | uncharacterized tissue        |
| Cot274 N4HB3MA            | uncharacterized tissue        |
| HB3MK                     | uncharacterized tissue        |
| N-b4HB3MA Cot109          | uncharacterized tissue        |
| N3HFLSK20                 | pooled tissue                 |
| N4HB3MK                   | uncharacterized tissue        |
| b4HB3MA                   | uncharacterized tissue        |

| cDNA Library                                             | Designated Tissue for Library |
|----------------------------------------------------------|-------------------------------|
| b4HB3MA-Cot109-Bio                                       | uncharacterized tissue        |
| HB3MA                                                    | uncharacterized tissue        |
| b4HB3MA-FT20N-b4HB3MA                                    | uncharacterized tissue        |
| b4HB3MA-Cot0.38-HAP-Ft-6                                 | uncharacterized tissue        |
| Human brain striatum                                     | brain                         |
| Human colorectal cancer                                  | colon                         |
| 4HB3MA-Bio                                               | uncharacterized tissue        |
| ClonTech HL 1065a                                        | brain                         |
| Human epidermal keratinocyte                             | skin                          |
| Human placenta                                           | placenta                      |
| NEM subtracted human fetal kidney cDNA                   | kidney                        |
| HTCDL1                                                   | thymus                        |
| Human islet                                              | uncharacterized tissue        |
| Testis 1                                                 | testis                        |
| Testis 2                                                 | testis                        |
| BL29 Burkitt's lymphoma, Pascalis Sideras                | uncharacterized tissue        |
| CD34+DIRECTIONAL                                         | uncharacterized tissue        |
| Clontech adult human fat cell library HL1108A            | uncharacterized tissue        |
| Human Genomic                                            | uncharacterized tissue        |
| SAGE_Duke_H247_normal                                    | brain                         |
| SAGE_Duke_H247_Hypoxia                                   | brain                         |
| SAGE_Duke-H988                                           | brain                         |
| NCI_CGAP_Sub3                                            | uncharacterized tissue        |
| radiation induced genes library                          | uncharacterized tissue        |
| Homo sapiens endometrium adult                           | uncharacterized tissue        |
| Human umbilical venous cord                              | uncharacterized tissue        |
| Homo sapiens u937                                        | uncharacterized tissue        |
| Homo sapiens differential display product                | uncharacterized tissue        |
| SAGE_Duke_post_crisis_fibroblasts                        | gastrointestinal tract        |
| Myosin light chain                                       | uncharacterized tissue        |
| cDNA converted from mRNA of normal human small intestine | uncharacterized tissue        |
| cDNA converted from thymus mRNA                          | uncharacterized tissue        |
| cDNA converted from placenta mRNA                        | uncharacterized tissue        |
| cDNA converted from testis mRNA                          | uncharacterized tissue        |
| cDNA converted from bone marrow mRNA                     | uncharacterized tissue        |
| cDNA converted from trachea mRNA                         | uncharacterized tissue        |
| cDNA converted from colon mRNA                           | uncharacterized tissue        |
| NIH_MGC_2                                                | uncharacterized tissue        |
| NIH_MGC_3                                                | lymph node                    |

| cDNA Library | Designated Tissue for Library |
|--------------|-------------------------------|
| NIH_MGC_4    | cervix                        |
| NIH_MGC_35   | cervix                        |
| NIH_MGC_7    | lung                          |
| NIH_MGC_5    | cervix                        |
| NIH_MGC_8    | lymph node                    |
| NIH_MGC_14   | kidney                        |
| NIH_MGC_15   | colon                         |
| NIH_MGC_20   | skin                          |
| NIH_MGC_21   | placenta                      |
| NIH_MGC_10   | placenta                      |
| NIH_MGC_12   | cervix                        |
| BT0041       | mammary gland                 |
| BT0043       | mammary gland                 |
| BT0046       | mammary gland                 |
| BT0057       | mammary gland                 |
| BT0068       | mammary gland                 |
| BT0074       | mammary gland                 |
| BT0077       | mammary gland                 |
| BT0078       | mammary gland                 |
| BT0091       | mammary gland                 |
| BT0152       | mammary gland                 |
| BT0214       | mammary gland                 |
| BT0217       | mammary gland                 |
| BT0228       | mammary gland                 |
| BT0233       | mammary gland                 |
| BT0246       | mammary gland                 |
| BT0247       | mammary gland                 |
| CT0027       | colon                         |
| CT0063       | colon                         |
| CT0066       | colon                         |
| CT0068       | colon                         |
| CT0084       | colon                         |
| CT0094       | colon                         |
| CT0102       | colon                         |
| CT0106       | colon                         |
| CT0113       | colon                         |
| CT0127       | colon                         |
| CT0128       | colon                         |
| CT0129       | colon                         |
| CT0131       | colon                         |

| cDNA Library | Designated Tissue for Library |
|--------------|-------------------------------|
| CT0145       | colon                         |
| CT0149       | colon                         |
| CT0151       | colon                         |
| CT0153       | colon                         |
| CT0155       | colon                         |
| CT0159       | colon                         |
| CT0161       | colon                         |
| CT0172       | colon                         |
| CT0197       | colon                         |
| CT0199       | colon                         |
| HT0018       | head and neck                 |
| HT0030       | head and neck                 |
| HT0031       | head and neck                 |
| HT0032       | head and neck                 |
| HT0034       | head and neck                 |
| HT0038       | head and neck                 |
| HT0059       | head and neck                 |
| HT0060       | head and neck                 |
| HT0061       | head and neck                 |
| HT0062       | head and neck                 |
| HT0065       | head and neck                 |
| HT0066       | head and neck                 |
| HT0067       | head and neck                 |
| HT0070       | head and neck                 |
| HT0074       | head and neck                 |
| HT0091       | head and neck                 |
| HT0105       | head and neck                 |
| HT0106       | head and neck                 |
| HT0111       | head and neck                 |
| HT0112       | head and neck                 |
| HT0113       | head and neck                 |
| HT0114       | head and neck                 |
| HT0115       | head and neck                 |
| HT0116       | head and neck                 |
| HT0118       | head and neck                 |
| HT0123       | head and neck                 |
| HT0125       | head and neck                 |
| HT0134       | head and neck                 |
| ST0008       | stomach                       |
| ST0011       | stomach                       |

| cDNA Library                          | Designated Tissue for Library |
|---------------------------------------|-------------------------------|
| ST0012                                | stomach                       |
| ST0013                                | stomach                       |
| ST0019                                | stomach                       |
| ST0032                                | stomach                       |
| ST0033                                | stomach                       |
| ST0036                                | stomach                       |
| ST0065                                | stomach                       |
| ST0066                                | stomach                       |
| ST0067                                | stomach                       |
| ST0069                                | stomach                       |
| ST0070                                | stomach                       |
| ST0071                                | stomach                       |
| ST0072                                | stomach                       |
| ST0074                                | stomach                       |
| ST0092                                | stomach                       |
| ST0093                                | stomach                       |
| ST0094                                | stomach                       |
| ST0115                                | stomach                       |
| ST0120                                | stomach                       |
| NCI_CGAP_Thy4                         | thyroid                       |
| NCI_CGAP_RDF1                         | uncharacterized tissue        |
| NCI_CGAP_RDF2                         | prostate                      |
| SAGE_Duke_precrisis_fibroblasts       | gastrointestinal tract        |
| NIH_MGC_36                            | lymph node                    |
| NIH_MGC_37                            | lymph node                    |
| NIH_MGC_38                            | lymph node                    |
| human islet cDNA differential display | uncharacterized tissue        |
| NCI_CGAP_Thy5                         | uncharacterized tissue        |
| NCI_CGAP_Thy6                         | thyroid                       |
| NCI_CGAP_Thy7                         | thyroid                       |
| NCI_CGAP_Thy8                         | thyroid                       |
| NCI_CGAP_Thy10                        | thyroid                       |
| NCI_CGAP_Sub4                         | uncharacterized tissue        |
| SAGE_DCIS_2                           | mammary gland                 |
| SAGE_Br_N                             | mammary gland                 |
| SAGE_A+                               | prostate                      |
| Uni-ZAP XR retinal pigment epithelium | uncharacterized tissue        |
| SAGE_IOSE29-11                        | ovary                         |
| Breast Cancer Associated Library      | uncharacterized tissue        |
| NIH_MGC_17                            | muscle                        |

| cDNA Library                                         | Designated Tissue for Library |
|------------------------------------------------------|-------------------------------|
| cDNA Library from Human Neuroblastoma SK-N-SH        | uncharacterized tissue        |
| cDNA Library from Human Neuroepithelioma SK-N-MC     | uncharacterized tissue        |
| NCI_CGAP_Sub5                                        | uncharacterized tissue        |
| NCI_CGAP_Sub6                                        | uncharacterized tissue        |
| SAGE_Duke_H1043                                      | brain                         |
| gastric epithelial cell GES-1                        | uncharacterized tissue        |
| NCI_CGAP_Co23                                        | colon                         |
| NCI_CGAP_HN14                                        | uncharacterized tissue        |
| NCI_CGAP_HN15                                        | uncharacterized tissue        |
| NCI_CGAP_HN16                                        | head and neck                 |
| cDNA Library from rIL-2 activated lymphocytes        | uncharacterized tissue        |
| NCI_CGAP_Brn41                                       | brain                         |
| Homo sapiens LNCaP prostate cancer                   | uncharacterized tissue        |
| LoVo express library before ATRA and D3 induced      | uncharacterized tissue        |
| LoVo express library after ATRA and D3 induced       | uncharacterized tissue        |
| gastric carcinoma cell GC7901                        | uncharacterized tissue        |
| NIH_MGC_9                                            | ovary                         |
| NCI_CGAP_Thy3                                        | thyroid                       |
| NCI_CGAP_Ov41                                        | ovary                         |
| NCI_CGAP_Pan3                                        | pancreas                      |
| NCI_CGAP_HN13                                        | head and neck                 |
| NCI_CGAP_Adr1                                        | endocrine                     |
| NCI_CGAP_Ut7                                         | uterus                        |
| NCI_CGAP_Sub7                                        | uncharacterized tissue        |
| SAGE_Duke_1273                                       | cerebellum                    |
| Homo sapiens endothelial cell                        | uncharacterized tissue        |
| human melanoma microcell hybrid line, MeJJuSo-28(1n) | uncharacterized tissue        |
| human melanoma line, MeJJuSo                         | uncharacterized tissue        |
| FIBHSMI                                              | uncharacterized tissue        |
| FIBCTGF                                              | uncharacterized tissue        |
| FIBHAV                                               | uncharacterized tissue        |
| SAGE_TSU                                             | prostate                      |
| NIH_MGC_16                                           | eye                           |
| NIH_MGC_19                                           | brain                         |
| Homo sapiens inflammatory skin                       | uncharacterized tissue        |
| Homo sapiens psoriatic skin                          | uncharacterized tissue        |
| LTI_NFL011_NBC1                                      | brain                         |
| LTI_NFL004_NBC2                                      | brain                         |
| LTI_NFL003_NBC3                                      | brain                         |
| LTI_NFL001_NBC4                                      | brain                         |

| cDNA Library                                                             | Designated Tissue for Library |
|--------------------------------------------------------------------------|-------------------------------|
| LTI_FL011_BC1                                                            | brain                         |
| LTI_FL012_TC1                                                            | uncharacterized tissue        |
| LTI_FL002_PL1                                                            | placenta                      |
| LTI_FL013_FBrn1                                                          | brain                         |
| NCI_CGAP_Thy11                                                           | thyroid                       |
| NCI_CGAP_Thy12                                                           | thyroid                       |
| NIH_MGC_50                                                               | lymph node                    |
| NIH_MGC_51                                                               | lymph node                    |
| NIH_MGC_52                                                               | lymph node                    |
| SAGE_A-                                                                  | prostate                      |
| Human fetal heart cDNA library (Liu,L.and Gu,J.)                         | uncharacterized tissue        |
| Immunomagnetically sorted breast epithelial cells (differential display) | uncharacterized tissue        |
| SAGE_Duke_thalamus                                                       | brain                         |
| Homo sapiens prostate adult                                              | uncharacterized tissue        |
| Human differential display products                                      | uncharacterized tissue        |
| SAGE_Duke_H1020                                                          | brain                         |
| Homo sapiens PC-3M high metastasis subline 1E8                           | uncharacterized tissue        |
| Homo sapiens PC-3M low metastasis subline 2B4                            | uncharacterized tissue        |
| CT0114                                                                   | colon                         |
| CT0117                                                                   | colon                         |
| CT0135                                                                   | colon                         |
| CT0141                                                                   | colon                         |
| CT0143                                                                   | colon                         |
| CT0160                                                                   | colon                         |
| CT0163                                                                   | colon                         |
| CT0165                                                                   | colon                         |
| CT0167                                                                   | colon                         |
| CT0176                                                                   | colon                         |
| CT0177                                                                   | colon                         |
| CT0196                                                                   | colon                         |
| CT0198                                                                   | colon                         |
| CT0200                                                                   | colon                         |
| CT0201                                                                   | colon                         |
| CT0202                                                                   | colon                         |
| CT0203                                                                   | colon                         |
| HT0082                                                                   | head and neck                 |
| HT0107                                                                   | head and neck                 |
| HT0117                                                                   | head and neck                 |
| HT0124                                                                   | head and neck                 |
| HT0128                                                                   | head and neck                 |

| cDNA Library                      | Designated Tissue for Library |
|-----------------------------------|-------------------------------|
| HT0130                            | head and neck                 |
| HT0136                            | head and neck                 |
| HT0137                            | head and neck                 |
| HT0138                            | head and neck                 |
| HT0139                            | head and neck                 |
| HT0140                            | head and neck                 |
| HT0141                            | head and neck                 |
| ST0078                            | stomach                       |
| ST0080                            | stomach                       |
| ST0081                            | stomach                       |
| ST0114                            | stomach                       |
| SAGE_Duke_BB542_normal_cerebellum | cerebellum                    |
| BN0001                            | mammary gland                 |
| BN0002                            | mammary gland                 |
| BN0003                            | mammary gland                 |
| BN0004                            | mammary gland                 |
| BN0005                            | mammary gland                 |
| BN0012                            | mammary gland                 |
| BN0013                            | mammary gland                 |
| BN0014                            | mammary gland                 |
| BN0015                            | mammary gland                 |
| BT0019                            | mammary gland                 |
| BT0040                            | mammary gland                 |
| BT0155                            | mammary gland                 |
| BT0248                            | mammary gland                 |
| BT0249                            | mammary gland                 |
| BT0252                            | mammary gland                 |
| BT0253                            | mammary gland                 |
| BT0254                            | mammary gland                 |
| BT0255                            | mammary gland                 |
| BT0256                            | mammary gland                 |
| BT0257                            | mammary gland                 |
| BT0258                            | mammary gland                 |
| BT0259                            | mammary gland                 |
| BT0260                            | mammary gland                 |
| BT0263                            | mammary gland                 |
| BT0264                            | mammary gland                 |
| BT0265                            | mammary gland                 |
| BT0266                            | mammary gland                 |
| BT0274                            | mammary gland                 |

| cDNA Library | Designated Tissue for Library |
|--------------|-------------------------------|
| BT0275       | mammary gland                 |
| BT0276       | mammary gland                 |
| BT0277       | mammary gland                 |
| BT0278       | mammary gland                 |
| BT0279       | mammary gland                 |
| BT0280       | mammary gland                 |
| BT0281       | mammary gland                 |
| BT0282       | mammary gland                 |
| BT0283       | mammary gland                 |
| BT0284       | mammary gland                 |
| BT0286       | mammary gland                 |
| BT0287       | mammary gland                 |
| BT0291       | mammary gland                 |
| BT0292       | mammary gland                 |
| BT0293       | mammary gland                 |
| BT0294       | mammary gland                 |
| BT0295       | mammary gland                 |
| BT0296       | mammary gland                 |
| BT0297       | mammary gland                 |
| BT0300       | mammary gland                 |
| BT0301       | mammary gland                 |
| BT0302       | mammary gland                 |
| BT0303       | mammary gland                 |
| BT0304       | mammary gland                 |
| BT0305       | mammary gland                 |
| BT0306       | mammary gland                 |
| BT0308       | mammary gland                 |
| BT0309       | mammary gland                 |
| BT0310       | mammary gland                 |
| BT0311       | mammary gland                 |
| BT0312       | mammary gland                 |
| BT0313       | mammary gland                 |
| BT0314       | mammary gland                 |
| BT0316       | mammary gland                 |
| BT0317       | mammary gland                 |
| BT0318       | mammary gland                 |
| BT0319       | mammary gland                 |
| BT0320       | mammary gland                 |
| BT0321       | mammary gland                 |
| BT0322       | mammary gland                 |

| cDNA Library | Designated Tissue for Library |
|--------------|-------------------------------|
| BT0324       | mammary gland                 |
| BT0325       | mammary gland                 |
| BT0326       | mammary gland                 |
| BT0327       | mammary gland                 |
| BT0329       | mammary gland                 |
| BT0332       | mammary gland                 |
| BT0333       | mammary gland                 |
| BT0335       | mammary gland                 |
| BT0336       | mammary gland                 |
| BT0338       | mammary gland                 |
| BT0339       | mammary gland                 |
| BT0340       | mammary gland                 |
| BT0341       | mammary gland                 |
| BT0346       | mammary gland                 |
| BT0348       | mammary gland                 |
| BT0349       | mammary gland                 |
| BT0350       | mammary gland                 |
| BT0362       | mammary gland                 |
| BT0364       | mammary gland                 |
| BT0365       | mammary gland                 |
| BT0366       | mammary gland                 |
| BT0367       | mammary gland                 |
| BT0368       | mammary gland                 |
| BT0375       | mammary gland                 |
| BT0377       | mammary gland                 |
| BT0379       | mammary gland                 |
| BT0380       | mammary gland                 |
| BT0381       | mammary gland                 |
| BT0382       | mammary gland                 |
| BT0383       | mammary gland                 |
| BT0385       | mammary gland                 |
| BT0386       | mammary gland                 |
| BT0387       | mammary gland                 |
| BT0388       | mammary gland                 |
| BT0391       | mammary gland                 |
| BT0393       | mammary gland                 |
| BT0396       | mammary gland                 |
| BT0397       | mammary gland                 |
| BT0401       | mammary gland                 |
| BT0500       | mammary gland                 |

| cDNA Library | Designated Tissue for Library |
|--------------|-------------------------------|
| BT0502       | mammary gland                 |
| BT0503       | mammary gland                 |
| BT0505       | mammary gland                 |
| BT0506       | mammary gland                 |
| BT0508       | mammary gland                 |
| BT0509       | mammary gland                 |
| BT0510       | mammary gland                 |
| BT0511       | mammary gland                 |
| BT0513       | mammary gland                 |
| BT0515       | mammary gland                 |
| BT0518       | mammary gland                 |
| BT0519       | mammary gland                 |
| BT0520       | mammary gland                 |
| BT0522       | mammary gland                 |
| BT0523       | mammary gland                 |
| BT0524       | mammary gland                 |
| BT0531       | mammary gland                 |
| BT0533       | mammary gland                 |
| BT0534       | mammary gland                 |
| BT0536       | mammary gland                 |
| BT0537       | mammary gland                 |
| BT0538       | mammary gland                 |
| BT0539       | mammary gland                 |
| BT0542       | mammary gland                 |
| BT0543       | mammary gland                 |
| BT0545       | mammary gland                 |
| BT0546       | mammary gland                 |
| BT0547       | mammary gland                 |
| BT0548       | mammary gland                 |
| BT0549       | mammary gland                 |
| BT0552       | mammary gland                 |
| BT0556       | mammary gland                 |
| BT0558       | mammary gland                 |
| BT0560       | mammary gland                 |
| BT0567       | mammary gland                 |
| BT0568       | mammary gland                 |
| CT0017       | colon                         |
| CT0056       | colon                         |
| CT0057       | colon                         |
| CT0058       | colon                         |

| cDNA Library | Designated Tissue for Library |
|--------------|-------------------------------|
| CT0059       | colon                         |
| CT0061       | colon                         |
| CT0115       | colon                         |
| CT0116       | colon                         |
| CT0121       | colon                         |
| CT0147       | colon                         |
| CT0152       | colon                         |
| CT0173       | colon                         |
| CT0175       | colon                         |
| CT0178       | colon                         |
| CT0179       | colon                         |
| CT0180       | colon                         |
| CT0181       | colon                         |
| CT0186       | colon                         |
| CT0189       | colon                         |
| CT0192       | colon                         |
| CT0194       | colon                         |
| CT0195       | colon                         |
| CT0204       | colon                         |
| CT0205       | colon                         |
| CT0206       | colon                         |
| CT0207       | colon                         |
| CT0208       | colon                         |
| CT0209       | colon                         |
| CT0210       | colon                         |
| CT0212       | colon                         |
| CT0213       | colon                         |
| CT0214       | colon                         |
| CT0219       | colon                         |
| CT0220       | colon                         |
| CT0222       | colon                         |
| CT0223       | colon                         |
| CT0224       | colon                         |
| CT0225       | colon                         |
| CT0227       | colon                         |
| CT0236       | colon                         |
| CT0237       | colon                         |
| CT0238       | colon                         |
| CT0239       | colon                         |
| CT0240       | colon                         |

| cDNA Library | Designated Tissue for Library |
|--------------|-------------------------------|
| CT0241       | colon                         |
| CT0242       | colon                         |
| CT0243       | colon                         |
| CT0244       | colon                         |
| CT0245       | colon                         |
| CT0246       | colon                         |
| CT0247       | colon                         |
| CT0248       | colon                         |
| CT0249       | colon                         |
| CT0250       | colon                         |
| CT0251       | colon                         |
| CT0252       | colon                         |
| CT0253       | colon                         |
| CT0254       | colon                         |
| CT0255       | colon                         |
| CT0256       | colon                         |
| CT0257       | colon                         |
| CT0260       | colon                         |
| CT0261       | colon                         |
| CT0263       | colon                         |
| CT0264       | colon                         |
| CT0265       | colon                         |
| CT0266       | colon                         |
| CT0267       | colon                         |
| CT0268       | colon                         |
| CT0275       | colon                         |
| CT0276       | colon                         |
| CT0277       | colon                         |
| CT0278       | colon                         |
| CT0279       | colon                         |
| CT0280       | colon                         |
| CT0281       | colon                         |
| CT0282       | colon                         |
| CT0283       | colon                         |
| CT0284       | colon                         |
| CT0285       | colon                         |
| CT0286       | colon                         |
| CT0287       | colon                         |
| CT0288       | colon                         |
| CT0289       | colon                         |

| cDNA Library | Designated Tissue for Library |
|--------------|-------------------------------|
| CT0290       | colon                         |
| CT0291       | colon                         |
| CT0292       | colon                         |
| CT0293       | colon                         |
| CT0294       | colon                         |
| CT0295       | colon                         |
| CT0297       | colon                         |
| CT0298       | colon                         |
| CT0299       | colon                         |
| CT0300       | colon                         |
| CT0301       | colon                         |
| CT0302       | colon                         |
| CT0303       | colon                         |
| CT0304       | colon                         |
| CT0305       | colon                         |
| CT0306       | colon                         |
| CT0307       | colon                         |
| CT0308       | colon                         |
| CT0309       | colon                         |
| CT0311       | colon                         |
| CT0312       | colon                         |
| CT0313       | colon                         |
| CT0314       | colon                         |
| CT0315       | colon                         |
| CT0317       | colon                         |
| CT0318       | colon                         |
| CT0320       | colon                         |
| CT0321       | colon                         |
| CT0322       | colon                         |
| CT0323       | colon                         |
| CT0324       | colon                         |
| CT0325       | colon                         |
| CT0326       | colon                         |
| CT0328       | colon                         |
| CT0329       | colon                         |
| CT0330       | colon                         |
| SN0034       | stomach                       |
| SN0035       | stomach                       |
| SN0036       | stomach                       |
| SN0037       | stomach                       |

| cDNA Library | Designated Tissue for Library |
|--------------|-------------------------------|
| SN0038       | stomach                       |
| SN0039       | stomach                       |
| SN0040       | stomach                       |
| SN0042       | stomach                       |
| SN0043       | stomach                       |
| SN0044       | stomach                       |
| SN0045       | stomach                       |
| SN0046       | stomach                       |
| SN0047       | stomach                       |
| SN0052       | stomach                       |
| SN0056       | stomach                       |
| SN0060       | stomach                       |
| SN0061       | stomach                       |
| SN0062       | stomach                       |
| SN0063       | stomach                       |
| SN0064       | stomach                       |
| SN0065       | stomach                       |
| SN0066       | stomach                       |
| SN0067       | stomach                       |
| SN0068       | stomach                       |
| SN0070       | stomach                       |
| SN0071       | stomach                       |
| SN0072       | stomach                       |
| SN0073       | stomach                       |
| SN0074       | stomach                       |
| SN0075       | stomach                       |
| PT0010       | uncharacterized tissue        |
| PT0011       | uncharacterized tissue        |
| PT0022       | uncharacterized tissue        |
| PT0034       | uncharacterized tissue        |
| PT0039       | uncharacterized tissue        |
| PT0051       | uncharacterized tissue        |
| PT0052       | uncharacterized tissue        |
| PT0053       | uncharacterized tissue        |
| PT0054       | uncharacterized tissue        |
| PT0073       | uncharacterized tissue        |
| OT0005       | ovary                         |
| OT0006       | ovary                         |
| OT0007       | ovary                         |
| OT00078      | ovary                         |

| cDNA Library | Designated Tissue for Library |
|--------------|-------------------------------|
| OT0008       | ovary                         |
| OT0009       | ovary                         |
| OT0010       | ovary                         |
| OT0011       | ovary                         |
| OT0012       | ovary                         |
| OT0014       | ovary                         |
| OT0015       | ovary                         |
| OT0019       | ovary                         |
| OT0022       | ovary                         |
| OT0024       | ovary                         |
| OT0025       | ovary                         |
| OT0028       | ovary                         |
| OT0029       | ovary                         |
| OT0030       | ovary                         |
| OT0031       | ovary                         |
| OT0032       | ovary                         |
| OT0033       | ovary                         |
| OT0035       | ovary                         |
| OT0036       | ovary                         |
| OT0037       | ovary                         |
| OT0039       | ovary                         |
| OT0040       | ovary                         |
| OT0043       | ovary                         |
| OT0044       | ovary                         |
| OT0045       | ovary                         |
| OT0046       | ovary                         |
| OT0048       | ovary                         |
| OT0049       | ovary                         |
| OT0050       | ovary                         |
| OT0051       | ovary                         |
| OT0053       | ovary                         |
| OT0054       | ovary                         |
| OT0055       | ovary                         |
| OT0057       | ovary                         |
| OT0058       | ovary                         |
| OT0062       | ovary                         |
| OT0063       | ovary                         |
| OT0064       | ovary                         |
| OT0065       | ovary                         |
| OT0066       | ovary                         |

| cDNA Library                           | Designated Tissue for Library |
|----------------------------------------|-------------------------------|
| OT0067                                 | ovary                         |
| OT0068                                 | ovary                         |
| OT0069                                 | ovary                         |
| OT0071                                 | ovary                         |
| OT0072                                 | ovary                         |
| OT0073                                 | ovary                         |
| OT0075                                 | ovary                         |
| OT0076                                 | ovary                         |
| OT00778                                | ovary                         |
| OT0078                                 | ovary                         |
| OT0079                                 | ovary                         |
| OT0080                                 | ovary                         |
| OT0081                                 | ovary                         |
| OT0082                                 | ovary                         |
| OT0083                                 | ovary                         |
| OT0084                                 | ovary                         |
| OT0086                                 | ovary                         |
| OT0088                                 | ovary                         |
| OT0089                                 | ovary                         |
| OT0091                                 | ovary                         |
| OT0092                                 | ovary                         |
| OT0093                                 | ovary                         |
| OT0094                                 | ovary                         |
| OT0095                                 | ovary                         |
| OT0096                                 | ovary                         |
| OT0708                                 | ovary                         |
| Human matrix tissue expression library | uncharacterized tissue        |
| NN0001                                 | cerebrum                      |
| NN0003                                 | cerebrum                      |
| NN0004                                 | cerebrum                      |
| NN0005                                 | cerebrum                      |
| NN0006                                 | cerebrum                      |
| NN0007                                 | cerebrum                      |
| NN0008                                 | cerebrum                      |
| NN0009                                 | cerebrum                      |
| NN0010                                 | cerebrum                      |
| NN0011                                 | cerebrum                      |
| NN0012                                 | cerebrum                      |
| NN0021                                 | cerebrum                      |
| NN0023                                 | cerebrum                      |

| cDNA Library | Designated Tissue for Library |
|--------------|-------------------------------|
| NN0024       | cerebrum                      |
| NN0025       | cerebrum                      |
| NN0026       | cerebrum                      |
| NN0027       | cerebrum                      |
| NN0028       | cerebrum                      |
| NN0030       | cerebrum                      |
| NN0031       | cerebrum                      |
| NN0032       | cerebrum                      |
| NN0033       | cerebrum                      |
| NN0034       | cerebrum                      |
| NN0035       | cerebrum                      |
| NN0036       | cerebrum                      |
| NN0037       | cerebrum                      |
| NN0038       | cerebrum                      |
| NN0039       | cerebrum                      |
| NN0040       | cerebrum                      |
| NN0041       | cerebrum                      |
| NN0046       | cerebrum                      |
| NN0047       | cerebrum                      |
| NN0048       | cerebrum                      |
| NN0049       | cerebrum                      |
| NN0050       | cerebrum                      |
| NN0051       | cerebrum                      |
| NN0052       | cerebrum                      |
| NN0053       | cerebrum                      |
| NN0054       | cerebrum                      |
| NN0055       | cerebrum                      |
| NN0056       | cerebrum                      |
| NN0057       | cerebrum                      |
| NN0058       | cerebrum                      |
| NN0059       | cerebrum                      |
| NN0060       | cerebrum                      |
| NN0061       | cerebrum                      |
| NN0062       | cerebrum                      |
| NN0063       | cerebrum                      |
| NN0064       | cerebrum                      |
| NN0066       | cerebrum                      |
| NN0067       | cerebrum                      |
| NN0068       | cerebrum                      |
| NN0070       | cerebrum                      |

| cDNA Library | Designated Tissue for Library |
|--------------|-------------------------------|
| NN0071       | cerebrum                      |
| NN0072       | cerebrum                      |
| NN0073       | cerebrum                      |
| NN0074       | cerebrum                      |
| NN0075       | cerebrum                      |
| NN0076       | cerebrum                      |
| NN0078       | cerebrum                      |
| NN0079       | cerebrum                      |
| NN0080       | cerebrum                      |
| NN0081       | cerebrum                      |
| NN0082       | cerebrum                      |
| NN0083       | cerebrum                      |
| NN0084       | cerebrum                      |
| NN0087       | cerebrum                      |
| NN0088       | cerebrum                      |
| NN0089       | cerebrum                      |
| NN0090       | cerebrum                      |
| NN0091       | cerebrum                      |
| NN0092       | cerebrum                      |
| NN1002       | cerebrum                      |
| NN1003       | cerebrum                      |
| NN1004       | cerebrum                      |
| NN1005       | cerebrum                      |
| NN1006       | cerebrum                      |
| NN1008       | cerebrum                      |
| NN1009       | cerebrum                      |
| NN1010       | cerebrum                      |
| NN1011       | cerebrum                      |
| NN1012       | cerebrum                      |
| NN1013       | cerebrum                      |
| NN1014       | cerebrum                      |
| NN1015       | cerebrum                      |
| NN1018       | cerebrum                      |
| NN1020       | cerebrum                      |
| NN1021       | cerebrum                      |
| NN1022       | cerebrum                      |
| NN1023       | cerebrum                      |
| NN1024       | cerebrum                      |
| NN1025       | cerebrum                      |
| NN1026       | cerebrum                      |

| cDNA Library | Designated Tissue for Library |
|--------------|-------------------------------|
| NN1027       | cerebrum                      |
| NN1028       | cerebrum                      |
| NN1029       | cerebrum                      |
| NN1030       | cerebrum                      |
| NN1031       | cerebrum                      |
| NN1032       | cerebrum                      |
| NN1037       | cerebrum                      |
| NN1038       | cerebrum                      |
| NN1039       | cerebrum                      |
| NN1040       | cerebrum                      |
| NN1041       | cerebrum                      |
| NN1043       | cerebrum                      |
| NN1044       | cerebrum                      |
| NN1046       | cerebrum                      |
| NN1047       | cerebrum                      |
| NN1048       | cerebrum                      |
| NN1050       | cerebrum                      |
| NN1055       | cerebrum                      |
| NN1059       | cerebrum                      |
| NN1060       | cerebrum                      |
| NN1061       | cerebrum                      |
| NN1062       | cerebrum                      |
| NN1063       | cerebrum                      |
| NN1064       | cerebrum                      |
| NN1065       | cerebrum                      |
| NN1066       | cerebrum                      |
| NN1067       | cerebrum                      |
| NN1071       | cerebrum                      |
| NN1072       | cerebrum                      |
| NN1073       | cerebrum                      |
| NN1080       | cerebrum                      |
| NN1082       | cerebrum                      |
| NN1083       | cerebrum                      |
| NN1084       | cerebrum                      |
| NN1085       | cerebrum                      |
| NN1086       | cerebrum                      |
| NN1089       | cerebrum                      |
| NT0002       | brain                         |
| NT0003       | brain                         |
| NT0004       | brain                         |

| cDNA Library | Designated Tissue for Library |
|--------------|-------------------------------|
| NT0005       | brain                         |
| NT0006       | brain                         |
| NT0007       | brain                         |
| NT0010       | brain                         |
| NT0011       | brain                         |
| NT0012       | brain                         |
| NT0013       | brain                         |
| NT0014       | brain                         |
| NT0015       | brain                         |
| NT0020       | brain                         |
| NT0027       | brain                         |
| NT0028       | brain                         |
| NT0029       | brain                         |
| NT0031       | brain                         |
| NT0032       | brain                         |
| NT0033       | brain                         |
| NT0035       | brain                         |
| NT0036       | brain                         |
| NT0037       | brain                         |
| NT0038       | brain                         |
| NT0039       | brain                         |
| NT0040       | brain                         |
| NT0045       | brain                         |
| NT0052       | brain                         |
| NT0053       | brain                         |
| NT0054       | brain                         |
| NT0057       | brain                         |
| NT0058       | brain                         |
| NT0072       | brain                         |
| NT0073       | brain                         |
| NT0075       | brain                         |
| NT0076       | brain                         |
| NT0077       | brain                         |
| NT0078       | brain                         |
| NT0079       | brain                         |
| NT0080       | brain                         |
| NT0081       | brain                         |
| NT0082       | brain                         |
| NT0083       | brain                         |
| NT0084       | brain                         |

| cDNA Library                     | Designated Tissue for Library |
|----------------------------------|-------------------------------|
| NT0088                           | brain                         |
| NT0089                           | brain                         |
| NT0090                           | brain                         |
| NT0118                           | brain                         |
| NT0119                           | brain                         |
| NT0120                           | brain                         |
| Homo sapiens liver 16 week fetus | uncharacterized tissue        |
| LST1                             | uncharacterized tissue        |
| DT0023                           | uncharacterized tissue        |
| DT0024                           | uncharacterized tissue        |
| DT0033                           | uncharacterized tissue        |
| DT0038                           | uncharacterized tissue        |
| DT0047                           | uncharacterized tissue        |
| DT0048                           | uncharacterized tissue        |
| DT0059                           | uncharacterized tissue        |
| DT0060                           | uncharacterized tissue        |
| DT0066                           | uncharacterized tissue        |
| DT0068                           | uncharacterized tissue        |
| DT0071                           | uncharacterized tissue        |
| DT0077                           | uncharacterized tissue        |
| DT0078                           | uncharacterized tissue        |
| DT0079                           | uncharacterized tissue        |
| MAGE resequences, MAGA           | uncharacterized tissue        |
| EN0001                           | lung                          |
| EN0002                           | lung                          |
| EN0003                           | lung                          |
| EN0004                           | lung                          |
| EN0005                           | lung                          |
| EN0006                           | lung                          |
| EN0007                           | lung                          |
| EN0008                           | lung                          |
| EN0011                           | lung                          |
| EN0012                           | lung                          |
| EN0013                           | lung                          |
| EN0014                           | lung                          |
| EN0020                           | lung                          |
| EN0022                           | lung                          |
| EN0024                           | lung                          |
| EN0027                           | lung                          |
| EN0032                           | lung                          |

| cDNA Library | Designated Tissue for Library |
|--------------|-------------------------------|
| EN0040       | lung                          |
| ET0001       | lung                          |
| ET0017       | lung                          |
| ET0018       | lung                          |
| ET0019       | lung                          |
| ET0020       | lung                          |
| ET0021       | lung                          |
| ET0022       | lung                          |
| ET0023       | lung                          |
| ET0024       | lung                          |
| ET0027       | lung                          |
| ET0039       | lung                          |
| ET0040       | lung                          |
| ET0041       | lung                          |
| MT0002       | whole blood                   |
| MT0003       | whole blood                   |
| MT0004       | whole blood                   |
| MT0005       | whole blood                   |
| MT0006       | whole blood                   |
| MT0007       | whole blood                   |
| MT0008       | whole blood                   |
| MT0009       | whole blood                   |
| MT0010       | whole blood                   |
| MT0011       | whole blood                   |
| MT0012       | whole blood                   |
| MT0013       | whole blood                   |
| MT0014       | whole blood                   |
| MT0015       | whole blood                   |
| FN0040       | prostate                      |
| FN0041       | prostate                      |
| FN0042       | prostate                      |
| FN0043       | prostate                      |
| FN0044       | prostate                      |
| FT0001       | prostate                      |
| FT0002       | prostate                      |
| FT0004       | prostate                      |
| FT0005       | prostate                      |
| FT0006       | prostate                      |
| NIH_MGC_53   | genitourinary                 |
| NIH_MGC_54   | bone marrow                   |

| cDNA Library           | Designated Tissue for Library |
|------------------------|-------------------------------|
| NIH_MGC_55             | bone marrow                   |
| NIH_MGC_56             | brain                         |
| NIH_MGC_57             | brain                         |
| NIH_MGC_58             | kidney                        |
| NIH_MGC_59             | salivary gland                |
| NIH_MGC_60             | prostate                      |
| NIH_MGC_61             | testis                        |
| NIH_MGC_62             | skin                          |
| MAGE resequences, MAGB | uncharacterized tissue        |
| MAGE resequences, MAGC | uncharacterized tissue        |
| MAGE resequences, MAGD | uncharacterized tissue        |
| MAGE resequences, MAGE | uncharacterized tissue        |
| MAGE resequences, MAGF | uncharacterized tissue        |
| MAGE resequences, MAGG | uncharacterized tissue        |
| MAGE resequences, MAGH | uncharacterized tissue        |
| MAGE resequences, MAGI | uncharacterized tissue        |
| MAGE resequences, MAGJ | uncharacterized tissue        |
| MAGE resequences, MAGK | uncharacterized tissue        |
| MAGE resequences, MAGL | uncharacterized tissue        |
| MAGE resequences, MAGM | uncharacterized tissue        |
| MAGE resequences, MAGN | uncharacterized tissue        |
| MAGE resequences, MAGO | uncharacterized tissue        |
| MAGE resequences, MAGP | uncharacterized tissue        |
| HN0001                 | head and neck                 |
| HN0002                 | head and neck                 |
| HN0003                 | head and neck                 |
| HN0004                 | head and neck                 |
| HN0005                 | head and neck                 |
| HN0006                 | head and neck                 |
| HN0007                 | head and neck                 |
| HN0008                 | head and neck                 |
| HN0009                 | head and neck                 |
| HN0010                 | head and neck                 |
| HN0011                 | head and neck                 |
| HN0012                 | head and neck                 |
| HN0013                 | head and neck                 |
| HN0014                 | head and neck                 |
| HN0015                 | head and neck                 |
| BN0006                 | mammary gland                 |
| BN0007                 | mammary gland                 |

| cDNA Library | Designated Tissue for Library |
|--------------|-------------------------------|
| BN0022       | mammary gland                 |
| BN0023       | mammary gland                 |
| BN0024       | mammary gland                 |
| BN0030       | mammary gland                 |
| BN0032       | mammary gland                 |
| BN0033       | mammary gland                 |
| BN0034       | mammary gland                 |
| BN0035       | mammary gland                 |
| BN0036       | mammary gland                 |
| BN0037       | mammary gland                 |
| BN0038       | mammary gland                 |
| BN0039       | mammary gland                 |
| BN0040       | mammary gland                 |
| BN0041       | mammary gland                 |
| BN0042       | mammary gland                 |
| BN0043       | mammary gland                 |
| BN0044       | mammary gland                 |
| BN0045       | mammary gland                 |
| BN0046       | mammary gland                 |
| BN0047       | mammary gland                 |
| BN0048       | mammary gland                 |
| BN0049       | mammary gland                 |
| BN0050       | mammary gland                 |
| BN0051       | mammary gland                 |
| BN0052       | mammary gland                 |
| BN0053       | mammary gland                 |
| BN0054       | mammary gland                 |
| BN0055       | mammary gland                 |
| BN0056       | mammary gland                 |
| BN0057       | mammary gland                 |
| BN0058       | mammary gland                 |
| BN0059       | mammary gland                 |
| BN0060       | mammary gland                 |
| BN0063       | mammary gland                 |
| BN0064       | mammary gland                 |
| BN0065       | mammary gland                 |
| BN0066       | mammary gland                 |
| BN0067       | mammary gland                 |
| BN0068       | mammary gland                 |
| BN0070       | mammary gland                 |

| cDNA Library | Designated Tissue for Library |
|--------------|-------------------------------|
| BN0072       | mammary gland                 |
| BN0073       | mammary gland                 |
| BN0074       | mammary gland                 |
| BN0075       | mammary gland                 |
| BN0077       | mammary gland                 |
| BN0078       | mammary gland                 |
| BN0080       | mammary gland                 |
| BN0081       | mammary gland                 |
| BN0082       | mammary gland                 |
| BN0083       | mammary gland                 |
| BN0084       | mammary gland                 |
| BN0085       | mammary gland                 |
| BN0087       | mammary gland                 |
| BN0090       | mammary gland                 |
| BN0091       | mammary gland                 |
| BN0093       | mammary gland                 |
| BN0095       | mammary gland                 |
| BN0096       | mammary gland                 |
| BN0097       | mammary gland                 |
| BN0101       | mammary gland                 |
| BN0102       | mammary gland                 |
| BN0103       | mammary gland                 |
| BN0105       | mammary gland                 |
| BN0106       | mammary gland                 |
| BN0109       | mammary gland                 |
| BN0111       | mammary gland                 |
| BN0112       | mammary gland                 |
| BN0113       | mammary gland                 |
| BN0114       | mammary gland                 |
| BN0115       | mammary gland                 |
| BN0116       | mammary gland                 |
| BN0117       | mammary gland                 |
| BN0118       | mammary gland                 |
| BN0120       | mammary gland                 |
| BN0121       | mammary gland                 |
| BN0123       | mammary gland                 |
| BN0124       | mammary gland                 |
| BN0125       | mammary gland                 |
| BN0126       | mammary gland                 |
| BN0127       | mammary gland                 |

| cDNA Library | Designated Tissue for Library |
|--------------|-------------------------------|
| BN0128       | mammary gland                 |
| BN0129       | mammary gland                 |
| BN0130       | mammary gland                 |
| BN0131       | mammary gland                 |
| BN0132       | mammary gland                 |
| BN0133       | mammary gland                 |
| BN0136       | mammary gland                 |
| BN0137       | mammary gland                 |
| BN0138       | mammary gland                 |
| BN0139       | mammary gland                 |
| BN0140       | mammary gland                 |
| BN0141       | mammary gland                 |
| BN0142       | mammary gland                 |
| BN0143       | mammary gland                 |
| BN0144       | mammary gland                 |
| BN0146       | mammary gland                 |
| BN0147       | mammary gland                 |
| BN0148       | mammary gland                 |
| BN0151       | mammary gland                 |
| BN0153       | mammary gland                 |
| BN0154       | mammary gland                 |
| BN0155       | mammary gland                 |
| BN0157       | mammary gland                 |
| BN0158       | mammary gland                 |
| BN0159       | mammary gland                 |
| BN0160       | mammary gland                 |
| BN0161       | mammary gland                 |
| BN0162       | mammary gland                 |
| BN0163       | mammary gland                 |
| BN0164       | mammary gland                 |
| BN0165       | mammary gland                 |
| BN0167       | mammary gland                 |
| BN0169       | mammary gland                 |
| BN0170       | mammary gland                 |
| BN0171       | mammary gland                 |
| BN0172       | mammary gland                 |
| BN0173       | mammary gland                 |
| BN0174       | mammary gland                 |
| BN0175       | mammary gland                 |
| BN0176       | mammary gland                 |

| cDNA Library           | Designated Tissue for Library |
|------------------------|-------------------------------|
| BN0180                 | mammary gland                 |
| BN0181                 | mammary gland                 |
| BN0182                 | mammary gland                 |
| BN0183                 | mammary gland                 |
| BN0185                 | mammary gland                 |
| BN0186                 | mammary gland                 |
| BN0189                 | mammary gland                 |
| BN0190                 | mammary gland                 |
| BN0192                 | mammary gland                 |
| BN0193                 | mammary gland                 |
| BN0194                 | mammary gland                 |
| BN0195                 | mammary gland                 |
| BN0196                 | mammary gland                 |
| BN0197                 | mammary gland                 |
| BN0198                 | mammary gland                 |
| BN0217                 | mammary gland                 |
| BN0218                 | mammary gland                 |
| BN0219                 | mammary gland                 |
| BN0220                 | mammary gland                 |
| BN0221                 | mammary gland                 |
| BN0222                 | mammary gland                 |
| BN0223                 | mammary gland                 |
| BN0224                 | mammary gland                 |
| BN0225                 | mammary gland                 |
| BN0228                 | mammary gland                 |
| BN0230                 | mammary gland                 |
| BN0231                 | mammary gland                 |
| BN1057                 | mammary gland                 |
| BN1058                 | mammary gland                 |
| Human fetal brain cDNA | uncharacterized tissue        |
| SAGE_Panc_91-16113     | pancreas                      |
| SAGE_Panc_96-6252      | pancreas                      |
| NCI_CGAP_Skn1          | skin                          |
| BT0271                 | mammary gland                 |
| BT0273                 | mammary gland                 |
| BT0337                 | mammary gland                 |
| BT0347                 | mammary gland                 |
| BT0369                 | mammary gland                 |
| BT0370                 | mammary gland                 |
| BT0371                 | mammary gland                 |

| cDNA Library | Designated Tissue for Library |
|--------------|-------------------------------|
| BT0374       | mammary gland                 |
| BT0389       | mammary gland                 |
| BT0404       | mammary gland                 |
| BT0405       | mammary gland                 |
| BT0406       | mammary gland                 |
| BT0414       | mammary gland                 |
| BT0521       | mammary gland                 |
| BT0550       | mammary gland                 |
| BT0551       | mammary gland                 |
| BT0570       | mammary gland                 |
| BT0571       | mammary gland                 |
| BT0572       | mammary gland                 |
| BT0575       | mammary gland                 |
| BT0576       | mammary gland                 |
| BT0577       | mammary gland                 |
| BT0578       | mammary gland                 |
| BT0580       | mammary gland                 |
| BT0587       | mammary gland                 |
| BT0589       | mammary gland                 |
| BT0590       | mammary gland                 |
| BT0591       | mammary gland                 |
| BT0594       | mammary gland                 |
| BT0598       | mammary gland                 |
| BT0599       | mammary gland                 |
| BT0610       | mammary gland                 |
| BT0611       | mammary gland                 |
| BT0612       | mammary gland                 |
| BT0613       | mammary gland                 |
| BT0614       | mammary gland                 |
| BT0615       | mammary gland                 |
| BT0617       | mammary gland                 |
| BT0618       | mammary gland                 |
| BT0619       | mammary gland                 |
| BT0620       | mammary gland                 |
| BT0621       | mammary gland                 |
| BT0623       | mammary gland                 |
| BT0624       | mammary gland                 |
| BT0625       | mammary gland                 |
| BT0626       | mammary gland                 |
| BT0627       | mammary gland                 |

| cDNA Library | Designated Tissue for Library |
|--------------|-------------------------------|
| BT0628       | mammary gland                 |
| BT0629       | mammary gland                 |
| BT0630       | mammary gland                 |
| BT0631       | mammary gland                 |
| BT0632       | mammary gland                 |
| BT0633       | mammary gland                 |
| BT0635       | mammary gland                 |
| BT0636       | mammary gland                 |
| BT0637       | mammary gland                 |
| BT0638       | mammary gland                 |
| BT0639       | mammary gland                 |
| BT0640       | mammary gland                 |
| BT0641       | mammary gland                 |
| BT0642       | mammary gland                 |
| BT0643       | mammary gland                 |
| BT0644       | mammary gland                 |
| BT0645       | mammary gland                 |
| BT0646       | mammary gland                 |
| BT0649       | mammary gland                 |
| BT0650       | mammary gland                 |
| BT0651       | mammary gland                 |
| BT0652       | mammary gland                 |
| BT0653       | mammary gland                 |
| BT0654       | mammary gland                 |
| BT0655       | mammary gland                 |
| BT0656       | mammary gland                 |
| BT0657       | mammary gland                 |
| BT0659       | mammary gland                 |
| BT0663       | mammary gland                 |
| BT0664       | mammary gland                 |
| BT0665       | mammary gland                 |
| BT0666       | mammary gland                 |
| BT0667       | mammary gland                 |
| BT0669       | mammary gland                 |
| BT0670       | mammary gland                 |
| BT0671       | mammary gland                 |
| BT0672       | mammary gland                 |
| BT0673       | mammary gland                 |
| BT0675       | mammary gland                 |
| BT0677       | mammary gland                 |

| cDNA Library | Designated Tissue for Library |
|--------------|-------------------------------|
| BT0678       | mammary gland                 |
| BT0679       | mammary gland                 |
| BT0680       | mammary gland                 |
| BT0681       | mammary gland                 |
| BT0682       | mammary gland                 |
| BT0686       | mammary gland                 |
| BT0687       | mammary gland                 |
| BT0688       | mammary gland                 |
| BT0689       | mammary gland                 |
| BT0690       | mammary gland                 |
| BT0691       | mammary gland                 |
| BT0693       | mammary gland                 |
| BT0694       | mammary gland                 |
| BT0695       | mammary gland                 |
| BT0696       | mammary gland                 |
| BT0698       | mammary gland                 |
| BT0700       | mammary gland                 |
| BT0701       | mammary gland                 |
| BT0702       | mammary gland                 |
| BT0703       | mammary gland                 |
| BT0704       | mammary gland                 |
| BT0705       | mammary gland                 |
| BT0707       | mammary gland                 |
| BT0708       | mammary gland                 |
| BT0709       | mammary gland                 |
| BT0710       | mammary gland                 |
| BT0711       | mammary gland                 |
| BT0712       | mammary gland                 |
| BT0713       | mammary gland                 |
| BT0714       | mammary gland                 |
| BT0716       | mammary gland                 |
| BT0717       | mammary gland                 |
| BT0718       | mammary gland                 |
| BT0720       | mammary gland                 |
| BT0721       | mammary gland                 |
| BT0722       | mammary gland                 |
| BT0723       | mammary gland                 |
| BT0724       | mammary gland                 |
| BT0725       | mammary gland                 |
| BT0726       | mammary gland                 |

| cDNA Library | Designated Tissue for Library |
|--------------|-------------------------------|
| BT0727       | mammary gland                 |
| BT0728       | mammary gland                 |
| BT0729       | mammary gland                 |
| BT0730       | mammary gland                 |
| BT0731       | mammary gland                 |
| BT0733       | mammary gland                 |
| BT0734       | mammary gland                 |
| BT0738       | mammary gland                 |
| BT0739       | mammary gland                 |
| BT0740       | mammary gland                 |
| BT0741       | mammary gland                 |
| BT0742       | mammary gland                 |
| BT0744       | mammary gland                 |
| BT0746       | mammary gland                 |
| BT0747       | mammary gland                 |
| BT0749       | mammary gland                 |
| BT0750       | mammary gland                 |
| BT0751       | mammary gland                 |
| BT0752       | mammary gland                 |
| BT0753       | mammary gland                 |
| BT0754       | mammary gland                 |
| BT0755       | mammary gland                 |
| BT0756       | mammary gland                 |
| BT0757       | mammary gland                 |
| BT0758       | mammary gland                 |
| BT0759       | mammary gland                 |
| BT0761       | mammary gland                 |
| BT0762       | mammary gland                 |
| BT0763       | mammary gland                 |
| BT0764       | mammary gland                 |
| BT0765       | mammary gland                 |
| BT0768       | mammary gland                 |
| BT0769       | mammary gland                 |
| BT0771       | mammary gland                 |
| BT0772       | mammary gland                 |
| BT0773       | mammary gland                 |
| BT0774       | mammary gland                 |
| BT0775       | mammary gland                 |
| BT0778       | mammary gland                 |
| BT0779       | mammary gland                 |

| cDNA Library                                       | Designated Tissue for Library |
|----------------------------------------------------|-------------------------------|
| BT0782                                             | mammary gland                 |
| BT0783                                             | mammary gland                 |
| BT0785                                             | mammary gland                 |
| BT0790                                             | mammary gland                 |
| BT0791                                             | mammary gland                 |
| BT0798                                             | mammary gland                 |
| BT0880                                             | mammary gland                 |
| Human Epidermal Keratinocyte Subtraction Library   | skin                          |
| NCI_CGAP_Sub8                                      | uncharacterized tissue        |
| NCI_CGAP_HN20                                      | head and neck                 |
| NCI_CGAP_HN21                                      | head and neck                 |
| Human Liver MATCHMAKER cDNA Library(cat.#HL4024AH) | uncharacterized tissue        |
| HT0001                                             | head and neck                 |
| HT0002                                             | head and neck                 |
| HT0003                                             | head and neck                 |
| HT0005                                             | head and neck                 |
| HT0006                                             | head and neck                 |
| HT0007                                             | head and neck                 |
| HT0008                                             | head and neck                 |
| HT0011                                             | head and neck                 |
| HT0014                                             | head and neck                 |
| HT0015                                             | head and neck                 |
| HT0016                                             | head and neck                 |
| HT0024                                             | head and neck                 |
| HT0378                                             | head and neck                 |
| HT0379                                             | head and neck                 |
| HT0404                                             | thyroid                       |
| HT0405                                             | thyroid                       |
| HT0406                                             | thyroid                       |
| HT0408                                             | thyroid                       |
| HT0412                                             | thyroid                       |
| HT0424                                             | thyroid                       |
| HT0436                                             | thyroid                       |
| HT0437                                             | thyroid                       |
| HT0446                                             | thyroid                       |
| HT0447                                             | thyroid                       |
| HT0448                                             | thyroid                       |
| HT0457                                             | thyroid                       |
| HT0458                                             | thyroid                       |
| HT0460                                             | thyroid                       |

| cDNA Library | Designated Tissue for Library |
|--------------|-------------------------------|
| HT0461       | thyroid                       |
| HT0463       | thyroid                       |
| HT0464       | thyroid                       |
| HT0471       | thyroid                       |
| HT0472       | thyroid                       |
| HT0473       | thyroid                       |
| HT0474       | thyroid                       |
| HT0475       | thyroid                       |
| HT0489       | thyroid                       |
| HT0490       | thyroid                       |
| HT0493       | thyroid                       |
| HT0494       | thyroid                       |
| HT0495       | thyroid                       |
| HT0499       | thyroid                       |
| HT0501       | thyroid                       |
| HT0502       | thyroid                       |
| HT0508       | thyroid                       |
| HT0509       | thyroid                       |
| HT0511       | thyroid                       |
| HT0512       | thyroid                       |
| HT0513       | thyroid                       |
| HT0514       | thyroid                       |
| HT0515       | thyroid                       |
| HT0516       | thyroid                       |
| HT0517       | thyroid                       |
| HT0518       | thyroid                       |
| HT0520       | thyroid                       |
| HT0521       | thyroid                       |
| HT0522       | thyroid                       |
| HT0524       | thyroid                       |
| HT0525       | thyroid                       |
| HT0527       | thyroid                       |
| HT0529       | thyroid                       |
| HT0530       | thyroid                       |
| HT0532       | thyroid                       |
| HT0534       | thyroid                       |
| HT0535       | thyroid                       |
| HT0536       | thyroid                       |
| HT0537       | thyroid                       |
| HT0538       | thyroid                       |

| cDNA Library | Designated Tissue for Library |
|--------------|-------------------------------|
| HT0539       | thyroid                       |
| HT0543       | thyroid                       |
| HT0544       | thyroid                       |
| HT0545       | thyroid                       |
| HT0546       | thyroid                       |
| HT0547       | thyroid                       |
| HT0548       | thyroid                       |
| HT0550       | thyroid                       |
| HT0551       | thyroid                       |
| HT0552       | thyroid                       |
| HT0555       | thyroid                       |
| HT0556       | thyroid                       |
| HT0557       | thyroid                       |
| HT0558       | thyroid                       |
| HT0559       | thyroid                       |
| HT0560       | thyroid                       |
| HT0561       | thyroid                       |
| HT0562       | thyroid                       |
| HT0564       | thyroid                       |
| HT0565       | thyroid                       |
| HT0567       | thyroid                       |
| HT0569       | thyroid                       |
| HT0572       | thyroid                       |
| HT0573       | thyroid                       |
| HT0574       | thyroid                       |
| HT0575       | thyroid                       |
| HT0577       | thyroid                       |
| HT0578       | thyroid                       |
| HT0580       | thyroid                       |
| HT0581       | thyroid                       |
| HT0582       | thyroid                       |
| HT0583       | thyroid                       |
| HT0584       | thyroid                       |
| HT0585       | thyroid                       |
| HT0586       | thyroid                       |
| HT0587       | thyroid                       |
| HT0588       | thyroid                       |
| HT0592       | thyroid                       |
| HT0593       | thyroid                       |
| HT0595       | thyroid                       |

| cDNA Library | Designated Tissue for Library |
|--------------|-------------------------------|
| HT0596       | thyroid                       |
| HT0597       | thyroid                       |
| HT0598       | thyroid                       |
| HT0600       | thyroid                       |
| HT0603       | thyroid                       |
| HT0604       | thyroid                       |
| HT0605       | thyroid                       |
| HT0606       | thyroid                       |
| HT0607       | thyroid                       |
| HT0608       | thyroid                       |
| HT0609       | thyroid                       |
| HT0612       | thyroid                       |
| HT0613       | thyroid                       |
| HT0615       | thyroid                       |
| HT0618       | thyroid                       |
| HT0621       | thyroid                       |
| HT0622       | thyroid                       |
| HT0623       | thyroid                       |
| HT0625       | thyroid                       |
| HT0626       | thyroid                       |
| HT0627       | head and neck                 |
| HT0628       | head and neck                 |
| HT0629       | head and neck                 |
| HT0630       | head and neck                 |
| HT0631       | head and neck                 |
| HT0632       | head and neck                 |
| HT0633       | head and neck                 |
| HT0634       | head and neck                 |
| HT0635       | head and neck                 |
| HT0638       | head and neck                 |
| HT0639       | head and neck                 |
| HT0641       | head and neck                 |
| HT0642       | head and neck                 |
| HT0643       | head and neck                 |
| HT0644       | head and neck                 |
| HT0645       | head and neck                 |
| HT0646       | head and neck                 |
| HT0647       | head and neck                 |
| HT0648       | head and neck                 |
| HT0649       | head and neck                 |

| cDNA Library                        | Designated Tissue for Library |
|-------------------------------------|-------------------------------|
| HT0650                              | head and neck                 |
| HT0651                              | head and neck                 |
| HT0652                              | head and neck                 |
| HT0653                              | head and neck                 |
| HT0654                              | head and neck                 |
| HT0655                              | head and neck                 |
| HT0657                              | head and neck                 |
| HT0658                              | head and neck                 |
| HT0664                              | head and neck                 |
| HT0668                              | head and neck                 |
| HT0669                              | head and neck                 |
| HT0670                              | head and neck                 |
| HT0671                              | head and neck                 |
| HT0672                              | head and neck                 |
| HT0673                              | head and neck                 |
| HT0674                              | head and neck                 |
| HT0675                              | head and neck                 |
| HT0676                              | head and neck                 |
| HT0677                              | head and neck                 |
| HT0683                              | head and neck                 |
| HT0685                              | head and neck                 |
| HT0686                              | head and neck                 |
| HT0688                              | head and neck                 |
| HT0689                              | head and neck                 |
| HT0691                              | head and neck                 |
| HT0707                              | head and neck                 |
| HT0709                              | head and neck                 |
| HT0729                              | head and neck                 |
| HT0730                              | head and neck                 |
| HT0731                              | head and neck                 |
| HT0738                              | head and neck                 |
| SAGE_SciencePark_MCF7_control_3h    | mammary gland                 |
| SAGE_SciencePark_MCF7_Control_0h    | mammary gland                 |
| SAGE_SciencePark_MCF7_estradiol_3h  | mammary gland                 |
| SAGE_SciencePark_MCF7_estradiol_10h | mammary gland                 |
| SAGE_lacZ                           | mammary gland                 |
| SAGE_PTEN                           | mammary gland                 |
| Homo sapiens express Library        | uncharacterized tissue        |
| Homo sapiens astrocytoma            | uncharacterized tissue        |
| SAGE_95-347                         | mammary gland                 |

| cDNA Library                                                     | Designated Tissue for Library |
|------------------------------------------------------------------|-------------------------------|
| SAGE_95-259                                                      | mammary gland                 |
| Homo sapiens adult T-cell leukemia cell line JuanaW              | uncharacterized tissue        |
| Homo sapiens stomach cancer                                      | uncharacterized tissue        |
| SAGE_95-260                                                      | mammary gland                 |
| SAGE_95-348                                                      | mammary gland                 |
| Homo sapiens library (Zhao JR)                                   | uncharacterized tissue        |
| Homo sapiens cartilage                                           | uncharacterized tissue        |
| HEL cell line cDNA library                                       | uncharacterized tissue        |
| Pediatric acute myelogenous leukemia cell (FAB M1) Baylor-HGSC   | bone marrow                   |
| Pediatric pre-B cell acute lymphoblastic leukemia Baylor-HGSC    | lymph node                    |
| RACE product                                                     | uncharacterized tissue        |
| SAGE_D283                                                        | uncharacterized tissue        |
| SAGE_4-HCR                                                       | uncharacterized tissue        |
| human bone marrow cDNA library                                   | uncharacterized tissue        |
| Human umbilical vein cord                                        | uncharacterized tissue        |
| HTM1                                                             | bone                          |
| Differentiation Display RT-PCR of human alveolar macrophage mRNA | uncharacterized tissue        |
| SAGE_Ped_GBM1062                                                 | brain                         |
| Retinoic acid-induced differential display cDNA library          | uncharacterized tissue        |
| suppression subtractive hybridization library SEC1               | uncharacterized tissue        |
| estradiol-responsive cDNAs from MCF7 cell line                   | uncharacterized tissue        |
| Homo sapiens adult T-cell leukemia cell line JuaW                | uncharacterized tissue        |
| Homo sapiens HTLV-1 transformed T cell line C91-PL               | uncharacterized tissue        |
| human B lymphocyte cDNA library                                  | uncharacterized tissue        |
| NIH_MGC_73                                                       | brain                         |
| NIH_MGC_74                                                       | heart                         |
| NIH_MGC_76                                                       | liver                         |
| NIH_MGC_81                                                       | muscle                        |
| NIH_MGC_82                                                       | testis                        |
| Homo sapiens colon cancer                                        | uncharacterized tissue        |
| cDNA from T84 cells                                              | uncharacterized tissue        |
| gastrocarcinoma tissue cDNA library                              | uncharacterized tissue        |
| Homo sapiens bone marrow                                         | uncharacterized tissue        |
| Homo sapiens fetal cerebral cortex mRNA                          | uncharacterized tissue        |
| GLA                                                              | uncharacterized tissue        |
| GLC                                                              | liver                         |
| GLD                                                              | uncharacterized tissue        |
| NIH_MGC_65                                                       | colon                         |
| NIH_MGC_67                                                       | eye                           |
| NIH_MGC_68                                                       | lung                          |

| cDNA Library                            | Designated Tissue for Library |
|-----------------------------------------|-------------------------------|
| NIH_MGC_69                              | lung                          |
| NIH_MGC_70                              | pancreas                      |
| NIH_MGC_72                              | skin                          |
| NIH_MGC_66                              | ovary                         |
| NIH_MGC_71                              | uterus                        |
| colon carcinoma tissue cDNA library     | uncharacterized tissue        |
| 3.4 (downregulated in larynx carcinoma) | uncharacterized tissue        |
| 3.3 (upregulated in larynx carcinoma)   | uncharacterized tissue        |
| Homo sapiens library (Heus HC)          | uncharacterized tissue        |
| NIH_MGC_78                              | pancreas                      |
| NIH_MGC_83                              | prostate                      |
| NIH_MGC_18                              | lung                          |
| NCI_CGAP_Co26                           | colon                         |
| NCI_CGAP_Co27                           | colon                         |
| NCI_CGAP_Co28                           | colon                         |
| NCI_CGAP_Co29                           | colon                         |
| NIH_MGC_46                              | uterus                        |
| NIH_MGC_48                              | uncharacterized tissue        |
| NIH_MGC_75                              | kidney                        |
| NIH_MGC_77                              | lung                          |
| NIH_MGC_79                              | placenta                      |
| BT0616                                  | mammary gland                 |
| BT0685                                  | mammary gland                 |
| BT0736                                  | mammary gland                 |
| BT0760                                  | mammary gland                 |
| BT0767                                  | mammary gland                 |
| BT0770                                  | mammary gland                 |
| BT0777                                  | mammary gland                 |
| BT0786                                  | mammary gland                 |
| BT0789                                  | mammary gland                 |
| BT0792                                  | mammary gland                 |
| BT0793                                  | mammary gland                 |
| BT0794                                  | mammary gland                 |
| BT0795                                  | mammary gland                 |
| BT0796                                  | mammary gland                 |
| BT0800                                  | mammary gland                 |
| CT0217                                  | colon                         |
| CT0388                                  | colon                         |
| CT0389                                  | colon                         |
| CT0390                                  | colon                         |

| cDNA Library | Designated Tissue for Library |
|--------------|-------------------------------|
| CT0392       | colon                         |
| CT0393       | colon                         |
| CT0394       | colon                         |
| CT0397       | colon                         |
| CT0398       | colon                         |
| CT0400       | colon                         |
| CT0401       | colon                         |
| CT0402       | colon                         |
| CT0403       | colon                         |
| CT0404       | colon                         |
| CT0405       | colon                         |
| CT0406       | colon                         |
| CT0407       | colon                         |
| CT0408       | colon                         |
| CT0409       | colon                         |
| CT0411       | colon                         |
| CT0412       | colon                         |
| CT0413       | colon                         |
| CT0414       | colon                         |
| CT0415       | colon                         |
| CT0416       | colon                         |
| CT0417       | colon                         |
| CT0425       | colon                         |
| CT0427       | colon                         |
| CT0428       | colon                         |
| CT0429       | colon                         |
| CT0432       | colon                         |
| CT0434       | colon                         |
| CT0470       | colon                         |
| CT0471       | colon                         |
| CT0472       | colon                         |
| CT0473       | colon                         |
| CT0474       | colon                         |
| CT0477       | colon                         |
| CT0483       | colon                         |
| CT0484       | colon                         |
| CT0491       | colon                         |
| CT0492       | colon                         |
| CT0499       | colon                         |
| CT0502       | colon                         |

| cDNA Library | Designated Tissue for Library |
|--------------|-------------------------------|
| HT0020       | head and neck                 |
| HT0084       | head and neck                 |
| HT0445       | thyroid                       |
| HT0496       | thyroid                       |
| HT0497       | thyroid                       |
| HT0542       | thyroid                       |
| HT0571       | thyroid                       |
| HT0576       | thyroid                       |
| HT0594       | thyroid                       |
| HT0619       | thyroid                       |
| HT0636       | head and neck                 |
| HT0637       | head and neck                 |
| HT0640       | head and neck                 |
| HT0678       | head and neck                 |
| HT0679       | head and neck                 |
| HT0696       | head and neck                 |
| HT0697       | head and neck                 |
| HT0698       | head and neck                 |
| HT0699       | head and neck                 |
| HT0702       | head and neck                 |
| HT0704       | head and neck                 |
| HT0705       | head and neck                 |
| HT0706       | head and neck                 |
| HT0710       | head and neck                 |
| HT0711       | head and neck                 |
| HT0712       | head and neck                 |
| HT0713       | head and neck                 |
| HT0714       | head and neck                 |
| HT0718       | head and neck                 |
| HT0719       | head and neck                 |
| HT0720       | head and neck                 |
| HT0721       | head and neck                 |
| HT0722       | head and neck                 |
| HT0723       | head and neck                 |
| HT0724       | head and neck                 |
| HT0725       | head and neck                 |
| HT0726       | head and neck                 |
| HT0727       | head and neck                 |
| HT0728       | head and neck                 |
| HT0734       | head and neck                 |

| cDNA Library | Designated Tissue for Library |
|--------------|-------------------------------|
| HT0735       | head and neck                 |
| HT0736       | head and neck                 |
| HT0737       | head and neck                 |
| HT0740       | head and neck                 |
| HT0742       | head and neck                 |
| HT0743       | head and neck                 |
| HT0744       | head and neck                 |
| HT0745       | head and neck                 |
| HT0746       | head and neck                 |
| HT0747       | head and neck                 |
| HT0750       | head and neck                 |
| HT0751       | head and neck                 |
| HT0752       | head and neck                 |
| HT0756       | head and neck                 |
| HT0757       | head and neck                 |
| HT0758       | head and neck                 |
| HT0759       | head and neck                 |
| HT0760       | head and neck                 |
| HT0761       | head and neck                 |
| HT0762       | head and neck                 |
| HT0764       | head and neck                 |
| HT0765       | head and neck                 |
| HT0766       | head and neck                 |
| HT0767       | head and neck                 |
| HT0769       | head and neck                 |
| HT0771       | head and neck                 |
| HT0773       | head and neck                 |
| HT0776       | head and neck                 |
| HT0778       | head and neck                 |
| HT0779       | head and neck                 |
| HT0781       | head and neck                 |
| HT0782       | head and neck                 |
| HT0783       | head and neck                 |
| HT0785       | head and neck                 |
| HT0787       | head and neck                 |
| HT0788       | head and neck                 |
| HT0790       | head and neck                 |
| HT0791       | head and neck                 |
| HT0792       | head and neck                 |
| HT0793       | head and neck                 |

| cDNA Library | Designated Tissue for Library |
|--------------|-------------------------------|
| HT0795       | head and neck                 |
| HT0796       | head and neck                 |
| HT0797       | head and neck                 |
| HT0798       | head and neck                 |
| HT0799       | head and neck                 |
| HT0800       | head and neck                 |
| HT0801       | head and neck                 |
| HT0802       | head and neck                 |
| HT0804       | head and neck                 |
| HT0805       | head and neck                 |
| HT0806       | head and neck                 |
| HT0807       | head and neck                 |
| HT0808       | head and neck                 |
| HT0809       | head and neck                 |
| HT0810       | head and neck                 |
| HT0815       | head and neck                 |
| HT0819       | head and neck                 |
| HT0821       | head and neck                 |
| HT0822       | head and neck                 |
| HT0824       | head and neck                 |
| HT0825       | head and neck                 |
| HT0826       | head and neck                 |
| HT0827       | head and neck                 |
| HT0828       | head and neck                 |
| HT0830       | head and neck                 |
| HT0837       | head and neck                 |
| HT0838       | head and neck                 |
| HT0839       | head and neck                 |
| HT0840       | head and neck                 |
| HT0841       | head and neck                 |
| HT0843       | head and neck                 |
| HT0845       | head and neck                 |
| HT0846       | head and neck                 |
| HT0847       | head and neck                 |
| HT0850       | head and neck                 |
| HT0851       | head and neck                 |
| HT0852       | head and neck                 |
| HT0854       | head and neck                 |
| HT0855       | head and neck                 |
| HT0857       | head and neck                 |

| cDNA Library | Designated Tissue for Library |
|--------------|-------------------------------|
| HT0858       | head and neck                 |
| HT0859       | head and neck                 |
| HT0861       | head and neck                 |
| HT0862       | head and neck                 |
| HT0864       | head and neck                 |
| HT0865       | head and neck                 |
| HT0868       | head and neck                 |
| HT0869       | head and neck                 |
| HT0871       | head and neck                 |
| HT0872       | head and neck                 |
| HT0875       | head and neck                 |
| HT0876       | head and neck                 |
| HT0877       | head and neck                 |
| HT0878       | head and neck                 |
| HT0880       | head and neck                 |
| HT0881       | head and neck                 |
| HT0882       | head and neck                 |
| HT0883       | head and neck                 |
| HT0885       | head and neck                 |
| HT0886       | head and neck                 |
| HT0887       | head and neck                 |
| HT0893       | head and neck                 |
| HT0894       | head and neck                 |
| HT0895       | head and neck                 |
| HT0905       | head and neck                 |
| HT0934       | head and neck                 |
| NN0098       | cerebrum                      |
| NN0099       | cerebrum                      |
| NN0101       | cerebrum                      |
| NN0104       | cerebrum                      |
| NN0107       | cerebrum                      |
| NN0110       | cerebrum                      |
| NN0116       | cerebrum                      |
| NN0117       | cerebrum                      |
| NN0118       | cerebrum                      |
| NN0119       | cerebrum                      |
| NN0120       | cerebrum                      |
| NN0127       | cerebrum                      |
| NN0128       | cerebrum                      |
| NN0129       | cerebrum                      |

| cDNA Library | Designated Tissue for Library |
|--------------|-------------------------------|
| NN0130       | cerebrum                      |
| NN0133       | cerebrum                      |
| NN0134       | cerebrum                      |
| NN0135       | cerebrum                      |
| NN0136       | cerebrum                      |
| NN0141       | cerebrum                      |
| NN0142       | cerebrum                      |
| NN0143       | cerebrum                      |
| NN0144       | cerebrum                      |
| NN0145       | cerebrum                      |
| NN0146       | cerebrum                      |
| NN0157       | cerebrum                      |
| NN0165       | cerebrum                      |
| NN0166       | cerebrum                      |
| NN0168       | cerebrum                      |
| NN0169       | cerebrum                      |
| NN0170       | cerebrum                      |
| NN0171       | cerebrum                      |
| NN0172       | cerebrum                      |
| NN0174       | cerebrum                      |
| NN0177       | cerebrum                      |
| NN0178       | cerebrum                      |
| NN0179       | cerebrum                      |
| NN0182       | cerebrum                      |
| NN0183       | cerebrum                      |
| NN0184       | cerebrum                      |
| NN0198       | cerebrum                      |
| NN1035       | cerebrum                      |
| NN1045       | cerebrum                      |
| NN1068       | cerebrum                      |
| NN1075       | cerebrum                      |
| NN1076       | cerebrum                      |
| NN1077       | cerebrum                      |
| NN1078       | cerebrum                      |
| NN1101       | cerebrum                      |
| NN1104       | cerebrum                      |
| NN1105       | cerebrum                      |
| NN1111       | cerebrum                      |
| NN1112       | cerebrum                      |
| NN1120       | cerebrum                      |

| cDNA Library         | Designated Tissue for Library |
|----------------------|-------------------------------|
| NN1121               | cerebrum                      |
| NN1122               | cerebrum                      |
| NN1123               | cerebrum                      |
| NN1124               | cerebrum                      |
| NN1125               | cerebrum                      |
| NN1126               | cerebrum                      |
| UT0001               | uterus                        |
| UT0003               | uterus                        |
| UT0005               | uterus                        |
| UT0008               | uterus                        |
| UT0012               | uterus                        |
| UT0021               | uterus                        |
| UT0022               | uterus                        |
| UT0023               | uterus                        |
| UT0027               | uterus                        |
| UT0028               | uterus                        |
| UT0029               | uterus                        |
| UT0031               | uterus                        |
| UT0033               | uterus                        |
| UT0034               | uterus                        |
| UT0038               | uterus                        |
| UT0039               | uterus                        |
| UT0041               | uterus                        |
| SAGE_PrCA-1          | prostate                      |
| SAGE_normal_prostate | prostate                      |
| DT0058               | uncharacterized tissue        |
| NT0001               | brain                         |
| NT0008               | brain                         |
| NT0018               | brain                         |
| NT0022               | brain                         |
| NT0023               | brain                         |
| NT0024               | brain                         |
| NT0025               | brain                         |
| NT0042               | brain                         |
| NT0043               | brain                         |
| NT0046               | brain                         |
| NT0048               | brain                         |
| NT0050               | brain                         |
| NT0071               | brain                         |
| NT0074               | brain                         |

| cDNA Library | Designated Tissue for Library |
|--------------|-------------------------------|
| NT0086       | brain                         |
| NT0087       | brain                         |
| NT0092       | brain                         |
| NT0098       | brain                         |
| NT0099       | brain                         |
| NT0100       | brain                         |
| NT0101       | brain                         |
| NT0102       | brain                         |
| NT0103       | brain                         |
| NT0104       | brain                         |
| NT0105       | brain                         |
| NT0109       | brain                         |
| NT0110       | brain                         |
| NT0112       | brain                         |
| NT0113       | brain                         |
| NT0115       | brain                         |
| NT0116       | brain                         |
| NT0117       | brain                         |
| NT0121       | brain                         |
| NT0122       | brain                         |
| NT0123       | brain                         |
| NT0124       | brain                         |
| NT0125       | brain                         |
| NT0126       | brain                         |
| NT0128       | brain                         |
| NT0129       | brain                         |
| NT0837       | brain                         |
| GN0013       | placenta                      |
| GN0021       | placenta                      |
| GN0023       | placenta                      |
| GN0036       | placenta                      |
| GN0037       | placenta                      |
| GN0042       | placenta                      |
| GN0045       | placenta                      |
| GN0046       | placenta                      |
| GN0047       | placenta                      |
| GN0049       | placenta                      |
| GN0050       | placenta                      |
| GN0052       | placenta                      |
| GN0061       | placenta                      |

| cDNA Library | Designated Tissue for Library |
|--------------|-------------------------------|
| GN0063       | placenta                      |
| GN0065       | placenta                      |
| FT0010       | prostate                      |
| FT0014       | prostate                      |
| FT0015       | prostate                      |
| FT0018       | prostate                      |
| FT0019       | prostate                      |
| FT0020       | prostate                      |
| FT0021       | prostate                      |
| FT0022       | prostate                      |
| FT0023       | prostate                      |
| FT0024       | prostate                      |
| FT0025       | prostate                      |
| FT0027       | prostate                      |
| FT0028       | prostate                      |
| CT0331       | colon                         |
| CT0334       | colon                         |
| CT0336       | colon                         |
| CT0337       | colon                         |
| CT0338       | colon                         |
| CT0339       | colon                         |
| CT0341       | colon                         |
| CT0342       | colon                         |
| CT0343       | colon                         |
| CT0345       | colon                         |
| CT0347       | colon                         |
| CT0348       | colon                         |
| CT0349       | colon                         |
| CT0357       | colon                         |
| CT0358       | colon                         |
| CT0360       | colon                         |
| CT0361       | colon                         |
| CT0363       | colon                         |
| CT0369       | colon                         |
| CT0373       | colon                         |
| CT0376       | colon                         |
| CT0378       | colon                         |
| CT0379       | colon                         |
| CT0380       | colon                         |
| CT0396       | colon                         |

| cDNA Library | Designated Tissue for Library |
|--------------|-------------------------------|
| DT0001       | uncharacterized tissue        |
| DT0002       | uncharacterized tissue        |
| DT0003       | uncharacterized tissue        |
| DT0005       | uncharacterized tissue        |
| DT0006       | uncharacterized tissue        |
| DT0007       | uncharacterized tissue        |
| DT0008       | uncharacterized tissue        |
| DT0012       | uncharacterized tissue        |
| DT0017       | uncharacterized tissue        |
| DT0018       | uncharacterized tissue        |
| DT0019       | uncharacterized tissue        |
| DT0021       | uncharacterized tissue        |
| DT0025       | uncharacterized tissue        |
| DT0028       | uncharacterized tissue        |
| DT0029       | uncharacterized tissue        |
| DT0032       | uncharacterized tissue        |
| DT0035       | uncharacterized tissue        |
| DT0036       | uncharacterized tissue        |
| DT0037       | uncharacterized tissue        |
| DT0040       | uncharacterized tissue        |
| DT0041       | uncharacterized tissue        |
| DT0043       | uncharacterized tissue        |
| DT0044       | uncharacterized tissue        |
| DT0045       | uncharacterized tissue        |
| DT0049       | uncharacterized tissue        |
| DT0050       | uncharacterized tissue        |
| DT0051       | uncharacterized tissue        |
| DT0052       | uncharacterized tissue        |
| DT0053       | uncharacterized tissue        |
| DT0054       | uncharacterized tissue        |
| DT0056       | uncharacterized tissue        |
| DT0057       | uncharacterized tissue        |
| DT0064       | uncharacterized tissue        |
| DT0076       | uncharacterized tissue        |
| HT0063       | head and neck                 |
| HT0064       | head and neck                 |
| HT0068       | head and neck                 |
| HT0069       | head and neck                 |
| HT0071       | head and neck                 |
| HT0072       | head and neck                 |

| cDNA Library | Designated Tissue for Library |
|--------------|-------------------------------|
| HT0075       | head and neck                 |
| HT0076       | head and neck                 |
| HT0077       | head and neck                 |
| HT0078       | head and neck                 |
| HT0079       | head and neck                 |
| HT0080       | head and neck                 |
| HT0081       | head and neck                 |
| HT0083       | head and neck                 |
| HT0085       | head and neck                 |
| HT0087       | head and neck                 |
| HT0089       | head and neck                 |
| HT0092       | head and neck                 |
| HT0099       | head and neck                 |
| HT0101       | head and neck                 |
| HT0103       | head and neck                 |
| HT0119       | head and neck                 |
| HT0120       | head and neck                 |
| HT0121       | head and neck                 |
| HT0122       | head and neck                 |
| HT0127       | head and neck                 |
| HT0129       | head and neck                 |
| HT0132       | head and neck                 |
| HT0135       | head and neck                 |
| HT0142       | head and neck                 |
| HT0143       | head and neck                 |
| HT0144       | head and neck                 |
| HT0146       | head and neck                 |
| HT0147       | head and neck                 |
| HT0148       | head and neck                 |
| HT0149       | head and neck                 |
| HT0150       | head and neck                 |
| HT0152       | head and neck                 |
| HT0153       | head and neck                 |
| HT0154       | head and neck                 |
| HT0155       | head and neck                 |
| HT0156       | head and neck                 |
| HT0157       | head and neck                 |
| HT0158       | head and neck                 |
| HT0159       | head and neck                 |
| HT0160       | head and neck                 |

| cDNA Library | Designated Tissue for Library |
|--------------|-------------------------------|
| HT0161       | head and neck                 |
| HT0162       | head and neck                 |
| HT0164       | head and neck                 |
| HT0165       | head and neck                 |
| HT0166       | head and neck                 |
| HT0167       | head and neck                 |
| HT0168       | head and neck                 |
| HT0169       | head and neck                 |
| HT0170       | head and neck                 |
| HT0171       | head and neck                 |
| HT0174       | head and neck                 |
| HT0175       | head and neck                 |
| HT0176       | head and neck                 |
| HT0177       | head and neck                 |
| HT0178       | head and neck                 |
| HT0179       | head and neck                 |
| HT0180       | head and neck                 |
| HT0181       | head and neck                 |
| HT0182       | head and neck                 |
| HT0183       | head and neck                 |
| HT0184       | head and neck                 |
| HT0185       | head and neck                 |
| HT0186       | head and neck                 |
| HT0187       | head and neck                 |
| HT0189       | head and neck                 |
| HT0190       | head and neck                 |
| HT0191       | head and neck                 |
| HT0192       | head and neck                 |
| HT0193       | head and neck                 |
| HT0194       | head and neck                 |
| HT0195       | head and neck                 |
| HT0197       | head and neck                 |
| HT0198       | head and neck                 |
| HT0199       | head and neck                 |
| HT0200       | head and neck                 |
| HT0201       | head and neck                 |
| HT0203       | head and neck                 |
| HT0204       | head and neck                 |
| HT0205       | head and neck                 |
| HT0206       | head and neck                 |

| cDNA Library | Designated Tissue for Library |
|--------------|-------------------------------|
| HT0207       | head and neck                 |
| HT0208       | head and neck                 |
| HT0209       | head and neck                 |
| HT0214       | head and neck                 |
| HT0215       | head and neck                 |
| HT0216       | head and neck                 |
| HT0217       | head and neck                 |
| HT0218       | head and neck                 |
| HT0219       | head and neck                 |
| HT0220       | head and neck                 |
| HT0221       | head and neck                 |
| HT0222       | head and neck                 |
| HT0223       | head and neck                 |
| HT0224       | head and neck                 |
| HT0225       | head and neck                 |
| HT0226       | head and neck                 |
| HT0227       | head and neck                 |
| HT0228       | head and neck                 |
| HT0229       | head and neck                 |
| HT0230       | head and neck                 |
| HT0231       | head and neck                 |
| HT0232       | head and neck                 |
| HT0233       | head and neck                 |
| HT0240       | head and neck                 |
| HT0241       | head and neck                 |
| HT0242       | head and neck                 |
| HT0243       | head and neck                 |
| HT0244       | head and neck                 |
| HT0245       | head and neck                 |
| HT0247       | head and neck                 |
| HT0248       | head and neck                 |
| HT0249       | head and neck                 |
| HT0250       | head and neck                 |
| HT0251       | head and neck                 |
| HT0252       | head and neck                 |
| HT0253       | head and neck                 |
| HT0254       | head and neck                 |
| HT0255       | head and neck                 |
| HT0256       | head and neck                 |
| HT0257       | head and neck                 |

| cDNA Library | Designated Tissue for Library |
|--------------|-------------------------------|
| HT0258       | head and neck                 |
| HT0259       | head and neck                 |
| HT0260       | head and neck                 |
| HT0261       | head and neck                 |
| HT0262       | head and neck                 |
| HT0263       | head and neck                 |
| HT0264       | head and neck                 |
| HT0266       | head and neck                 |
| HT0267       | head and neck                 |
| HT0268       | head and neck                 |
| HT0269       | head and neck                 |
| HT0270       | head and neck                 |
| HT0272       | head and neck                 |
| HT0273       | head and neck                 |
| HT0274       | head and neck                 |
| HT0275       | head and neck                 |
| HT0276       | head and neck                 |
| HT0277       | head and neck                 |
| HT0278       | head and neck                 |
| HT0280       | head and neck                 |
| HT0281       | head and neck                 |
| HT0282       | head and neck                 |
| HT0283       | head and neck                 |
| HT0285       | head and neck                 |
| HT0286       | head and neck                 |
| HT0287       | head and neck                 |
| HT0289       | head and neck                 |
| HT0290       | head and neck                 |
| HT0292       | head and neck                 |
| HT0293       | head and neck                 |
| HT0295       | head and neck                 |
| HT0296       | head and neck                 |
| HT0297       | head and neck                 |
| HT0298       | head and neck                 |
| HT0299       | head and neck                 |
| HT0300       | head and neck                 |
| HT0301       | head and neck                 |
| HT0302       | head and neck                 |
| HT0303       | head and neck                 |
| HT0304       | head and neck                 |

| cDNA Library | Designated Tissue for Library |
|--------------|-------------------------------|
| HT0305       | head and neck                 |
| HT0309       | head and neck                 |
| HT0310       | head and neck                 |
| HT0311       | head and neck                 |
| HT0312       | head and neck                 |
| HT0313       | head and neck                 |
| HT0314       | head and neck                 |
| HT0315       | head and neck                 |
| HT0316       | head and neck                 |
| HT0321       | head and neck                 |
| HT0322       | head and neck                 |
| HT0323       | head and neck                 |
| HT0324       | head and neck                 |
| HT0325       | head and neck                 |
| HT0326       | head and neck                 |
| HT0327       | head and neck                 |
| HT0328       | head and neck                 |
| HT0329       | head and neck                 |
| HT0330       | head and neck                 |
| HT0331       | head and neck                 |
| HT0333       | head and neck                 |
| HT0334       | head and neck                 |
| HT0335       | head and neck                 |
| HT0336       | head and neck                 |
| HT0337       | head and neck                 |
| HT0338       | head and neck                 |
| HT0339       | head and neck                 |
| HT0340       | head and neck                 |
| HT0342       | head and neck                 |
| HT0343       | head and neck                 |
| HT0344       | head and neck                 |
| HT0345       | head and neck                 |
| HT0346       | head and neck                 |
| HT0347       | head and neck                 |
| HT0348       | head and neck                 |
| HT0349       | head and neck                 |
| HT0350       | head and neck                 |
| HT0351       | head and neck                 |
| HT0352       | head and neck                 |
| HT0353       | head and neck                 |

| cDNA Library | Designated Tissue for Library |
|--------------|-------------------------------|
| HT0354       | head and neck                 |
| HT0363       | head and neck                 |
| HT0364       | head and neck                 |
| HT0366       | head and neck                 |
| HT0367       | head and neck                 |
| HT0369       | head and neck                 |
| HT0370       | head and neck                 |
| HT0371       | head and neck                 |
| HT0372       | head and neck                 |
| HT0373       | head and neck                 |
| HT0374       | head and neck                 |
| HT0375       | head and neck                 |
| HT0376       | head and neck                 |
| HT0383       | head and neck                 |
| HT0384       | head and neck                 |
| HT0386       | head and neck                 |
| HT0390       | head and neck                 |
| HT0391       | head and neck                 |
| HT0392       | head and neck                 |
| HT0393       | head and neck                 |
| HT0394       | head and neck                 |
| HT0395       | head and neck                 |
| HT0396       | head and neck                 |
| HT0397       | head and neck                 |
| HT0400       | head and neck                 |
| HT0401       | thyroid                       |
| HT0409       | thyroid                       |
| HT0410       | thyroid                       |
| HT0411       | thyroid                       |
| HT0417       | thyroid                       |
| HT0418       | thyroid                       |
| HT0419       | thyroid                       |
| HT0422       | thyroid                       |
| HT0425       | thyroid                       |
| HT0427       | thyroid                       |
| HT0439       | thyroid                       |
| HT0441       | thyroid                       |
| HT0442       | thyroid                       |
| HT0444       | thyroid                       |
| HT0449       | thyroid                       |

| cDNA Library | Designated Tissue for Library |
|--------------|-------------------------------|
| HT0450       | thyroid                       |
| HT0451       | thyroid                       |
| HT0452       | thyroid                       |
| HT0454       | thyroid                       |
| HT0456       | thyroid                       |
| LT0001       | muscle                        |
| LT0002       | muscle                        |
| LT0003       | muscle                        |
| LT0007       | muscle                        |
| LT0008       | muscle                        |
| LT0009       | muscle                        |
| LT0011       | muscle                        |
| LT0016       | muscle                        |
| LT0017       | muscle                        |
| LT0018       | muscle                        |
| LT0021       | muscle                        |
| LT0022       | muscle                        |
| LT0023       | muscle                        |
| LT0025       | muscle                        |
| LT0027       | muscle                        |
| LT0030       | muscle                        |
| LT0031       | muscle                        |
| LT0032       | muscle                        |
| LT0042       | muscle                        |
| LT0045       | muscle                        |
| LT0057       | muscle                        |
| LT0058       | muscle                        |
| LT0069       | muscle                        |
| LT0074       | muscle                        |
| LT0075       | muscle                        |
| PT0001       | uncharacterized tissue        |
| PT0002       | uncharacterized tissue        |
| PT0003       | uncharacterized tissue        |
| PT0004       | uncharacterized tissue        |
| PT0005       | uncharacterized tissue        |
| PT0006       | uncharacterized tissue        |
| PT0007       | uncharacterized tissue        |
| PT0013       | uncharacterized tissue        |
| PT0014       | uncharacterized tissue        |
| PT0015       | uncharacterized tissue        |

| cDNA Library | Designated Tissue for Library |
|--------------|-------------------------------|
| PT0016       | uncharacterized tissue        |
| PT0019       | uncharacterized tissue        |
| PT0023       | uncharacterized tissue        |
| PT0025       | uncharacterized tissue        |
| PT0026       | uncharacterized tissue        |
| PT0027       | uncharacterized tissue        |
| PT0028       | uncharacterized tissue        |
| PT0030       | uncharacterized tissue        |
| PT0031       | uncharacterized tissue        |
| PT0047       | uncharacterized tissue        |
| PT0048       | uncharacterized tissue        |
| PT0049       | uncharacterized tissue        |
| PT0050       | uncharacterized tissue        |
| ST0016       | stomach                       |
| ST0063       | stomach                       |
| ST0088       | stomach                       |
| ST0089       | stomach                       |
| ST0090       | stomach                       |
| ST0091       | stomach                       |
| ST0096       | stomach                       |
| ST0098       | stomach                       |
| ST0110       | stomach                       |
| ST0111       | stomach                       |
| ST0112       | stomach                       |
| ST0113       | stomach                       |
| ST0116       | stomach                       |
| ST0117       | stomach                       |
| ST0118       | stomach                       |
| ST0119       | stomach                       |
| ST0121       | stomach                       |
| ST0122       | stomach                       |
| ST0124       | stomach                       |
| ST0125       | stomach                       |
| ST0129       | stomach                       |
| ST0130       | stomach                       |
| ST0131       | stomach                       |
| ST0132       | stomach                       |
| ST0133       | stomach                       |
| ST0134       | stomach                       |
| ST0136       | stomach                       |

| cDNA Library | Designated Tissue for Library |
|--------------|-------------------------------|
| ST0137       | stomach                       |
| ST0138       | stomach                       |
| ST0139       | stomach                       |
| ST0142       | stomach                       |
| ST0144       | stomach                       |
| ST0145       | stomach                       |
| ST0150       | stomach                       |
| ST0152       | stomach                       |
| ST0156       | stomach                       |
| ST0157       | stomach                       |
| ST0158       | stomach                       |
| ST0159       | stomach                       |
| ST0160       | stomach                       |
| ST0162       | stomach                       |
| ST0163       | stomach                       |
| ST0164       | stomach                       |
| ST0165       | stomach                       |
| ST0166       | stomach                       |
| ST0168       | stomach                       |
| ST0169       | stomach                       |
| ST0170       | stomach                       |
| ST0171       | stomach                       |
| ST0172       | stomach                       |
| ST0173       | stomach                       |
| ST0174       | stomach                       |
| ST0175       | stomach                       |
| ST0176       | stomach                       |
| ST0177       | stomach                       |
| ST0178       | stomach                       |
| ST0179       | stomach                       |
| ST0180       | stomach                       |
| ST0181       | stomach                       |
| ST0182       | stomach                       |
| ST0183       | stomach                       |
| ST0184       | stomach                       |
| ST0185       | stomach                       |
| ST0186       | stomach                       |
| ST0188       | stomach                       |
| ST0189       | stomach                       |
| ST0190       | stomach                       |

| cDNA Library | Designated Tissue for Library |
|--------------|-------------------------------|
| ST0191       | stomach                       |
| ST0192       | stomach                       |
| ST0194       | stomach                       |
| ST0196       | stomach                       |
| ST0197       | stomach                       |
| ST0198       | stomach                       |
| ST0199       | stomach                       |
| ST0200       | stomach                       |
| ST0201       | stomach                       |
| ST0203       | stomach                       |
| ST0204       | stomach                       |
| ST0208       | stomach                       |
| ST0209       | stomach                       |
| ST0212       | stomach                       |
| ST0213       | stomach                       |
| ST0214       | stomach                       |
| ST0215       | stomach                       |
| ST0216       | stomach                       |
| ST0218       | stomach                       |
| ST0220       | stomach                       |
| ST0222       | stomach                       |
| ST0224       | stomach                       |
| ST0225       | stomach                       |
| ST0227       | stomach                       |
| ST0228       | stomach                       |
| ST0230       | stomach                       |
| ST0231       | stomach                       |
| ST0232       | stomach                       |
| ST0233       | stomach                       |
| ST0234       | stomach                       |
| ST0235       | stomach                       |
| ST0236       | stomach                       |
| ST0240       | stomach                       |
| ST0241       | stomach                       |
| ST0242       | stomach                       |
| ST0244       | stomach                       |
| ST0246       | stomach                       |
| ST0256       | stomach                       |
| ST0258       | stomach                       |
| ST0259       | stomach                       |

| cDNA Library | Designated Tissue for Library |
|--------------|-------------------------------|
| ST0260       | stomach                       |
| ST0261       | stomach                       |
| ST0262       | stomach                       |
| ST0263       | stomach                       |
| ST0264       | stomach                       |
| ST0265       | stomach                       |
| ST0266       | stomach                       |
| ST0268       | stomach                       |
| ST0272       | stomach                       |
| ST0273       | stomach                       |
| ST0274       | stomach                       |
| ST0275       | stomach                       |
| ST0276       | stomach                       |
| ST0277       | stomach                       |
| ST0279       | stomach                       |
| ST0280       | stomach                       |
| ST0281       | stomach                       |
| ST0282       | stomach                       |
| ST0283       | stomach                       |
| ST0284       | stomach                       |
| ST0285       | stomach                       |
| ST0286       | stomach                       |
| ST0287       | stomach                       |
| ST0288       | stomach                       |
| ST0292       | stomach                       |
| ST0293       | stomach                       |
| ST0297       | stomach                       |
| ST0299       | stomach                       |
| ST0300       | stomach                       |
| ST0301       | stomach                       |
| ST0302       | stomach                       |
| ST0303       | stomach                       |
| ST0307       | stomach                       |
| ST0308       | stomach                       |
| ST0311       | stomach                       |
| ST0314       | stomach                       |
| ST0315       | stomach                       |
| ST0317       | stomach                       |
| TT0002       | testis                        |
| TT0003       | testis                        |

| cDNA Library                                                        | Designated Tissue for Library |
|---------------------------------------------------------------------|-------------------------------|
| TT0004                                                              | testis                        |
| TT0005                                                              | testis                        |
| TT0006                                                              | testis                        |
| TT0007                                                              | testis                        |
| TT0008                                                              | testis                        |
| TT0009                                                              | testis                        |
| TT0010                                                              | testis                        |
| TT0011                                                              | testis                        |
| TT0012                                                              | testis                        |
| TT0013                                                              | testis                        |
| TT0014                                                              | testis                        |
| SAGE_293-CTRL                                                       | kidney                        |
| Human malignant glioma cell cDNA fragment                           | uncharacterized tissue        |
| Fetal brain library                                                 | brain                         |
| Salivary Gland Library                                              | uncharacterized tissue        |
| FLE                                                                 | uncharacterized tissue        |
| Homo sapiens HaCaT-keratinocytes                                    | uncharacterized tissue        |
| Homo sapiens ATCC HTB-12; SW1088                                    | uncharacterized tissue        |
| Homo sapiens PC-3 prostate tumor                                    | uncharacterized tissue        |
| Neuronal Differentiation of the NT2/D1 cell line.                   | uncharacterized tissue        |
| fetal human kidney lambda Triplex library                           | uncharacterized tissue        |
| NCI_CGAP_HN17                                                       | head and neck                 |
| NCI_CGAP_HN19                                                       | head and neck                 |
| Homo sapiens PC-3M subline IE8                                      | uncharacterized tissue        |
| Human Fetal Brain cDNA in Uni-ZAP XR Vector                         | uncharacterized tissue        |
| brain III, cerebral cortex                                          | uncharacterized tissue        |
| brain I, Batten's subtracted                                        | uncharacterized tissue        |
| Homo sapiens HTLV-1 positive adult T-cell leukemia cell line JuanaW | uncharacterized tissue        |
| Human (activated) smooth muscle cells, DD/RT-PCR products           | uncharacterized tissue        |
| SAGE_Chen_LNCaP                                                     | prostate                      |
| SAGE_Chen_LNCaP_no-DHT                                              | prostate                      |
| SAGE_Chen_Normal_Pr                                                 | prostate                      |
| SAGE_Chen_Tumor_Pr                                                  | prostate                      |
| Human leukocyte MATCHMAKER cDNA Library                             | uncharacterized tissue        |
| Human Fetal Brain MATCHMAKER cDNA Library                           | uncharacterized tissue        |
| Human umbilical vein Endothelial Cell cDNA library                  | uncharacterized tissue        |
| BN0011                                                              | mammary gland                 |
| BT0054                                                              | mammary gland                 |
| BT0272                                                              | mammary gland                 |
| BT0343                                                              | mammary gland                 |

| cDNA Library | Designated Tissue for Library |
|--------------|-------------------------------|
| BT0353       | mammary gland                 |
| BT0354       | mammary gland                 |
| BT0355       | mammary gland                 |
| BT0356       | mammary gland                 |
| BT0373       | mammary gland                 |
| BT0384       | mammary gland                 |
| BT0392       | mammary gland                 |
| BT0501       | mammary gland                 |
| BT0526       | mammary gland                 |
| BT0527       | mammary gland                 |
| BT0528       | mammary gland                 |
| BT0557       | mammary gland                 |
| BT0559       | mammary gland                 |
| BT0561       | mammary gland                 |
| BT0562       | mammary gland                 |
| BT0563       | mammary gland                 |
| BT0592       | mammary gland                 |
| BT0593       | mammary gland                 |
| BT0596       | mammary gland                 |
| BT0597       | mammary gland                 |
| CN0003       | colon                         |
| CN0004       | colon                         |
| CN0005       | colon                         |
| CN0006       | colon                         |
| CN0008       | colon                         |
| CN0010       | colon                         |
| CN0011       | colon                         |
| CN0013       | colon                         |
| CN0017       | colon                         |
| CN0018       | colon                         |
| CN0019       | colon                         |
| CN0031       | colon                         |
| CN0039       | colon                         |
| CN0040       | colon                         |
| CN0043       | colon                         |
| CN0044       | colon                         |
| CN0045       | colon                         |
| CT0258       | colon                         |
| CT0333       | colon                         |
| CT0370       | colon                         |

| cDNA Library                      | Designated Tissue for Library |
|-----------------------------------|-------------------------------|
| CT0381                            | colon                         |
| CT0382                            | colon                         |
| DT0042                            | uncharacterized tissue        |
| DT0061                            | uncharacterized tissue        |
| DT0062                            | uncharacterized tissue        |
| DT0065                            | uncharacterized tissue        |
| DT0067                            | uncharacterized tissue        |
| DT0075                            | uncharacterized tissue        |
| HT0368                            | head and neck                 |
| HT0377                            | head and neck                 |
| HT0407                            | thyroid                       |
| HT0435                            | thyroid                       |
| HT0453                            | thyroid                       |
| HT0470                            | thyroid                       |
| HT0482                            | thyroid                       |
| HT0484                            | thyroid                       |
| LT0004                            | muscle                        |
| LT0056                            | muscle                        |
| LT0059                            | muscle                        |
| LT0061                            | muscle                        |
| LT0063                            | muscle                        |
| LT0065                            | muscle                        |
| LT0066                            | muscle                        |
| LT0067                            | muscle                        |
| LT0070                            | muscle                        |
| LT0094                            | muscle                        |
| PT0009                            | uncharacterized tissue        |
| PT0033                            | uncharacterized tissue        |
| PT0043                            | uncharacterized tissue        |
| PT0046                            | uncharacterized tissue        |
| ST0205                            | stomach                       |
| ST0247                            | stomach                       |
| ST0278                            | stomach                       |
| ST0290                            | stomach                       |
| Human Pancreatic Islets           | pancreatic islet              |
| Homo sapiens MG63                 | uncharacterized tissue        |
| Homo sapiens U937                 | uncharacterized tissue        |
| pGEM-T library                    | uncharacterized tissue        |
| Human pancreas expression library | uncharacterized tissue        |
| Human cDNA Lung Library           | uncharacterized tissue        |

| cDNA Library | Designated Tissue for Library |
|--------------|-------------------------------|
| BN0008       | mammary gland                 |
| BN0025       | mammary gland                 |
| BN0026       | mammary gland                 |
| BT0007       | mammary gland                 |
| BT0357       | mammary gland                 |
| BT0358       | mammary gland                 |
| BT0359       | mammary gland                 |
| BT0360       | mammary gland                 |
| BT0398       | mammary gland                 |
| BT0399       | mammary gland                 |
| BT0400       | mammary gland                 |
| BT0402       | mammary gland                 |
| BT0403       | mammary gland                 |
| BT0407       | mammary gland                 |
| BT0529       | mammary gland                 |
| BT0532       | mammary gland                 |
| BT0564       | mammary gland                 |
| BT0566       | mammary gland                 |
| BT0569       | mammary gland                 |
| BT0583       | mammary gland                 |
| BT0584       | mammary gland                 |
| BT0586       | mammary gland                 |
| BT0595       | mammary gland                 |
| BT0601       | mammary gland                 |
| BT0602       | mammary gland                 |
| BT0603       | mammary gland                 |
| BT0604       | mammary gland                 |
| BT0605       | mammary gland                 |
| BT0606       | mammary gland                 |
| BT0608       | mammary gland                 |
| BT0609       | mammary gland                 |
| CN0007       | colon                         |
| CN0009       | colon                         |
| CN0012       | colon                         |
| CN0014       | colon                         |
| CN0016       | colon                         |
| CN0025       | colon                         |
| CN0026       | colon                         |
| CN0027       | colon                         |
| CN0028       | colon                         |

| cDNA Library | Designated Tissue for Library |
|--------------|-------------------------------|
| CN0029       | colon                         |
| CN0030       | colon                         |
| CN0033       | colon                         |
| CN0041       | colon                         |
| CN0042       | colon                         |
| CN0046       | colon                         |
| CN0048       | colon                         |
| CN0049       | colon                         |
| CN0050       | colon                         |
| CN0051       | colon                         |
| CN0053       | colon                         |
| CN0054       | colon                         |
| CN0056       | colon                         |
| CT0310       | colon                         |
| CT0364       | colon                         |
| CT0365       | colon                         |
| CT0366       | colon                         |
| DT0004       | uncharacterized tissue        |
| DT0020       | uncharacterized tissue        |
| DT0031       | uncharacterized tissue        |
| DT0063       | uncharacterized tissue        |
| DT0069       | uncharacterized tissue        |
| DT0070       | uncharacterized tissue        |
| DT0072       | uncharacterized tissue        |
| DT0080       | uncharacterized tissue        |
| DT0081       | uncharacterized tissue        |
| HT0358       | head and neck                 |
| HT0380       | head and neck                 |
| HT0398       | head and neck                 |
| HT0413       | thyroid                       |
| HT0433       | thyroid                       |
| HT0443       | thyroid                       |
| HT0468       | thyroid                       |
| HT0469       | thyroid                       |
| HT0481       | thyroid                       |
| HT0483       | thyroid                       |
| HT0485       | thyroid                       |
| HT0486       | thyroid                       |
| HT0487       | thyroid                       |
| HT0488       | thyroid                       |

| cDNA Library                               | Designated Tissue for Library |
|--------------------------------------------|-------------------------------|
| HT0491                                     | thyroid                       |
| HT0492                                     | thyroid                       |
| HT0505                                     | thyroid                       |
| HT0506                                     | thyroid                       |
| HT0507                                     | thyroid                       |
| HT0510                                     | thyroid                       |
| HT0528                                     | thyroid                       |
| LT0048                                     | muscle                        |
| LT0054                                     | muscle                        |
| LT0079                                     | muscle                        |
| PT0012                                     | uncharacterized tissue        |
| PT0018                                     | uncharacterized tissue        |
| PT0041                                     | uncharacterized tissue        |
| PT0045                                     | uncharacterized tissue        |
| ST0206                                     | stomach                       |
| ST0296                                     | stomach                       |
| ST0316                                     | stomach                       |
| ST0379                                     | stomach                       |
| UM0001                                     | uterus                        |
| UM0002                                     | uterus                        |
| UM0005                                     | uterus                        |
| SAGE_CAPAN1                                | pancreas                      |
| SAGE_CAPAN2                                | pancreas                      |
| SAGE_HS766T                                | pancreas                      |
| SAGE_Panc1                                 | pancreas                      |
| SAGE_HX                                    | pancreas                      |
| SAGE_H126                                  | pancreas                      |
| SAGE_Duke_H54_lacZ                         | brain                         |
| SAGE_Duke_H54_EGFRvIII                     | brain                         |
| Placenta Matchmaker cDNA library(Clontech) | uncharacterized tissue        |
| JAR cells, Homo sapiens                    | uncharacterized tissue        |
| Lupski_dorsal_root_ganglion                | nervous                       |
| Human rhabdomyosarcoma cDNA                | uncharacterized tissue        |
| Sugano cDNA library                        | uncharacterized tissue        |
| DDRT-PCR                                   | uncharacterized tissue        |
| SAGE_Duke_cerebellum                       | cerebellum                    |
| NIH_MGC_11                                 | placenta                      |
| HUVEC Subtracted Library 1                 | uncharacterized tissue        |
| SAGE_CPDR_LNCaP-C                          | prostate                      |
| SAGE_CPDR_LNCaP-T                          | prostate                      |

| cDNA Library                                      | Designated Tissue for Library |
|---------------------------------------------------|-------------------------------|
| SAGE_293-IND                                      | kidney                        |
| Homo sapiens prostate cancer                      | uncharacterized tissue        |
| Subtracted cDNA libraries from human Jurkat cells | uncharacterized tissue        |
| SAGE_PR317_normal_prostate                        | prostate                      |
| SAGE_PR317_prostate_tumor                         | prostate                      |
| gastric carcinoma cell SGC7901                    | uncharacterized tissue        |
| Homo sapiens entorhinal cortex adult/elderly      | uncharacterized tissue        |
| Clontech HL1008b                                  | uncharacterized tissue        |
| BN0020                                            | mammary gland                 |
| BT0197                                            | mammary gland                 |
| BT0219                                            | mammary gland                 |
| BT0230                                            | mammary gland                 |
| BT0363                                            | mammary gland                 |
| BT0512                                            | mammary gland                 |
| BT0582                                            | mammary gland                 |
| BT0585                                            | mammary gland                 |
| CN0032                                            | colon                         |
| CT0001                                            | colon                         |
| CT0006                                            | colon                         |
| CT0008                                            | colon                         |
| CT0009                                            | colon                         |
| CT0010                                            | colon                         |
| CT0011                                            | colon                         |
| CT0043                                            | colon                         |
| Homo sapiens acute myeloid leukemia               | uncharacterized tissue        |
| Human cardiac muscle expression library           | uncharacterized tissue        |
| BL2                                               | uncharacterized tissue        |
| Human Leukemia K562 Cell Line Express Library     | uncharacterized tissue        |
| NCI_CGAP_Br22                                     | mammary gland                 |
| pUC-derived chromosome 13 enriched cDNA library   | uncharacterized tissue        |
| FIBHBVA                                           | uncharacterized tissue        |
| UM0003                                            | uterus                        |
| UM0004                                            | uterus                        |
| UM0006                                            | uterus                        |
| UM0007                                            | uterus                        |
| UM0008                                            | uterus                        |
| UM0009                                            | uterus                        |
| UM0010                                            | uterus                        |
| UM0011                                            | uterus                        |
| UM0012                                            | uterus                        |

| cDNA Library | Designated Tissue for Library |
|--------------|-------------------------------|
| UM0014       | uterus                        |
| UM0015       | uterus                        |
| UM0016       | uterus                        |
| UM0017       | uterus                        |
| UM0018       | uterus                        |
| UM0019       | uterus                        |
| UM0020       | uterus                        |
| UM0021       | uterus                        |
| UM0022       | uterus                        |
| UM0023       | uterus                        |
| UM0024       | uterus                        |
| UM0025       | uterus                        |
| UM0026       | uterus                        |
| UM0027       | uterus                        |
| UM0028       | uterus                        |
| UM0029       | uterus                        |
| UM0030       | uterus                        |
| UM0031       | uterus                        |
| UM0032       | uterus                        |
| UM0033       | uterus                        |
| UM0034       | uterus                        |
| UM0035       | uterus                        |
| UM0036       | uterus                        |
| UM0037       | uterus                        |
| UM0038       | uterus                        |
| UM0039       | uterus                        |
| UM0040       | uterus                        |
| UM0041       | uterus                        |
| UM0042       | uterus                        |
| UM0043       | uterus                        |
| UM0044       | uterus                        |
| UM0045       | uterus                        |
| UM0046       | uterus                        |
| UM0047       | uterus                        |
| UM0049       | uterus                        |
| UM0050       | uterus                        |
| UM0051       | uterus                        |
| UM0052       | uterus                        |
| UM0053       | uterus                        |
| UM0054       | uterus                        |

| cDNA Library | Designated Tissue for Library |
|--------------|-------------------------------|
| UM0055       | uterus                        |
| UM0056       | uterus                        |
| UM0057       | uterus                        |
| UM0058       | uterus                        |
| UM0060       | uterus                        |
| UM0061       | uterus                        |
| UM0062       | uterus                        |
| UM0063       | uterus                        |
| UM0064       | uterus                        |
| UM0065       | uterus                        |
| UM0067       | uterus                        |
| UM0068       | uterus                        |
| UM0070       | uterus                        |
| UM0071       | uterus                        |
| UM0072       | uterus                        |
| UM0073       | uterus                        |
| UM0076       | uterus                        |
| UM0077       | uterus                        |
| UM0079       | uterus                        |
| UM0081       | uterus                        |
| UM0082       | uterus                        |
| UM0084       | uterus                        |
| UM0085       | uterus                        |
| UM0086       | uterus                        |
| UM0088       | uterus                        |
| UM0089       | uterus                        |
| UM0091       | uterus                        |
| UM0092       | uterus                        |
| UM0093       | uterus                        |
| UM0094       | uterus                        |
| UM0095       | uterus                        |
| UM0098       | uterus                        |
| UM0099       | uterus                        |
| UM0100       | uterus                        |
| UM0101       | uterus                        |
| UM0102       | uterus                        |
| UM0103       | uterus                        |
| UM0104       | uterus                        |
| UM0105       | uterus                        |
| UM0106       | uterus                        |

| cDNA Library | Designated Tissue for Library |
|--------------|-------------------------------|
| UM0108       | uterus                        |
| UM0109       | uterus                        |
| UM0111       | uterus                        |
| UM0112       | uterus                        |
| UM0113       | uterus                        |
| UM0114       | uterus                        |
| UM0115       | uterus                        |
| ST0001       | stomach                       |
| ST0002       | stomach                       |
| ST0003       | stomach                       |
| ST0004       | stomach                       |
| ST0006       | stomach                       |
| ST0009       | stomach                       |
| ST0014       | stomach                       |
| ST0026       | stomach                       |
| ST0062       | stomach                       |
| ST0079       | stomach                       |
| ST0141       | stomach                       |
| ST0143       | stomach                       |
| ST0167       | stomach                       |
| ST0270       | stomach                       |
| ST0294       | stomach                       |
| ST0298       | stomach                       |
| ST0305       | stomach                       |
| ST0309       | stomach                       |
| LT0013       | muscle                        |
| LT0014       | muscle                        |
| LT0015       | muscle                        |
| LT0019       | muscle                        |
| LT0026       | muscle                        |
| LT0033       | muscle                        |
| LT0035       | muscle                        |
| LT0036       | muscle                        |
| LT0037       | muscle                        |
| LT0038       | muscle                        |
| LT0039       | muscle                        |
| LT0051       | muscle                        |
| LT0053       | muscle                        |
| LT0055       | muscle                        |
| LT0071       | muscle                        |

| cDNA Library                                        | Designated Tissue for Library |
|-----------------------------------------------------|-------------------------------|
| LT0072                                              | muscle                        |
| LT0076                                              | muscle                        |
| LT0077                                              | muscle                        |
| LT0423                                              | muscle                        |
| Homo sapiens cerebrospinal fluid 51 year old female | uncharacterized tissue        |
| CN0002                                              | colon                         |
| CN0023                                              | colon                         |
| CN0024                                              | colon                         |
| CN0035                                              | colon                         |
| CN0036                                              | colon                         |
| CN0037                                              | colon                         |
| CN0038                                              | colon                         |
| CN0055                                              | colon                         |
| CN0057                                              | colon                         |
| NIH_MGC_39                                          | pancreas                      |
| NIH_MGC_44                                          | uterus                        |
| CT0045                                              | colon                         |
| CT0215                                              | colon                         |
| CT0216                                              | colon                         |
| CT0221                                              | colon                         |
| CT0319                                              | colon                         |
| CT0350                                              | colon                         |
| CT0352                                              | colon                         |
| CT0353                                              | colon                         |
| CT0354                                              | colon                         |
| CT0355                                              | colon                         |
| CT0367                                              | colon                         |
| CT0383                                              | colon                         |
| CT0386                                              | colon                         |
| CT0387                                              | colon                         |
| SN0004                                              | stomach                       |
| SN0005                                              | stomach                       |
| SN0007                                              | stomach                       |
| SN0009                                              | stomach                       |
| SN0010                                              | stomach                       |
| SN0011                                              | stomach                       |
| SN0012                                              | stomach                       |
| SN0013                                              | stomach                       |
| SN0014                                              | stomach                       |
| SN0015                                              | stomach                       |

| cDNA Library | Designated Tissue for Library |
|--------------|-------------------------------|
| SN0016       | stomach                       |
| SN0017       | stomach                       |
| SN0018       | stomach                       |
| SN0019       | stomach                       |
| SN0020       | stomach                       |
| SN0021       | stomach                       |
| SN0022       | stomach                       |
| SN0023       | stomach                       |
| SN0024       | stomach                       |
| SN0027       | stomach                       |
| SN0028       | stomach                       |
| SN0029       | stomach                       |
| SN0030       | stomach                       |
| SN0031       | stomach                       |
| SN0032       | stomach                       |
| SN0033       | stomach                       |
| FT0032       | prostate                      |
| FT0037       | prostate                      |
| FT0038       | prostate                      |
| FT0039       | prostate                      |
| FT0040       | prostate                      |
| FT0041       | prostate                      |
| FT0042       | prostate                      |
| FT0044       | prostate                      |
| FT0045       | prostate                      |
| FT0046       | prostate                      |
| FT0049       | prostate                      |
| FT0050       | prostate                      |
| FT0051       | prostate                      |
| FT0052       | prostate                      |
| FT0053       | prostate                      |
| FT0054       | prostate                      |
| FT0055       | prostate                      |
| FT0056       | prostate                      |
| FT0057       | prostate                      |
| FT0058       | prostate                      |
| FT0059       | prostate                      |
| FT0060       | prostate                      |
| FT0061       | prostate                      |
| FT0062       | prostate                      |

| cDNA Library | Designated Tissue for Library |
|--------------|-------------------------------|
| FT0067       | prostate                      |
| FT0068       | prostate                      |
| FT0069       | prostate                      |
| FT0070       | prostate                      |
| FT0071       | prostate                      |
| FT0073       | prostate                      |
| FT0074       | prostate                      |
| FT0077       | prostate                      |
| FT0079       | prostate                      |
| FT0080       | prostate                      |
| FT0082       | prostate                      |
| FT0083       | prostate                      |
| FT0089       | prostate                      |
| FT0093       | prostate                      |
| FT0095       | prostate                      |
| FT0096       | prostate                      |
| FT0097       | prostate                      |
| FT0099       | prostate                      |
| FT0100       | prostate                      |
| FT0101       | prostate                      |
| FT0103       | prostate                      |
| FT0104       | prostate                      |
| FT0111       | prostate                      |
| FT0115       | prostate                      |
| FT0116       | prostate                      |
| FT0117       | prostate                      |
| FT0119       | prostate                      |
| FT0122       | prostate                      |
| FT0123       | prostate                      |
| FT0126       | prostate                      |
| FT0128       | prostate                      |
| FT0129       | prostate                      |
| FT0130       | prostate                      |
| FT0131       | prostate                      |
| FT0133       | prostate                      |
| FT0134       | prostate                      |
| FT0144       | prostate                      |
| FT0145       | prostate                      |
| FT0148       | prostate                      |
| FT0149       | prostate                      |

| cDNA Library | Designated Tissue for Library |
|--------------|-------------------------------|
| FT0150       | prostate                      |
| FT0151       | prostate                      |
| FT0152       | prostate                      |
| FT0153       | prostate                      |
| FT0157       | prostate                      |
| FT0159       | prostate                      |
| FT0160       | prostate                      |
| FT0162       | prostate                      |
| FT0163       | prostate                      |
| FT0164       | prostate                      |
| FT0166       | prostate                      |
| FT0167       | prostate                      |
| FT0169       | prostate                      |
| FT0170       | prostate                      |
| FT0179       | prostate                      |
| FT0180       | prostate                      |
| FT0181       | prostate                      |
| FT0182       | prostate                      |
| PT0151       | uncharacterized tissue        |
| AN0001       | uncharacterized tissue        |
| AN0003       | uncharacterized tissue        |
| AN0004       | uncharacterized tissue        |
| AN0005       | uncharacterized tissue        |
| AN0006       | uncharacterized tissue        |
| AN0007       | uncharacterized tissue        |
| AN0012       | uncharacterized tissue        |
| AN0013       | uncharacterized tissue        |
| AN0014       | uncharacterized tissue        |
| AN0016       | uncharacterized tissue        |
| AN0017       | uncharacterized tissue        |
| AN0024       | uncharacterized tissue        |
| AN0025       | uncharacterized tissue        |
| AN0026       | uncharacterized tissue        |
| AN0027       | uncharacterized tissue        |
| AN0029       | uncharacterized tissue        |
| AN0032       | uncharacterized tissue        |
| AN0033       | uncharacterized tissue        |
| AN0034       | uncharacterized tissue        |
| AN0038       | uncharacterized tissue        |
| AN0040       | uncharacterized tissue        |

| cDNA Library | Designated Tissue for Library |
|--------------|-------------------------------|
| AN0041       | uncharacterized tissue        |
| AN0042       | uncharacterized tissue        |
| AN0047       | uncharacterized tissue        |
| AN0048       | uncharacterized tissue        |
| AN0056       | uncharacterized tissue        |
| AN0058       | uncharacterized tissue        |
| AN0059       | uncharacterized tissue        |
| AN0060       | uncharacterized tissue        |
| AN0061       | uncharacterized tissue        |
| AN0062       | uncharacterized tissue        |
| AN0075       | uncharacterized tissue        |
| AN0078       | uncharacterized tissue        |
| AN0079       | uncharacterized tissue        |
| AN0081       | uncharacterized tissue        |
| AN0088       | uncharacterized tissue        |
| AN0094       | uncharacterized tissue        |
| BN0098       | mammary gland                 |
| BN0149       | mammary gland                 |
| BN0150       | mammary gland                 |
| BN0177       | mammary gland                 |
| BN0178       | mammary gland                 |
| BN0179       | mammary gland                 |
| BN0188       | mammary gland                 |
| BN0191       | mammary gland                 |
| BN0209       | mammary gland                 |
| BN0210       | mammary gland                 |
| BN0212       | mammary gland                 |
| BN0213       | mammary gland                 |
| BN0214       | mammary gland                 |
| BN0215       | mammary gland                 |
| BN0216       | mammary gland                 |
| BN0227       | mammary gland                 |
| BN0232       | mammary gland                 |
| BN0233       | mammary gland                 |
| BN0234       | mammary gland                 |
| BN0235       | mammary gland                 |
| BN0236       | mammary gland                 |
| BN0237       | mammary gland                 |
| BN0238       | mammary gland                 |
| BN0243       | mammary gland                 |

| cDNA Library | Designated Tissue for Library |
|--------------|-------------------------------|
| BN0245       | mammary gland                 |
| BN0246       | mammary gland                 |
| BN0247       | mammary gland                 |
| BN0248       | mammary gland                 |
| BN0252       | mammary gland                 |
| BN0253       | mammary gland                 |
| BN0254       | mammary gland                 |
| BN0255       | mammary gland                 |
| BN0256       | mammary gland                 |
| BN0257       | mammary gland                 |
| BN0258       | mammary gland                 |
| BN0259       | mammary gland                 |
| BN0260       | mammary gland                 |
| BN0262       | mammary gland                 |
| BN0263       | mammary gland                 |
| BN0264       | mammary gland                 |
| BN0266       | mammary gland                 |
| BN0267       | mammary gland                 |
| BN0268       | mammary gland                 |
| BN0269       | mammary gland                 |
| BN0270       | mammary gland                 |
| BN0271       | mammary gland                 |
| BN0272       | mammary gland                 |
| BN0273       | mammary gland                 |
| BN0274       | mammary gland                 |
| BN0275       | mammary gland                 |
| BN0276       | mammary gland                 |
| BN0277       | mammary gland                 |
| BN0278       | mammary gland                 |
| BN0279       | mammary gland                 |
| BN0280       | mammary gland                 |
| BN0282       | mammary gland                 |
| BN0283       | mammary gland                 |
| BN0284       | mammary gland                 |
| BN0294       | mammary gland                 |
| BN0295       | mammary gland                 |
| BN0296       | mammary gland                 |
| BN0297       | mammary gland                 |
| BN0298       | mammary gland                 |
| BN0299       | mammary gland                 |

| cDNA Library                                       | Designated Tissue for Library |
|----------------------------------------------------|-------------------------------|
| BN0300                                             | mammary gland                 |
| BN0301                                             | mammary gland                 |
| BN0302                                             | mammary gland                 |
| BN0303                                             | mammary gland                 |
| BN0304                                             | mammary gland                 |
| BN0305                                             | mammary gland                 |
| BN0306                                             | mammary gland                 |
| BN0308                                             | mammary gland                 |
| BN0309                                             | mammary gland                 |
| BN0310                                             | mammary gland                 |
| BN0311                                             | mammary gland                 |
| BN0312                                             | mammary gland                 |
| BN0313                                             | mammary gland                 |
| BN0314                                             | mammary gland                 |
| BN0316                                             | mammary gland                 |
| BN0318                                             | mammary gland                 |
| BN0319                                             | mammary gland                 |
| BN0320                                             | mammary gland                 |
| BN0323                                             | mammary gland                 |
| BN0324                                             | mammary gland                 |
| BN0325                                             | mammary gland                 |
| BN0326                                             | mammary gland                 |
| BN0327                                             | mammary gland                 |
| BN0328                                             | mammary gland                 |
| BN0329                                             | mammary gland                 |
| BN0332                                             | mammary gland                 |
| BN0333                                             | mammary gland                 |
| BN0334                                             | mammary gland                 |
| BN0335                                             | mammary gland                 |
| BN0348                                             | mammary gland                 |
| BN0349                                             | mammary gland                 |
| BN0357                                             | mammary gland                 |
| BN0358                                             | mammary gland                 |
| BN0359                                             | mammary gland                 |
| BN0360                                             | mammary gland                 |
| BN0361                                             | mammary gland                 |
| BN0362                                             | mammary gland                 |
| BN0363                                             | mammary gland                 |
| SAGE_LN-1                                          | prostate                      |
| Human kidney suppression subtractive hybridization | uncharacterized tissue        |

| cDNA Library | Designated Tissue for Library |
|--------------|-------------------------------|
| EN0009       | lung                          |
| EN0010       | lung                          |
| EN0018       | lung                          |
| EN0023       | lung                          |
| EN0025       | lung                          |
| EN0026       | lung                          |
| EN0029       | lung                          |
| EN0030       | lung                          |
| EN0031       | lung                          |
| EN0042       | lung                          |
| EN0220       | lung                          |
| ET0005       | lung                          |
| ET0008       | lung                          |
| ET0009       | lung                          |
| ET0011       | lung                          |
| ET0014       | lung                          |
| ET0015       | lung                          |
| ET0016       | lung                          |
| ET0026       | lung                          |
| ET0028       | lung                          |
| ET0029       | lung                          |
| ET0030       | lung                          |
| ET0031       | lung                          |
| ET0037       | lung                          |
| ET0038       | lung                          |
| ET0042       | lung                          |
| ET0043       | lung                          |
| ET0044       | lung                          |
| ET0045       | lung                          |
| ET0046       | lung                          |
| ET0047       | lung                          |
| ET0058       | lung                          |
| ET0060       | lung                          |
| ET0061       | lung                          |
| ET0063       | lung                          |
| ET0066       | lung                          |
| ET0067       | lung                          |
| ET0068       | lung                          |
| ET0070       | lung                          |
| ET0072       | lung                          |

| cDNA Library | Designated Tissue for Library |
|--------------|-------------------------------|
| ET0073       | lung                          |
| ET0074       | lung                          |
| ET0078       | lung                          |
| ET0079       | lung                          |
| ET0080       | lung                          |
| ET0081       | lung                          |
| ET0082       | lung                          |
| ET0084       | lung                          |
| FN0004       | prostate                      |
| FN0005       | prostate                      |
| FN0006       | prostate                      |
| FN0007       | prostate                      |
| FN0009       | prostate                      |
| FN0010       | prostate                      |
| FN0011       | prostate                      |
| FN0012       | prostate                      |
| FN0019       | prostate                      |
| FN0020       | prostate                      |
| FN0021       | prostate                      |
| FN0022       | prostate                      |
| FN0023       | prostate                      |
| FN0025       | prostate                      |
| FN0026       | prostate                      |
| FN0027       | prostate                      |
| FN0028       | prostate                      |
| FN0037       | prostate                      |
| FN0039       | prostate                      |
| FN0046       | prostate                      |
| FN0047       | prostate                      |
| FN0048       | prostate                      |
| FN0050       | prostate                      |
| FN0053       | prostate                      |
| FN0055       | prostate                      |
| FN0056       | prostate                      |
| FN0057       | prostate                      |
| FN0058       | prostate                      |
| FN0059       | prostate                      |
| FN0060       | prostate                      |
| FN0061       | prostate                      |
| FN0063       | prostate                      |

| cDNA Library | Designated Tissue for Library |
|--------------|-------------------------------|
| FN0064       | prostate                      |
| FN0066       | prostate                      |
| FN0067       | prostate                      |
| FN0068       | prostate                      |
| FN0070       | prostate                      |
| FN0071       | prostate                      |
| FN0072       | prostate                      |
| FN0073       | prostate                      |
| FN0074       | prostate                      |
| FN0080       | prostate                      |
| FN0081       | prostate                      |
| FN0084       | prostate                      |
| FN0086       | prostate                      |
| FN0088       | prostate                      |
| FN0089       | prostate                      |
| FN0090       | prostate                      |
| FN0094       | prostate                      |
| FN0096       | prostate                      |
| FN0097       | prostate                      |
| FN0098       | prostate                      |
| FN0100       | prostate                      |
| FN0102       | prostate                      |
| FN0103       | prostate                      |
| FN0104       | prostate                      |
| FN0105       | prostate                      |
| FN0106       | prostate                      |
| FN0107       | prostate                      |
| FN0108       | prostate                      |
| FN0109       | prostate                      |
| FN0110       | prostate                      |
| FN0111       | prostate                      |
| FN0112       | prostate                      |
| FN0113       | prostate                      |
| FN0114       | prostate                      |
| FN0115       | prostate                      |
| FN0116       | prostate                      |
| FN0119       | prostate                      |
| FN0124       | prostate                      |
| FN0127       | prostate                      |
| FN0133       | prostate                      |

| cDNA Library | Designated Tissue for Library |
|--------------|-------------------------------|
| FN0138       | prostate                      |
| FN0139       | prostate                      |
| FN0140       | prostate                      |
| FN0141       | prostate                      |
| FN0142       | prostate                      |
| FN0143       | prostate                      |
| FN0149       | prostate                      |
| FN0150       | prostate                      |
| FN0152       | prostate                      |
| FN0155       | prostate                      |
| FN0156       | prostate                      |
| FN0157       | prostate                      |
| FN0162       | prostate                      |
| FN0164       | prostate                      |
| FN0165       | prostate                      |
| FN0178       | prostate                      |
| FN0180       | prostate                      |
| FN0181       | prostate                      |
| FN0182       | prostate                      |
| FN0183       | prostate                      |
| FN0186       | prostate                      |
| FN0188       | prostate                      |
| FN0769       | prostate                      |
| MT0016       | whole blood                   |
| MT0017       | whole blood                   |
| MT0018       | whole blood                   |
| MT0020       | whole blood                   |
| MT0022       | whole blood                   |
| MT0023       | whole blood                   |
| MT0024       | whole blood                   |
| MT0025       | whole blood                   |
| MT0026       | whole blood                   |
| MT0027       | whole blood                   |
| MT0028       | whole blood                   |
| MT0030       | whole blood                   |
| MT0031       | whole blood                   |
| MT0032       | whole blood                   |
| MT0033       | whole blood                   |
| MT0034       | whole blood                   |
| MT0035       | whole blood                   |

| cDNA Library | Designated Tissue for Library |
|--------------|-------------------------------|
| MT0036       | whole blood                   |
| MT0037       | whole blood                   |
| MT0038       | whole blood                   |
| MT0039       | whole blood                   |
| MT0040       | whole blood                   |
| MT0042       | whole blood                   |
| MT0043       | whole blood                   |
| MT0044       | whole blood                   |
| MT0049       | whole blood                   |
| MT0050       | whole blood                   |
| MT0051       | whole blood                   |
| MT0052       | whole blood                   |
| MT0056       | whole blood                   |
| MT0057       | whole blood                   |
| MT0058       | whole blood                   |
| MT0059       | whole blood                   |
| MT0060       | whole blood                   |
| MT0061       | whole blood                   |
| MT0064       | whole blood                   |
| MT0065       | whole blood                   |
| MT0067       | whole blood                   |
| MT0068       | whole blood                   |
| MT0069       | whole blood                   |
| MT0070       | whole blood                   |
| MT0071       | whole blood                   |
| MT0072       | whole blood                   |
| MT0074       | whole blood                   |
| MT0075       | whole blood                   |
| MT0076       | whole blood                   |
| MT0077       | whole blood                   |
| MT0078       | whole blood                   |
| MT0097       | whole blood                   |
| MT0098       | whole blood                   |
| MT0099       | whole blood                   |
| MT0100       | whole blood                   |
| MT0101       | whole blood                   |
| MT0107       | whole blood                   |
| MT0108       | whole blood                   |
| MT0109       | whole blood                   |
| MT0111       | whole blood                   |

| cDNA Library | Designated Tissue for Library |
|--------------|-------------------------------|
| MT0112       | whole blood                   |
| MT0113       | whole blood                   |
| MT0114       | whole blood                   |
| MT0115       | whole blood                   |
| MT0116       | whole blood                   |
| MT0117       | whole blood                   |
| MT0118       | whole blood                   |
| MT0119       | whole blood                   |
| MT0120       | whole blood                   |
| MT0121       | whole blood                   |
| MT0124       | whole blood                   |
| MT0125       | whole blood                   |
| MT0454       | whole blood                   |
| OT0034       | ovary                         |
| SN0006       | stomach                       |
| SN0008       | stomach                       |
| SN0041       | stomach                       |
| SN0054       | stomach                       |
| SN0057       | stomach                       |
| SN0076       | stomach                       |
| SN0077       | stomach                       |
| SN0078       | stomach                       |
| SN0080       | stomach                       |
| TN0001       | testis                        |
| TN0002       | testis                        |
| TN0004       | testis                        |
| TN0008       | testis                        |
| TN0016       | testis                        |
| TN0019       | testis                        |
| TN0024       | testis                        |
| TN0026       | testis                        |
| TN0027       | testis                        |
| TN0028       | testis                        |
| TN0029       | testis                        |
| TN0032       | testis                        |
| TN0033       | testis                        |
| TN0034       | testis                        |
| TN0035       | testis                        |
| TN0036       | testis                        |
| TN0038       | testis                        |

| cDNA Library                                                     | Designated Tissue for Library |
|------------------------------------------------------------------|-------------------------------|
| TN0039                                                           | testis                        |
| TN0040                                                           | testis                        |
| TN0041                                                           | testis                        |
| TN0042                                                           | testis                        |
| TN0043                                                           | testis                        |
| TN0061                                                           | testis                        |
| TN0063                                                           | testis                        |
| TN0064                                                           | testis                        |
| TN0065                                                           | testis                        |
| TN0066                                                           | testis                        |
| TN0067                                                           | testis                        |
| TN0068                                                           | testis                        |
| TN0069                                                           | testis                        |
| TN0070                                                           | testis                        |
| TN0075                                                           | testis                        |
| TN0078                                                           | testis                        |
| TN0079                                                           | testis                        |
| TN0080                                                           | testis                        |
| TN0082                                                           | testis                        |
| TN0093                                                           | testis                        |
| TN0094                                                           | testis                        |
| TN0125                                                           | testis                        |
| TN0165                                                           | testis                        |
| Homo sapiens skin melanocytic cells                              | uncharacterized tissue        |
| Homo sapiens HeLa                                                | uncharacterized tissue        |
| GKA                                                              | uncharacterized tissue        |
| GKB                                                              | liver                         |
| GKC                                                              | liver                         |
| GKD                                                              | uncharacterized tissue        |
| SAGE_MESO-12                                                     | uncharacterized tissue        |
| Homo sapiens rheumatoid arthritis fibroblast-like synovial cells | uncharacterized tissue        |
| NCI_CGAP_Brn64                                                   | pineal gland                  |
| NCI_CGAP_Brn65                                                   | brain                         |
| NCI_CGAP_Brn66                                                   | brain                         |
| NCI_CGAP_Brn67                                                   | brain                         |
| NCI_CGAP_Brn70                                                   | brain                         |
| AN0036                                                           | uncharacterized tissue        |
| AN0037                                                           | uncharacterized tissue        |
| AN0039                                                           | uncharacterized tissue        |
| AN0064                                                           | uncharacterized tissue        |

| cDNA Library | Designated Tissue for Library |
|--------------|-------------------------------|
| AN0066       | uncharacterized tissue        |
| AN0076       | uncharacterized tissue        |
| AN0077       | uncharacterized tissue        |
| AN0085       | uncharacterized tissue        |
| AN0086       | uncharacterized tissue        |
| AN0087       | uncharacterized tissue        |
| AN0089       | uncharacterized tissue        |
| AN0090       | uncharacterized tissue        |
| AN0091       | uncharacterized tissue        |
| AN0092       | uncharacterized tissue        |
| AN0093       | uncharacterized tissue        |
| AN0095       | uncharacterized tissue        |
| AN0096       | uncharacterized tissue        |
| BN0062       | mammary gland                 |
| BN0364       | mammary gland                 |
| BN0365       | mammary gland                 |
| BT0634       | mammary gland                 |
| BT0661       | mammary gland                 |
| BT0674       | mammary gland                 |
| BT0676       | mammary gland                 |
| BT06786      | mammary gland                 |
| BT0684       | mammary gland                 |
| CT0269       | colon                         |
| CT0395       | colon                         |
| CT0451       | colon                         |
| CT0461       | colon                         |
| CT0462       | colon                         |
| CT0463       | colon                         |
| CT0465       | colon                         |
| CT0466       | colon                         |
| CT0467       | colon                         |
| CT0469       | colon                         |
| CT0478       | colon                         |
| CT0479       | colon                         |
| CT0480       | colon                         |
| CT0481       | colon                         |
| CT0482       | colon                         |
| CT0485       | colon                         |
| CT0497       | colon                         |
| CT0500       | colon                         |

| cDNA Library | Designated Tissue for Library |
|--------------|-------------------------------|
| CT0505       | colon                         |
| CT0506       | colon                         |
| CT0507       | colon                         |
| CT0508       | colon                         |
| CT0510       | colon                         |
| CT0511       | colon                         |
| CT0512       | colon                         |
| CT0513       | colon                         |
| CT0516       | colon                         |
| CT0593       | colon                         |
| FN0184       | prostate                      |
| FT0175       | prostate                      |
| FT0176       | prostate                      |
| GN0012       | placenta                      |
| GN0015       | placenta                      |
| GN0016       | placenta                      |
| GN0018       | placenta                      |
| GN0019       | placenta                      |
| GN0020       | placenta                      |
| GN0024       | placenta                      |
| GN0025       | placenta                      |
| GN0027       | placenta                      |
| GN0029       | placenta                      |
| GN0032       | placenta                      |
| GN0033       | placenta                      |
| GN0039       | placenta                      |
| GN0040       | placenta                      |
| GN0048       | placenta                      |
| GN0051       | placenta                      |
| GN0053       | placenta                      |
| GN0054       | placenta                      |
| GN0056       | placenta                      |
| GN0057       | placenta                      |
| GN0058       | placenta                      |
| GN0059       | placenta                      |
| GN0064       | placenta                      |
| GN0067       | placenta                      |
| GN0070       | placenta                      |
| GN0071       | placenta                      |
| GN0072       | placenta                      |

| cDNA Library | Designated Tissue for Library |
|--------------|-------------------------------|
| GN0073       | placenta                      |
| GN0074       | placenta                      |
| GN0075       | placenta                      |
| GN0076       | placenta                      |
| GN0085       | placenta                      |
| HT0570       | thyroid                       |
| HT0616       | thyroid                       |
| HT0617       | thyroid                       |
| HT0656       | head and neck                 |
| HT0817       | head and neck                 |
| HT0860       | head and neck                 |
| HT0870       | head and neck                 |
| HT0873       | head and neck                 |
| HT0874       | head and neck                 |
| HT0879       | head and neck                 |
| HT0884       | head and neck                 |
| HT0888       | head and neck                 |
| HT0890       | head and neck                 |
| HT0892       | head and neck                 |
| HT0900       | head and neck                 |
| HT0906       | head and neck                 |
| HT0907       | head and neck                 |
| HT0911       | head and neck                 |
| HT0912       | head and neck                 |
| HT0913       | head and neck                 |
| HT0914       | head and neck                 |
| HT0915       | head and neck                 |
| HT0917       | head and neck                 |
| HT0918       | head and neck                 |
| HT0919       | head and neck                 |
| HT0923       | head and neck                 |
| HT0926       | head and neck                 |
| HT0927       | head and neck                 |
| HT0929       | head and neck                 |
| HT0931       | head and neck                 |
| HT0932       | head and neck                 |
| HT0933       | head and neck                 |
| HT0935       | head and neck                 |
| HT0939       | head and neck                 |
| HT0940       | head and neck                 |

| cDNA Library | Designated Tissue for Library |
|--------------|-------------------------------|
| HT0943       | head and neck                 |
| HT0944       | head and neck                 |
| HT0952       | head and neck                 |
| MT0104       | whole blood                   |
| MT0105       | whole blood                   |
| MT0106       | whole blood                   |
| MT0110       | whole blood                   |
| MT0126       | whole blood                   |
| MT0127       | whole blood                   |
| NN0042       | cerebrum                      |
| NN0044       | cerebrum                      |
| NN0045       | cerebrum                      |
| NN0131       | cerebrum                      |
| NN1042       | cerebrum                      |
| NN1049       | cerebrum                      |
| NN1128       | cerebrum                      |
| ST0360       | stomach                       |
| TN0020       | testis                        |
| TN0021       | testis                        |
| TN0023       | testis                        |
| TN0025       | testis                        |
| TN0030       | testis                        |
| TN0037       | testis                        |
| TN0044       | testis                        |
| TN0045       | testis                        |
| TN0046       | testis                        |
| TN0047       | testis                        |
| TN0048       | testis                        |
| TN0049       | testis                        |
| TN0050       | testis                        |
| TN0055       | testis                        |
| TN0060       | testis                        |
| TN0077       | testis                        |
| TN0083       | testis                        |
| TN0084       | testis                        |
| TN0086       | testis                        |
| TN0095       | testis                        |
| TN0096       | testis                        |
| TN0097       | testis                        |
| TN0098       | testis                        |

| cDNA Library | Designated Tissue for Library |
|--------------|-------------------------------|
| TN0108       | testis                        |
| TN0113       | testis                        |
| TN0117       | testis                        |
| TN0118       | testis                        |
| TN0119       | testis                        |
| TN0120       | testis                        |
| TN0121       | testis                        |
| TN0122       | testis                        |
| TN0123       | testis                        |
| TN0124       | testis                        |
| TN0128       | testis                        |
| TN0129       | testis                        |
| TN0130       | testis                        |
| TN0131       | testis                        |
| TN0132       | testis                        |
| TN0133       | testis                        |
| TN0143       | testis                        |
| TN0184       | testis                        |
| UT0002       | uterus                        |
| UT0004       | uterus                        |
| UT0007       | uterus                        |
| UT0009       | uterus                        |
| UT0010       | uterus                        |
| UT0011       | uterus                        |
| UT0018       | uterus                        |
| UT0019       | uterus                        |
| UT0032       | uterus                        |
| UT0036       | uterus                        |
| UT0040       | uterus                        |
| UT0050       | uterus                        |
| UT0056       | uterus                        |
| UT0058       | uterus                        |
| UT0059       | uterus                        |
| UT0060       | uterus                        |
| UT0061       | uterus                        |
| UT0062       | uterus                        |
| UT0063       | uterus                        |
| UT0064       | uterus                        |
| UT0065       | uterus                        |
| UT0068       | uterus                        |

| cDNA Library                                             | Designated Tissue for Library |
|----------------------------------------------------------|-------------------------------|
| UT0069                                                   | uterus                        |
| UT0071                                                   | uterus                        |
| UT0072                                                   | uterus                        |
| UT0074                                                   | uterus                        |
| UT0082                                                   | uterus                        |
| ADA                                                      | endocrine                     |
| ADB                                                      | endocrine                     |
| ADC                                                      | endocrine                     |
| Cu                                                       | adrenal cortex                |
| DCA                                                      | uncharacterized tissue        |
| SAGE_Duke_H306                                           | uncharacterized tissue        |
| Human HO-1 melanoma cells                                | uncharacterized tissue        |
| Homo sapiens skin adult differential display             | uncharacterized tissue        |
| DCB                                                      | uncharacterized tissue        |
| GK                                                       | uncharacterized tissue        |
| FHTA                                                     | uncharacterized tissue        |
| FHTB                                                     | uncharacterized tissue        |
| HTB                                                      | brain                         |
| HTC                                                      | brain                         |
| HTE                                                      | brain                         |
| HTF                                                      | brain                         |
| cdA                                                      | endocrine                     |
| Human esophageal cancer differentially expressed library | uncharacterized tissue        |
| CB                                                       | whole blood                   |
| NP1                                                      | uncharacterized tissue        |
| NPA                                                      | pituitary gland               |
| NPB                                                      | uncharacterized tissue        |
| NPC                                                      | pituitary gland               |
| NPD                                                      | pituitary gland               |
| TP                                                       | pituitary gland               |
| AN0063                                                   | uncharacterized tissue        |
| AN0067                                                   | uncharacterized tissue        |
| AN0069                                                   | uncharacterized tissue        |
| AN0082                                                   | uncharacterized tissue        |
| AN0083                                                   | uncharacterized tissue        |
| AN0084                                                   | uncharacterized tissue        |
| BN0376                                                   | mammary gland                 |
| BN0377                                                   | mammary gland                 |
| BN0378                                                   | mammary gland                 |
| BN0379                                                   | mammary gland                 |

| cDNA Library | Designated Tissue for Library |
|--------------|-------------------------------|
| BN0394       | mammary gland                 |
| BN0395       | mammary gland                 |
| BN0396       | mammary gland                 |
| BN0397       | mammary gland                 |
| BN0398       | mammary gland                 |
| BT0812       | mammary gland                 |
| BT0813       | mammary gland                 |
| BT0820       | mammary gland                 |
| BT0821       | mammary gland                 |
| CI0005       | colon                         |
| CI0006       | colon                         |
| CI0010       | colon                         |
| CI0015       | colon                         |
| CI0017       | colon                         |
| CI0018       | colon                         |
| CS0007       | colon                         |
| CS0010       | colon                         |
| CS0011       | colon                         |
| CS0012       | colon                         |
| CT0086       | colon                         |
| CT0437       | colon                         |
| CT0452       | colon                         |
| CT0454       | colon                         |
| CT0456       | colon                         |
| CT0458       | colon                         |
| CT0459       | colon                         |
| CT0486       | colon                         |
| CT0487       | colon                         |
| CT0488       | colon                         |
| CT0514       | colon                         |
| CT0515       | colon                         |
| CT0520       | colon                         |
| CT0522       | colon                         |
| CT0523       | colon                         |
| CT0524       | colon                         |
| CT0527       | colon                         |
| CT0528       | colon                         |
| CT0529       | colon                         |
| CT0531       | colon                         |
| CT0532       | colon                         |

| cDNA Library | Designated Tissue for Library |
|--------------|-------------------------------|
| CT0534       | colon                         |
| GN0014       | placenta                      |
| GN0017       | placenta                      |
| GN0030       | placenta                      |
| GN0031       | placenta                      |
| GN0034       | placenta                      |
| GN0035       | placenta                      |
| GN0038       | placenta                      |
| GN0055       | placenta                      |
| GN0077       | placenta                      |
| GN0079       | placenta                      |
| GN0080       | placenta                      |
| GN0081       | placenta                      |
| GN0083       | placenta                      |
| GN0084       | placenta                      |
| GN0087       | placenta                      |
| GN0089       | placenta                      |
| GN0090       | placenta                      |
| GN0091       | placenta                      |
| GN0092       | placenta                      |
| HT0540       | thyroid                       |
| HT0541       | thyroid                       |
| HT0908       | head and neck                 |
| HT0909       | head and neck                 |
| HT0916       | head and neck                 |
| HT0920       | head and neck                 |
| HT0921       | head and neck                 |
| HT0922       | head and neck                 |
| HT0925       | head and neck                 |
| HT0930       | head and neck                 |
| HT0945       | head and neck                 |
| HT0946       | head and neck                 |
| HT0947       | head and neck                 |
| HT0948       | head and neck                 |
| HT0949       | head and neck                 |
| HT0955       | head and neck                 |
| HT0956       | head and neck                 |
| NN1140       | brain                         |
| NN1141       | brain                         |
| SN0079       | stomach                       |

| cDNA Library | Designated Tissue for Library |
|--------------|-------------------------------|
| TN0022       | testis                        |
| TN0071       | testis                        |
| TN0072       | testis                        |
| TN0073       | testis                        |
| TN0099       | testis                        |
| TN0101       | testis                        |
| TN0103       | testis                        |
| TN0104       | testis                        |
| TN0106       | testis                        |
| TN0107       | testis                        |
| TN0109       | testis                        |
| TN0110       | testis                        |
| TN0111       | testis                        |
| TN0112       | testis                        |
| TN0114       | testis                        |
| TN0115       | testis                        |
| TN0126       | testis                        |
| TN0135       | testis                        |
| TN0136       | testis                        |
| TN0138       | testis                        |
| TN0139       | testis                        |
| TN0140       | testis                        |
| TN0141       | testis                        |
| TN0148       | testis                        |
| TN0149       | testis                        |
| TN0150       | testis                        |
| TN0154       | testis                        |
| TN0155       | testis                        |
| TN0156       | testis                        |
| TN0162       | testis                        |
| UT0006       | uterus                        |
| UT0042       | uterus                        |
| UT0043       | uterus                        |
| UT0044       | uterus                        |
| UT0045       | uterus                        |
| UT0046       | uterus                        |
| UT0047       | uterus                        |
| UT0052       | uterus                        |
| UT0053       | uterus                        |
| UT0073       | uterus                        |

| cDNA Library                        | Designated Tissue for Library |
|-------------------------------------|-------------------------------|
| UT0075                              | uterus                        |
| UT0076                              | uterus                        |
| UT0077                              | uterus                        |
| UT0078                              | uterus                        |
| UT0087                              | uterus                        |
| UT0091                              | uterus                        |
| Soares_NPBMC                        | whole blood                   |
| BM                                  | bone marrow                   |
| MDS                                 | bone marrow                   |
| HEMBA1                              | head and neck                 |
| HEMBA1                              | uncharacterized tissue        |
| MAMMA1                              | mammary gland                 |
| SAGE_Duke_H566                      | uncharacterized tissue        |
| NT2RM1                              | nervous                       |
| NT2RM2                              | nervous                       |
| NT2RM4                              | nervous                       |
| NT2RP1                              | nervous                       |
| NT2RP2                              | nervous                       |
| NT2RP3                              | nervous                       |
| NT2RP4                              | nervous                       |
| NT2RP5                              | uncharacterized tissue        |
| OVARC1                              | ovary                         |
| PLACE1                              | placenta                      |
| PLACE2                              | placenta                      |
| PLACE3                              | placenta                      |
| PLACE4                              | placenta                      |
| SKNMC1                              | uncharacterized tissue        |
| THYRO1                              | thyroid                       |
| VESEN1                              | uncharacterized tissue        |
| Y79AA1                              | eye                           |
| SAGE_Duke_precrisis_fibroblasts_B   | uncharacterized tissue        |
| SAGE_Duke_post_crisis_fibroblasts_B | uncharacterized tissue        |
| NIH_MGC_95                          | cerebrum                      |
| NIH_MGC_96                          | brain                         |
| NIH_MGC_97                          | testis                        |
| SAGE_PERITO-13                      | soft tissue                   |
| HT0950                              | head and neck                 |
| HT0951                              | head and neck                 |
| BN0380                              | mammary gland                 |
| BN0386                              | mammary gland                 |

| cDNA Library                               | Designated Tissue for Library |
|--------------------------------------------|-------------------------------|
| BN0387                                     | mammary gland                 |
| BN0388                                     | mammary gland                 |
| BN0390                                     | mammary gland                 |
| BN0406                                     | mammary gland                 |
| BN0408                                     | mammary gland                 |
| BN0409                                     | mammary gland                 |
| BN0410                                     | mammary gland                 |
| BN0422                                     | mammary gland                 |
| BT0807                                     | mammary gland                 |
| BT0811                                     | mammary gland                 |
| BT0817                                     | mammary gland                 |
| BT0832                                     | mammary gland                 |
| BT0833                                     | mammary gland                 |
| BT0839                                     | mammary gland                 |
| BT0847                                     | mammary gland                 |
| BT0848                                     | mammary gland                 |
| BT0849                                     | mammary gland                 |
| BT0850                                     | mammary gland                 |
| BT0851                                     | mammary gland                 |
| Homo sapiens BE1                           | uncharacterized tissue        |
| Myeloma (PCL) cDNA library                 | whole blood                   |
| Myeloma (MYE) cDNA library                 | bone marrow                   |
| Human fetal mesenchymal stem cells library | uncharacterized tissue        |
| Homo sapiens HepG2                         | uncharacterized tissue        |
| Human H526 cDNA library                    | uncharacterized tissue        |
| Human HBEC cDNA library                    | uncharacterized tissue        |
| SAGE_Duke_H275                             | uncharacterized tissue        |
| Human esophageal carcinoma mRNA            | uncharacterized tissue        |
| NIH_MGC_84                                 | adrenal cortex                |
| NIH_MGC_85                                 | lymph node                    |
| NIH_MGC_86                                 | bone                          |
| NIH_MGC_87                                 | mammary gland                 |
| NIH_MGC_88                                 | gastrointestinal tract        |
| human gastric cancer cell line             | uncharacterized tissue        |
| CI0002                                     | colon                         |
| CI0007                                     | colon                         |
| CI0008                                     | colon                         |
| CI0019                                     | colon                         |
| CI0021                                     | colon                         |
| CI0022                                     | colon                         |

| cDNA Library                            | Designated Tissue for Library |
|-----------------------------------------|-------------------------------|
| CI0028                                  | colon                         |
| CI0037                                  | colon                         |
| CI0045                                  | colon                         |
| CS0005                                  | colon                         |
| CS0008                                  | colon                         |
| CS0009                                  | colon                         |
| CS0017                                  | colon                         |
| CS0018                                  | colon                         |
| CS0021                                  | colon                         |
| CS0022                                  | colon                         |
| CS0027                                  | colon                         |
| CS0030                                  | colon                         |
| CS0066                                  | colon                         |
| CT0518                                  | colon                         |
| CT0519                                  | colon                         |
| CT0521                                  | colon                         |
| CT0543                                  | colon                         |
| CT0550                                  | colon                         |
| CT0554                                  | colon                         |
| CT0558                                  | colon                         |
| CT0560                                  | colon                         |
| CT0563                                  | colon                         |
| CT0564                                  | colon                         |
| CT0577                                  | colon                         |
| CT0581                                  | colon                         |
| CT5001                                  | colon                         |
| CT5002                                  | colon                         |
| CT5003                                  | colon                         |
| Homo sapiens adult brain (Stavrides GS) | uncharacterized tissue        |
| Homo sapiens fetal brain (Stavrides GS) | uncharacterized tissue        |
| Homo sapiens Testis (Stavrides GS)      | uncharacterized tissue        |
| Homo sapiens adult lung (Stavrides GS)  | uncharacterized tissue        |
| Homo sapiens fetal lung (Stavrides GS)  | uncharacterized tissue        |
| Homo sapiens fetal liver (Stavrides GS) | uncharacterized tissue        |
| Homo sapiens adult heart (Stavrides GS) | uncharacterized tissue        |
| NIH_MGC_49                              | skin                          |
| NIH_MGC_45                              | kidney                        |
| NIH_MGC_43                              | eye                           |
| NIH_MGC_42                              | pancreas                      |
| HUVEC cDNA Library                      | uncharacterized tissue        |

| cDNA Library              | Designated Tissue for Library |
|---------------------------|-------------------------------|
| Human H2170 cDNA library  | uncharacterized tissue        |
| Human HBECII cDNA library | uncharacterized tissue        |
| AN0030                    | uncharacterized tissue        |
| AN0068                    | uncharacterized tissue        |
| BN0347                    | mammary gland                 |
| BN0368                    | mammary gland                 |
| BN0391                    | mammary gland                 |
| BT0814                    | mammary gland                 |
| BT0815                    | mammary gland                 |
| BT0841                    | mammary gland                 |
| CI0013                    | colon                         |
| CS0006                    | colon                         |
| CT0525                    | colon                         |
| CT0555                    | colon                         |
| CT0556                    | colon                         |
| MT0102                    | whole blood                   |
| MT0103                    | whole blood                   |
| MT0122                    | whole blood                   |
| MT0123                    | whole blood                   |
| NN0167                    | cerebrum                      |
| NN1130                    | cerebrum                      |
| NN1142                    | brain                         |
| NN1145                    | brain                         |
| NN1146                    | brain                         |
| NN1147                    | brain                         |
| NN1148                    | brain                         |
| NN1149                    | brain                         |
| NN1175                    | brain                         |
| GN0082                    | placenta                      |
| GN0088                    | placenta                      |
| GN0094                    | placenta                      |
| GN0101                    | placenta                      |
| GN0111                    | placenta                      |
| GN0112                    | placenta                      |
| GN0113                    | placenta                      |
| GN0120                    | placenta                      |
| GN0121                    | placenta                      |
| GN0122                    | placenta                      |
| GN0132                    | placenta                      |
| FT0029                    | prostate                      |

| cDNA Library                                                       | Designated Tissue for Library |
|--------------------------------------------------------------------|-------------------------------|
| FT0161                                                             | prostate                      |
| ST0310                                                             | stomach                       |
| TN0100                                                             | testis                        |
| TN0151                                                             | testis                        |
| TN0152                                                             | testis                        |
| SAGE_Duke_H1322                                                    | uncharacterized tissue        |
| UT0035                                                             | uterus                        |
| UT0048                                                             | uterus                        |
| UT0054                                                             | uterus                        |
| UT0080                                                             | uterus                        |
| UT0083                                                             | uterus                        |
| UT0084                                                             | uterus                        |
| UT0085                                                             | uterus                        |
| UT0086                                                             | uterus                        |
| UT0088                                                             | uterus                        |
| UT0092                                                             | uterus                        |
| UT0093                                                             | uterus                        |
| UT0096                                                             | uterus                        |
| human fetal brain neuroepithelium cDNA library                     | uncharacterized tissue        |
| Lupski_sciatic_nerve                                               | peripheral nervous system     |
| Lupski_sympathetic_trunk                                           | peripheral nervous system     |
| NIH_MGC_89                                                         | kidney                        |
| NIH_MGC_90                                                         | liver                         |
| NIH_MGC_91                                                         | prostate                      |
| NIH_MGC_92                                                         | testis                        |
| NIH_MGC_93                                                         | genitourinary                 |
| SAGE_Duke_H876                                                     | uncharacterized tissue        |
| Unstable Angina of AnZhen Hospital                                 | uncharacterized tissue        |
| Homo Sapiens cDNA Library from Peripheral White Blood Cell         | uncharacterized tissue        |
| Human Psoriasis Differential Display                               | uncharacterized tissue        |
| benign human mammary cell line library 123                         | uncharacterized tissue        |
| Differentially expressed cDNA library of Latent membrane protein 1 | uncharacterized tissue        |
| Homo sapiens CD4+ T-cell clone HA1.7                               | uncharacterized tissue        |
| normal human keratinocytes                                         | uncharacterized tissue        |
| microdissected normal human epidermis                              | skin                          |
| Human subtractive cDNA library                                     | uncharacterized tissue        |
| Homo sapiens library (Park SH)                                     | uncharacterized tissue        |
| Human Lens cDNA (Un-normalized, unamplified): BY                   | eye                           |
| Human Iris cDNA (Un-normalized, unamplified): BX                   | eye                           |
| Human hepatocellular carcinoma subtracted cDNA library             | uncharacterized tissue        |

| cDNA Library | Designated Tissue for Library |
|--------------|-------------------------------|
| KN0006       | uncharacterized tissue        |
| KT0009       | genitourinary                 |
| AN0080       | uncharacterized tissue        |
| KN0007       | uncharacterized tissue        |
| KT0001       | genitourinary                 |
| KT0002       | genitourinary                 |
| KT0003       | genitourinary                 |
| KT0004       | genitourinary                 |
| KT0005       | genitourinary                 |
| KT0006       | genitourinary                 |
| KT0007       | genitourinary                 |
| KT0008       | genitourinary                 |
| KT0012       | genitourinary                 |
| KT0013       | genitourinary                 |
| KT0014       | genitourinary                 |
| KT0015       | genitourinary                 |
| KT0016       | genitourinary                 |
| KT0017       | genitourinary                 |
| KT0018       | genitourinary                 |
| KT0019       | genitourinary                 |
| KT0023       | genitourinary                 |
| KT0025       | genitourinary                 |
| KT0030       | genitourinary                 |
| KT0031       | genitourinary                 |
| KT0033       | genitourinary                 |
| KT0035       | genitourinary                 |
| KT0036       | genitourinary                 |
| KT0037       | genitourinary                 |
| KT0038       | genitourinary                 |
| KT0039       | genitourinary                 |
| KT0040       | genitourinary                 |
| KT0041       | genitourinary                 |
| KT0042       | genitourinary                 |
| KT0043       | genitourinary                 |
| KT0044       | genitourinary                 |
| KT0045       | genitourinary                 |
| KT0046       | genitourinary                 |
| KT0048       | genitourinary                 |
| KT0050       | genitourinary                 |
| KT0051       | genitourinary                 |

| cDNA Library | Designated Tissue for Library |
|--------------|-------------------------------|
| KT0058       | genitourinary                 |
| KT0059       | genitourinary                 |
| HB0002       | thyroid                       |
| HB0004       | thyroid                       |
| HB0006       | thyroid                       |
| HB0007       | thyroid                       |
| HB0017       | thyroid                       |
| HB0026       | thyroid                       |
| HB0029       | thyroid                       |
| HB0031       | thyroid                       |
| HB0032       | thyroid                       |
| HB0033       | thyroid                       |
| HB0034       | thyroid                       |
| HB0035       | thyroid                       |
| HB0037       | thyroid                       |
| HB0038       | thyroid                       |
| BT0182       | mammary gland                 |
| BT0808       | mammary gland                 |
| BT0809       | mammary gland                 |
| BT0824       | mammary gland                 |
| BT0826       | mammary gland                 |
| BT0828       | mammary gland                 |
| BT0831       | mammary gland                 |
| BT0834       | mammary gland                 |
| BT0835       | mammary gland                 |
| BT0837       | mammary gland                 |
| BT0838       | mammary gland                 |
| BT0845       | mammary gland                 |
| BT0846       | mammary gland                 |
| BT0854       | mammary gland                 |
| BT0856       | mammary gland                 |
| BT0857       | mammary gland                 |
| BT0858       | mammary gland                 |
| BT0859       | mammary gland                 |
| BT0860       | mammary gland                 |
| BT0861       | mammary gland                 |
| BT0862       | mammary gland                 |
| BT0869       | mammary gland                 |
| BTN0409      | mammary gland                 |
| BN0381       | mammary gland                 |

| cDNA Library | Designated Tissue for Library |
|--------------|-------------------------------|
| BN0382       | mammary gland                 |
| BN0383       | mammary gland                 |
| BN0384       | mammary gland                 |
| BN0389       | mammary gland                 |
| BN0393       | mammary gland                 |
| BN0401       | mammary gland                 |
| BN0403       | mammary gland                 |
| BN0404       | mammary gland                 |
| BN0405       | mammary gland                 |
| BN0407       | mammary gland                 |
| BN0411       | mammary gland                 |
| BN0412       | mammary gland                 |
| BN0413       | mammary gland                 |
| BN0414       | mammary gland                 |
| BN0415       | mammary gland                 |
| BN0416       | mammary gland                 |
| BN0417       | mammary gland                 |
| BN0418       | mammary gland                 |
| BN0419       | mammary gland                 |
| BN0420       | mammary gland                 |
| BN0421       | mammary gland                 |
| BN0423       | mammary gland                 |
| BN0424       | mammary gland                 |
| BN0425       | mammary gland                 |
| BN0426       | mammary gland                 |
| BN0427       | mammary gland                 |
| BN0428       | mammary gland                 |
| BN0531       | mammary gland                 |
| BN0628       | mammary gland                 |
| CT0109       | colon                         |
| CT0123       | colon                         |
| CT0424       | colon                         |
| CT0453       | colon                         |
| CT0517       | colon                         |
| CT0537       | colon                         |
| CT0538       | colon                         |
| CT0539       | colon                         |
| CT0540       | colon                         |
| CT0541       | colon                         |
| CT0545       | colon                         |

| cDNA Library | Designated Tissue for Library |
|--------------|-------------------------------|
| CT0546       | colon                         |
| CT0547       | colon                         |
| CT0557       | colon                         |
| CT0559       | colon                         |
| CT0561       | colon                         |
| CT0562       | colon                         |
| CT0566       | colon                         |
| CT0570       | colon                         |
| CT0572       | colon                         |
| CT0574       | colon                         |
| CT0583       | colon                         |
| CT0586       | colon                         |
| CT0588       | colon                         |
| CT0589       | colon                         |
| CT0591       | colon                         |
| CT0592       | colon                         |
| CT0594       | colon                         |
| CT0595       | colon                         |
| CT0596       | colon                         |
| CT0597       | colon                         |
| CT0598       | colon                         |
| CT0599       | colon                         |
| CT0600       | colon                         |
| CT0601       | colon                         |
| CT0605       | colon                         |
| CT0606       | colon                         |
| CT0621       | colon                         |
| CT0628       | colon                         |
| CT0634       | colon                         |
| CT0637       | colon                         |
| CT0638       | colon                         |
| CT0641       | colon                         |
| CT0642       | colon                         |
| CT0644       | colon                         |
| CT0648       | colon                         |
| CT0649       | colon                         |
| CT0651       | colon                         |
| CT0652       | colon                         |
| CT0653       | colon                         |
| CT0654       | colon                         |

| cDNA Library | Designated Tissue for Library |
|--------------|-------------------------------|
| CT0685       | colon                         |
| CT3001       | colon                         |
| CT3002       | colon                         |
| CS0015       | colon                         |
| CS0016       | colon                         |
| CS0028       | colon                         |
| CS0031       | colon                         |
| CS0032       | colon                         |
| CS0033       | colon                         |
| CS0034       | colon                         |
| CS0036       | colon                         |
| CS0037       | colon                         |
| CS0038       | colon                         |
| CS0039       | colon                         |
| CS0040       | colon                         |
| CS0041       | colon                         |
| CS0042       | colon                         |
| CS0043       | colon                         |
| CS0044       | colon                         |
| CS0045       | colon                         |
| CS0046       | colon                         |
| CS0047       | colon                         |
| CS0048       | colon                         |
| CS0049       | colon                         |
| CS0050       | colon                         |
| CS0051       | colon                         |
| CS0052       | colon                         |
| CS0068       | colon                         |
| CS0071       | colon                         |
| CS0072       | colon                         |
| CS0073       | colon                         |
| CI0001       | colon                         |
| CI0003       | colon                         |
| CI0012       | colon                         |
| CI0023       | colon                         |
| CI0024       | colon                         |
| CI0029       | colon                         |
| CI0030       | colon                         |
| CI0031       | colon                         |
| CI0032       | colon                         |

| cDNA Library | Designated Tissue for Library |
|--------------|-------------------------------|
| CI0033       | colon                         |
| CI0035       | colon                         |
| CI0040       | colon                         |
| CI0042       | colon                         |
| CI0043       | colon                         |
| CI0044       | colon                         |
| CI0046       | colon                         |
| CI0047       | colon                         |
| CI0048       | colon                         |
| CI0049       | colon                         |
| CI0050       | colon                         |
| CI0051       | colon                         |
| CI0054       | colon                         |
| CI0055       | colon                         |
| CI0056       | colon                         |
| CI0057       | colon                         |
| CI0059       | colon                         |
| CI0060       | colon                         |
| CI0061       | colon                         |
| CI0062       | colon                         |
| CI0063       | colon                         |
| CI0064       | colon                         |
| CI0066       | colon                         |
| CI0075       | colon                         |
| CI0079       | colon                         |
| CI0080       | colon                         |
| CI0081       | colon                         |
| CI0082       | colon                         |
| CI0083       | colon                         |
| CI0084       | colon                         |
| CI0087       | colon                         |
| CI0088       | colon                         |
| CI0089       | colon                         |
| CI0090       | colon                         |
| CI0091       | colon                         |
| CI0092       | colon                         |
| CI0093       | colon                         |
| CI0094       | colon                         |
| CI0095       | colon                         |
| CI0096       | colon                         |

| cDNA Library | Designated Tissue for Library |
|--------------|-------------------------------|
| CI0098       | colon                         |
| CI0099       | colon                         |
| CI0100       | colon                         |
| CI0101       | colon                         |
| CI0102       | colon                         |
| CI0103       | colon                         |
| CI0105       | colon                         |
| CI0107       | colon                         |
| CI0108       | colon                         |
| CI0109       | colon                         |
| CI0110       | colon                         |
| CI0111       | colon                         |
| CI0112       | colon                         |
| CI0113       | colon                         |
| CI0114       | colon                         |
| CI0115       | colon                         |
| CI0116       | colon                         |
| CI0117       | colon                         |
| CI0118       | colon                         |
| CI0119       | colon                         |
| CI0120       | colon                         |
| CI0121       | colon                         |
| CI0122       | colon                         |
| CI0123       | colon                         |
| CI0127       | colon                         |
| CI0128       | colon                         |
| CI0130       | colon                         |
| CI0131       | colon                         |
| CI0132       | colon                         |
| CI0134       | colon                         |
| CI0135       | colon                         |
| CI0136       | colon                         |
| CI0137       | colon                         |
| CI0138       | colon                         |
| CI0139       | colon                         |
| CI0140       | colon                         |
| CI0141       | colon                         |
| CI0142       | colon                         |
| CI0143       | colon                         |
| CI0144       | colon                         |

| cDNA Library | Designated Tissue for Library |
|--------------|-------------------------------|
| CI0145       | colon                         |
| CI0146       | colon                         |
| CI0147       | colon                         |
| CI0148       | colon                         |
| CI0149       | colon                         |
| CI0150       | colon                         |
| CI0151       | colon                         |
| CI0152       | colon                         |
| CI0153       | colon                         |
| CI0154       | colon                         |
| CI0155       | colon                         |
| CI0156       | colon                         |
| CI0157       | colon                         |
| CI0158       | colon                         |
| CI0159       | colon                         |
| CI0160       | colon                         |
| CI0161       | colon                         |
| CI0162       | colon                         |
| CI0163       | colon                         |
| CI0165       | colon                         |
| CI0166       | colon                         |
| CI0167       | colon                         |
| CI0168       | colon                         |
| CI0170       | colon                         |
| CI0172       | colon                         |
| CI0173       | colon                         |
| CI0175       | colon                         |
| CI0177       | colon                         |
| CI0179       | colon                         |
| CI0180       | colon                         |
| CI0181       | colon                         |
| CI0182       | colon                         |
| CI0183       | colon                         |
| CI0184       | colon                         |
| CI0185       | colon                         |
| CI0186       | colon                         |
| CI0189       | colon                         |
| CI0190       | colon                         |
| CI0191       | colon                         |
| CI0193       | colon                         |

| cDNA Library | Designated Tissue for Library |
|--------------|-------------------------------|
| CI0194       | colon                         |
| CI0195       | colon                         |
| CI0196       | colon                         |
| CI0197       | colon                         |
| CI0198       | colon                         |
| CI0199       | colon                         |
| CI0200       | colon                         |
| CI0201       | colon                         |
| CI0415       | colon                         |
| CI0596       | colon                         |
| CN0060       | colon                         |
| CN0061       | colon                         |
| CN0076       | colon                         |
| CN0077       | colon                         |
| CN0078       | colon                         |
| CN0080       | colon                         |
| CN0081       | colon                         |
| CN0082       | colon                         |
| CN0083       | colon                         |
| CN0084       | colon                         |
| CN0085       | colon                         |
| CN0095       | colon                         |
| CN0096       | colon                         |
| CN0097       | colon                         |
| CN0098       | colon                         |
| CN0099       | colon                         |
| CN0104       | colon                         |
| CN0105       | colon                         |
| CN0109       | colon                         |
| CN0110       | colon                         |
| CN0112       | colon                         |
| IT0003       | genitourinary                 |
| IT0004       | genitourinary                 |
| IT0006       | genitourinary                 |
| IT0007       | genitourinary                 |
| IT0008       | genitourinary                 |
| IT0009       | genitourinary                 |
| IT0010       | genitourinary                 |
| IT0011       | genitourinary                 |
| IT0012       | genitourinary                 |

| cDNA Library | Designated Tissue for Library |
|--------------|-------------------------------|
| IT0013       | genitourinary                 |
| IT0014       | genitourinary                 |
| IT0015       | genitourinary                 |
| IT0018       | genitourinary                 |
| IT0019       | genitourinary                 |
| IT0021       | genitourinary                 |
| IT0022       | genitourinary                 |
| IT0023       | genitourinary                 |
| IT0024       | genitourinary                 |
| IT0025       | genitourinary                 |
| IT0026       | genitourinary                 |
| IT0027       | genitourinary                 |
| IT0028       | genitourinary                 |
| IT0029       | genitourinary                 |
| IT0031       | genitourinary                 |
| IT0032       | genitourinary                 |
| IT0033       | genitourinary                 |
| IT0037       | genitourinary                 |
| IT0038       | genitourinary                 |
| IT0039       | genitourinary                 |
| IT0041       | genitourinary                 |
| IT0042       | genitourinary                 |
| IT0043       | genitourinary                 |
| IT0044       | genitourinary                 |
| IT0045       | genitourinary                 |
| IT0046       | genitourinary                 |
| IT0047       | genitourinary                 |
| IT0048       | genitourinary                 |
| HT0043       | head and neck                 |
| HT01007      | head and neck                 |
| HT0610       | thyroid                       |
| HT0924       | head and neck                 |
| HT0959       | head and neck                 |
| HT0961       | head and neck                 |
| HT0962       | head and neck                 |
| HT0963       | head and neck                 |
| HT0964       | head and neck                 |
| HT0965       | head and neck                 |
| HT0966       | head and neck                 |
| HT0967       | head and neck                 |

| cDNA Library | Designated Tissue for Library |
|--------------|-------------------------------|
| HT0968       | head and neck                 |
| HT0969       | head and neck                 |
| HT0970       | head and neck                 |
| HT0973       | head and neck                 |
| HT0974       | head and neck                 |
| HT0975       | head and neck                 |
| HT0976       | head and neck                 |
| HT0977       | head and neck                 |
| HT0978       | head and neck                 |
| HT0979       | head and neck                 |
| HT0980       | head and neck                 |
| HT0981       | head and neck                 |
| HT0982       | head and neck                 |
| HT0983       | head and neck                 |
| HT0985       | head and neck                 |
| HT0986       | head and neck                 |
| HT0990       | head and neck                 |
| HT0993       | head and neck                 |
| HT0994       | head and neck                 |
| HT1002       | head and neck                 |
| HT1003       | head and neck                 |
| HT1007       | head and neck                 |
| HT1009       | head and neck                 |
| HT1010       | head and neck                 |
| HT1011       | head and neck                 |
| HT1012       | head and neck                 |
| HT1013       | head and neck                 |
| HT1014       | head and neck                 |
| HT1015       | head and neck                 |
| HT1016       | head and neck                 |
| HT1017       | head and neck                 |
| HT1018       | head and neck                 |
| HT1035       | thyroid                       |
| HT1036       | thyroid                       |
| HT1037       | thyroid                       |
| HT1038       | thyroid                       |
| HT1048       | thyroid                       |
| HT1055       | thyroid                       |
| HT1056       | thyroid                       |
| HT1057       | thyroid                       |

| cDNA Library | Designated Tissue for Library |
|--------------|-------------------------------|
| HT1058       | thyroid                       |
| HT1059       | thyroid                       |
| HT1060       | thyroid                       |
| HT1061       | thyroid                       |
| HT1062       | thyroid                       |
| HT1064       | thyroid                       |
| HT1065       | thyroid                       |
| HT1067       | thyroid                       |
| HT1068       | thyroid                       |
| HT1076       | thyroid                       |
| HT1077       | thyroid                       |
| HT1078       | thyroid                       |
| HT1079       | thyroid                       |
| HT1082       | thyroid                       |
| HT1085       | thyroid                       |
| HT1086       | thyroid                       |
| HT1090       | thyroid                       |
| HT1092       | thyroid                       |
| HT1106       | thyroid                       |
| HT1109       | thyroid                       |
| HT1110       | thyroid                       |
| HT1111       | thyroid                       |
| HT1127       | thyroid                       |
| HT1136       | head and neck                 |
| HT1138       | head and neck                 |
| HT1140       | head and neck                 |
| HT1145       | head and neck                 |
| HT1151       | head and neck                 |
| HT1152       | head and neck                 |
| HT1183       | thyroid                       |
| HT1184       | thyroid                       |
| HT1185       | thyroid                       |
| HT1188       | thyroid                       |
| HN0016       | head and neck                 |
| HN0019       | head and neck                 |
| HN0020       | head and neck                 |
| HN0021       | head and neck                 |
| HN0022       | head and neck                 |
| HN0023       | head and neck                 |
| HN0024       | head and neck                 |

| cDNA Library | Designated Tissue for Library |
|--------------|-------------------------------|
| HN0025       | head and neck                 |
| HN0027       | head and neck                 |
| HN0028       | head and neck                 |
| HN0029       | head and neck                 |
| HN0030       | head and neck                 |
| HN0031       | head and neck                 |
| HN0033       | thyroid                       |
| HN0034       | thyroid                       |
| HN0035       | pooled tissue                 |
| HN0036       | pooled tissue                 |
| HN0039       | thyroid                       |
| HN0042       | thyroid                       |
| HN0043       | thyroid                       |
| HN0047       | thyroid                       |
| HN0050       | thyroid                       |
| HN0052       | thyroid                       |
| HN0062       | thyroid                       |
| HN0063       | thyroid                       |
| HN0065       | thyroid                       |
| HN0066       | thyroid                       |
| HN0068       | thyroid                       |
| HN0069       | pooled tissue                 |
| HN0070       | thyroid                       |
| HN0071       | thyroid                       |
| HN0081       | thyroid                       |
| HN0082       | thyroid                       |
| HN0113       | thyroid                       |
| RT0001       | kidney                        |
| RT0006       | kidney                        |
| RT0007       | kidney                        |
| RT0008       | kidney                        |
| RT0009       | kidney                        |
| RT0010       | kidney                        |
| RT0011       | kidney                        |
| RT0012       | kidney                        |
| RT0015       | kidney                        |
| RT0017       | kidney                        |
| RT0018       | kidney                        |
| RT0019       | kidney                        |
| RT0020       | kidney                        |

| cDNA Library | Designated Tissue for Library |
|--------------|-------------------------------|
| RT0022       | kidney                        |
| RT0023       | kidney                        |
| RT0024       | kidney                        |
| RT0025       | kidney                        |
| RT0028       | kidney                        |
| RT0029       | kidney                        |
| RT0030       | kidney                        |
| RT0031       | kidney                        |
| RT0036       | kidney                        |
| RT0037       | kidney                        |
| RT0038       | kidney                        |
| RT0039       | kidney                        |
| RT0040       | kidney                        |
| RT0041       | kidney                        |
| RT0042       | kidney                        |
| RT0043       | kidney                        |
| RT0051       | kidney                        |
| RT0052       | kidney                        |
| RT0055       | kidney                        |
| RT0057       | kidney                        |
| RT0062       | kidney                        |
| RT0063       | kidney                        |
| RT0077       | kidney                        |
| RT0078       | kidney                        |
| RT0079       | kidney                        |
| RT0080       | kidney                        |
| EN0045       | lung                          |
| EN0046       | lung                          |
| EN0047       | lung                          |
| EN0048       | lung                          |
| EN0049       | lung                          |
| EN0051       | lung                          |
| EN0052       | lung                          |
| EN0053       | lung                          |
| EN0054       | lung                          |
| EN0055       | lung                          |
| EN0058       | lung                          |
| EN0059       | lung                          |
| EN0060       | lung                          |
| EN0061       | lung                          |

| cDNA Library | Designated Tissue for Library |
|--------------|-------------------------------|
| EN0063       | lung                          |
| EN0064       | lung                          |
| EN0065       | lung                          |
| EN0066       | lung                          |
| EN0067       | lung                          |
| EN0068       | lung                          |
| EN0071       | lung                          |
| EN0072       | lung                          |
| EN0073       | lung                          |
| EN0074       | lung                          |
| EN0075       | lung                          |
| EN0077       | lung                          |
| EN0078       | lung                          |
| EN0079       | lung                          |
| EN0080       | lung                          |
| EN0081       | lung                          |
| EN0083       | lung                          |
| EN0084       | lung                          |
| EN0085       | lung                          |
| EN0086       | lung                          |
| EN0087       | lung                          |
| EN0088       | lung                          |
| EN0089       | lung                          |
| EN0090       | lung                          |
| EN0091       | lung                          |
| EN0092       | lung                          |
| EN0093       | lung                          |
| EN0094       | lung                          |
| EN0095       | lung                          |
| EN0101       | lung                          |
| EN0102       | lung                          |
| EN0109       | lung                          |
| EN0111       | lung                          |
| EN0112       | lung                          |
| EN0132       | lung                          |
| EN0133       | lung                          |
| EN0194       | lung                          |
| ET0093       | lung                          |
| ET0094       | lung                          |
| ET0095       | lung                          |

| cDNA Library | Designated Tissue for Library |
|--------------|-------------------------------|
| ET0096       | lung                          |
| ET0097       | lung                          |
| ET0098       | lung                          |
| ET0099       | lung                          |
| ET0100       | lung                          |
| ET0101       | lung                          |
| ET0102       | lung                          |
| ET0103       | lung                          |
| ET0104       | lung                          |
| ET0105       | lung                          |
| ET0106       | lung                          |
| ET0107       | lung                          |
| ET0108       | lung                          |
| ET0109       | lung                          |
| ET0110       | lung                          |
| ET0111       | lung                          |
| ET0112       | lung                          |
| ET0113       | lung                          |
| ET0114       | lung                          |
| ET0115       | lung                          |
| ET0116       | lung                          |
| ET0117       | lung                          |
| ET0118       | lung                          |
| ET0119       | lung                          |
| ET0120       | lung                          |
| ET0121       | lung                          |
| ET0122       | lung                          |
| ET0123       | lung                          |
| ET0124       | lung                          |
| ET0125       | lung                          |
| ET0126       | lung                          |
| ET0127       | lung                          |
| ET0129       | lung                          |
| ET0130       | lung                          |
| ET0131       | lung                          |
| ET0132       | lung                          |
| ET0133       | lung                          |
| ET0134       | lung                          |
| ET0135       | lung                          |
| ET0136       | lung                          |

| cDNA Library | Designated Tissue for Library |
|--------------|-------------------------------|
| ET0144       | lung                          |
| ET0145       | lung                          |
| ET0146       | lung                          |
| ET0147       | lung                          |
| ET0148       | lung                          |
| ET0149       | lung                          |
| ET0150       | lung                          |
| ET0151       | lung                          |
| ET0152       | lung                          |
| ET0153       | lung                          |
| ET0154       | lung                          |
| ET0155       | lung                          |
| ET0163       | lung                          |
| ET0164       | lung                          |
| ET0171       | lung                          |
| ET0172       | lung                          |
| ET0173       | lung                          |
| ET0174       | lung                          |
| ET0175       | lung                          |
| ET0176       | lung                          |
| ET0177       | lung                          |
| ET0178       | lung                          |
| ET0180       | lung                          |
| ET0181       | lung                          |
| ET0183       | lung                          |
| ET0184       | lung                          |
| ET0185       | lung                          |
| ET0188       | lung                          |
| ET0191       | lung                          |
| ET0192       | lung                          |
| ET0193       | lung                          |
| ET0195       | lung                          |
| ET0196       | lung                          |
| ET0197       | lung                          |
| ET0198       | lung                          |
| ET0199       | lung                          |
| ET0200       | lung                          |
| ET0201       | lung                          |
| ET0202       | lung                          |
| ET0203       | lung                          |

| cDNA Library | Designated Tissue for Library |
|--------------|-------------------------------|
| ET0205       | lung                          |
| ET0207       | lung                          |
| ET0208       | lung                          |
| ET0209       | lung                          |
| ET0211       | lung                          |
| MT0128       | whole blood                   |
| MT0129       | whole blood                   |
| MT0130       | whole blood                   |
| MT0131       | whole blood                   |
| MT0132       | whole blood                   |
| MT0133       | whole blood                   |
| MT0134       | whole blood                   |
| MT0135       | whole blood                   |
| MT0136       | whole blood                   |
| MT0137       | whole blood                   |
| MT0138       | whole blood                   |
| MT0139       | whole blood                   |
| MT0140       | whole blood                   |
| MT0141       | whole blood                   |
| MT0142       | whole blood                   |
| MT0143       | whole blood                   |
| MT0144       | whole blood                   |
| MT0146       | whole blood                   |
| MT0147       | whole blood                   |
| MT0148       | whole blood                   |
| MT0149       | whole blood                   |
| MT0150       | whole blood                   |
| MT0151       | whole blood                   |
| MT0152       | whole blood                   |
| MT0154       | whole blood                   |
| MT0157       | whole blood                   |
| MT0158       | whole blood                   |
| MT0159       | whole blood                   |
| MT0160       | whole blood                   |
| MT0161       | whole blood                   |
| MT0162       | whole blood                   |
| MT0165       | whole blood                   |
| MT0166       | whole blood                   |
| MT0167       | whole blood                   |
| MT0168       | whole blood                   |

| cDNA Library | Designated Tissue for Library |
|--------------|-------------------------------|
| MT0170       | whole blood                   |
| MT0179       | whole blood                   |
| MT0180       | whole blood                   |
| MT0181       | whole blood                   |
| MT0185       | whole blood                   |
| MT0188       | whole blood                   |
| MT0189       | whole blood                   |
| MT0190       | whole blood                   |
| MT0191       | whole blood                   |
| MT0192       | whole blood                   |
| MT0193       | whole blood                   |
| MT0195       | whole blood                   |
| MT0198       | whole blood                   |
| MT0199       | whole blood                   |
| MT0200       | whole blood                   |
| MT0201       | whole blood                   |
| MT0203       | whole blood                   |
| MT0204       | whole blood                   |
| MT0205       | whole blood                   |
| MT0207       | whole blood                   |
| MT0208       | whole blood                   |
| MT0209       | whole blood                   |
| MT0210       | whole blood                   |
| MT0211       | whole blood                   |
| MT0212       | whole blood                   |
| MT0213       | whole blood                   |
| MT0214       | whole blood                   |
| MT0215       | whole blood                   |
| MT0217       | whole blood                   |
| MT0219       | whole blood                   |
| MT0220       | whole blood                   |
| MT0222       | whole blood                   |
| MT0223       | whole blood                   |
| MT0224       | whole blood                   |
| MT0225       | whole blood                   |
| MT0226       | whole blood                   |
| MT0227       | whole blood                   |
| MT0228       | whole blood                   |
| MT0229       | whole blood                   |
| MT0231       | whole blood                   |

| cDNA Library | Designated Tissue for Library |
|--------------|-------------------------------|
| MT0233       | whole blood                   |
| MT0234       | whole blood                   |
| MT0235       | whole blood                   |
| MT0238       | whole blood                   |
| MT0242       | whole blood                   |
| MT0244       | whole blood                   |
| MT0245       | whole blood                   |
| MT0256       | whole blood                   |
| MT0259       | whole blood                   |
| MT0267       | whole blood                   |
| MT0275       | whole blood                   |
| MT0281       | whole blood                   |
| MT0282       | whole blood                   |
| MT0283       | whole blood                   |
| MT0285       | whole blood                   |
| MT0309       | whole blood                   |
| MT0327       | whole blood                   |
| MT0328       | whole blood                   |
| MT0329       | whole blood                   |
| MT0330       | whole blood                   |
| NN0155       | cerebrum                      |
| NN0186       | cerebrum                      |
| NN0187       | cerebrum                      |
| NN0189       | cerebrum                      |
| NN0190       | cerebrum                      |
| NN0191       | cerebrum                      |
| NN0193       | cerebrum                      |
| NN0194       | cerebrum                      |
| NN0195       | cerebrum                      |
| NN0196       | cerebrum                      |
| NN0199       | cerebrum                      |
| NN0200       | cerebrum                      |
| NN0203       | cerebrum                      |
| NN0204       | cerebrum                      |
| NN0205       | cerebrum                      |
| NN0206       | cerebrum                      |
| NN0208       | cerebrum                      |
| NN0209       | cerebrum                      |
| NN0210       | cerebrum                      |
| NN0211       | cerebrum                      |

| cDNA Library | Designated Tissue for Library |
|--------------|-------------------------------|
| NN0212       | cerebrum                      |
| NN0213       | cerebrum                      |
| NN0214       | cerebrum                      |
| NN0215       | cerebrum                      |
| NN0216       | cerebrum                      |
| NN0217       | cerebrum                      |
| NN0218       | cerebrum                      |
| NN0219       | cerebrum                      |
| NN0220       | cerebrum                      |
| NN0221       | brain                         |
| NN0222       | brain                         |
| NN0223       | brain                         |
| NN0225       | brain                         |
| NN0226       | brain                         |
| NN0227       | brain                         |
| NN0228       | brain                         |
| NN0229       | brain                         |
| NN0230       | brain                         |
| NN0231       | brain                         |
| NN0232       | brain                         |
| NN0233       | brain                         |
| NN0234       | brain                         |
| NN0237       | brain                         |
| NN0238       | brain                         |
| NN0243       | brain                         |
| NN0244       | brain                         |
| NN0245       | brain                         |
| NN0246       | brain                         |
| NN0247       | brain                         |
| NN0248       | brain                         |
| NN0249       | brain                         |
| NN0250       | brain                         |
| NN0251       | brain                         |
| NN1081       | cerebrum                      |
| NN1152       | brain                         |
| NN1153       | brain                         |
| NN1154       | brain                         |
| NN1155       | brain                         |
| NN1156       | brain                         |
| NN1157       | brain                         |

| cDNA Library | Designated Tissue for Library |
|--------------|-------------------------------|
| NN1158       | brain                         |
| NN1161       | brain                         |
| NN1162       | brain                         |
| NN1163       | brain                         |
| NN1164       | brain                         |
| NN1165       | brain                         |
| NN1169       | brain                         |
| NN1170       | brain                         |
| NN1171       | brain                         |
| NN1172       | brain                         |
| NN1173       | brain                         |
| NN1174       | brain                         |
| NN1176       | brain                         |
| NN1177       | brain                         |
| NN1178       | brain                         |
| NN1179       | brain                         |
| NN1180       | brain                         |
| NN1182       | brain                         |
| NN1183       | brain                         |
| NN1184       | brain                         |
| NN1186       | brain                         |
| NN1187       | brain                         |
| NN1188       | brain                         |
| NN1189       | brain                         |
| NN1191       | brain                         |
| NN1193       | brain                         |
| NN1194       | brain                         |
| NN1195       | brain                         |
| NN1196       | brain                         |
| NN1198       | brain                         |
| NN1199       | brain                         |
| NN1200       | brain                         |
| NN1201       | brain                         |
| NN1202       | nervous                       |
| NN1203       | nervous                       |
| NN1204       | nervous                       |
| NN1205       | nervous                       |
| NN1207       | nervous                       |
| NN1209       | nervous                       |
| NN1210       | nervous                       |

| cDNA Library | Designated Tissue for Library |
|--------------|-------------------------------|
| NN1211       | nervous                       |
| NN1216       | nervous                       |
| NT0131       | brain                         |
| NT0132       | brain                         |
| NT0133       | brain                         |
| NT0135       | brain                         |
| NT0136       | brain                         |
| NT0137       | brain                         |
| NT0138       | brain                         |
| NT0139       | brain                         |
| NT0140       | brain                         |
| NT0141       | brain                         |
| NT0142       | brain                         |
| NT0143       | brain                         |
| NT0144       | brain                         |
| NT0146       | brain                         |
| NT0147       | brain                         |
| NT0148       | brain                         |
| NT0149       | brain                         |
| NT0150       | brain                         |
| NT0151       | brain                         |
| NT0152       | brain                         |
| NT0153       | brain                         |
| NT0154       | brain                         |
| NT0155       | brain                         |
| NT0156       | brain                         |
| NT0157       | brain                         |
| NT0158       | brain                         |
| NT0159       | brain                         |
| NT0162       | brain                         |
| NT0163       | brain                         |
| NT0164       | brain                         |
| NT0167       | brain                         |
| NT0168       | brain                         |
| NT0169       | brain                         |
| NT0170       | brain                         |
| NT0171       | brain                         |
| NT0175       | brain                         |
| NT0176       | brain                         |
| NT0177       | brain                         |

| cDNA Library | Designated Tissue for Library |
|--------------|-------------------------------|
| NT0178       | brain                         |
| NT0179       | brain                         |
| NT0180       | brain                         |
| NT0181       | brain                         |
| NT0182       | brain                         |
| NT0185       | brain                         |
| NT0186       | brain                         |
| NT0187       | brain                         |
| NT0189       | brain                         |
| NT0192       | brain                         |
| NT0193       | brain                         |
| NT0194       | brain                         |
| NT0196       | brain                         |
| NT0197       | brain                         |
| NT0198       | brain                         |
| NT0199       | brain                         |
| NT0200       | brain                         |
| NT0201       | brain                         |
| NT0202       | brain                         |
| NT0203       | brain                         |
| NT0204       | brain                         |
| NT0209       | brain                         |
| NT0210       | brain                         |
| NT0211       | brain                         |
| NT0213       | brain                         |
| NT0214       | brain                         |
| NT0215       | brain                         |
| NT0216       | brain                         |
| NT0217       | brain                         |
| NT0221       | brain                         |
| NT0225       | brain                         |
| NT0226       | brain                         |
| NT0227       | brain                         |
| NT0228       | brain                         |
| NT0229       | brain                         |
| NT0230       | brain                         |
| NT0232       | brain                         |
| NT0235       | brain                         |
| NT0236       | brain                         |
| NT0237       | brain                         |

| cDNA Library | Designated Tissue for Library |
|--------------|-------------------------------|
| NT0239       | brain                         |
| NT0242       | brain                         |
| NT0243       | brain                         |
| NT0244       | brain                         |
| NT0245       | brain                         |
| NT0246       | brain                         |
| NT0247       | brain                         |
| NT0248       | brain                         |
| NT0249       | brain                         |
| NT0250       | brain                         |
| NT0251       | brain                         |
| NT0252       | brain                         |
| NT0256       | brain                         |
| NT0257       | brain                         |
| NT0270       | brain                         |
| NT0271       | brain                         |
| NT0273       | brain                         |
| NT0284       | brain                         |
| NT0289       | brain                         |
| NT0299       | brain                         |
| NT1006       | brain                         |
| OT0123       | ovary                         |
| GN0026       | placenta                      |
| GN0066       | placenta                      |
| GN0068       | placenta                      |
| GN0093       | placenta                      |
| GN0097       | placenta                      |
| GN0099       | placenta                      |
| GN0100       | placenta                      |
| GN0102       | placenta                      |
| GN0103       | placenta                      |
| GN0104       | placenta                      |
| GN0107       | placenta                      |
| GN0108       | placenta                      |
| GN0109       | placenta                      |
| GN0110       | placenta                      |
| GN0123       | placenta                      |
| GN0126       | placenta                      |
| GN0127       | placenta                      |
| GN0131       | placenta                      |

| cDNA Library | Designated Tissue for Library |
|--------------|-------------------------------|
| GN0133       | placenta                      |
| GN0134       | placenta                      |
| GN0135       | placenta                      |
| GN0136       | placenta                      |
| GN0137       | placenta                      |
| GN0138       | placenta                      |
| GN0139       | placenta                      |
| GN0140       | placenta                      |
| GN0141       | placenta                      |
| GN0143       | placenta                      |
| GN0144       | placenta                      |
| GN0149       | placenta                      |
| GN0150       | placenta                      |
| GN0151       | placenta                      |
| GN0152       | placenta                      |
| GN0153       | placenta                      |
| GN0154       | placenta                      |
| GN0157       | placenta                      |
| GN0158       | placenta                      |
| GN0160       | placenta                      |
| GN0161       | placenta                      |
| GN0162       | placenta                      |
| GN0163       | placenta                      |
| GN0164       | placenta                      |
| GN0165       | placenta                      |
| GN0166       | placenta                      |
| GN0167       | placenta                      |
| GN0171       | placenta                      |
| GN0172       | placenta                      |
| GN0173       | placenta                      |
| GN0176       | placenta                      |
| GN0177       | placenta                      |
| GN0178       | placenta                      |
| GN0179       | placenta                      |
| GN0180       | placenta                      |
| GN0182       | placenta                      |
| GN0183       | placenta                      |
| GN0184       | placenta                      |
| GN0185       | placenta                      |
| GN0186       | placenta                      |

| cDNA Library | Designated Tissue for Library |
|--------------|-------------------------------|
| GN0187       | placenta                      |
| GN0188       | placenta                      |
| GN0189       | placenta                      |
| GN0190       | placenta                      |
| GN0191       | placenta                      |
| GN0192       | placenta                      |
| GN0193       | placenta                      |
| GN0194       | placenta                      |
| GN0195       | placenta                      |
| GN0196       | placenta                      |
| GN0197       | placenta                      |
| GN0198       | placenta                      |
| GN0199       | placenta                      |
| GN0200       | placenta                      |
| GN0201       | placenta                      |
| GN0202       | placenta                      |
| GN0203       | placenta                      |
| GN0204       | placenta                      |
| GN0205       | placenta                      |
| GN0206       | placenta                      |
| GN0207       | placenta                      |
| GN0208       | placenta                      |
| GN0209       | placenta                      |
| GN0210       | placenta                      |
| GN0211       | placenta                      |
| GN0212       | placenta                      |
| GN0213       | placenta                      |
| GN0214       | placenta                      |
| GN0215       | placenta                      |
| GN0216       | placenta                      |
| GN0217       | placenta                      |
| GN0220       | placenta                      |
| GN0221       | placenta                      |
| GN0227       | placenta                      |
| GN0229       | placenta                      |
| GN0230       | placenta                      |
| GN0231       | placenta                      |
| GN0235       | placenta                      |
| GN0236       | placenta                      |
| GN0238       | placenta                      |

| cDNA Library | Designated Tissue for Library |
|--------------|-------------------------------|
| GN0239       | placenta                      |
| GN0240       | placenta                      |
| GN0241       | placenta                      |
| GN0246       | placenta                      |
| GN0247       | placenta                      |
| GN0248       | placenta                      |
| GN0249       | placenta                      |
| GN0250       | placenta                      |
| GN0253       | placenta                      |
| GN0257       | placenta                      |
| GN0264       | placenta                      |
| GN0268       | placenta                      |
| GN0269       | placenta                      |
| GN0270       | placenta                      |
| GN0271       | placenta                      |
| GN0272       | placenta                      |
| GN0273       | placenta                      |
| GN0274       | placenta                      |
| GN0276       | placenta                      |
| GN0280       | placenta                      |
| GN0283       | placenta                      |
| GN0284       | placenta                      |
| GN0287       | placenta                      |
| GN0290       | placenta                      |
| GN0291       | placenta                      |
| GN0296       | placenta                      |
| GN0297       | placenta                      |
| GN0298       | placenta                      |
| GN0300       | placenta                      |
| GN0301       | placenta                      |
| GN0302       | placenta                      |
| GN0303       | placenta                      |
| GN0304       | placenta                      |
| GN0305       | placenta                      |
| GN0306       | placenta                      |
| GN0307       | placenta                      |
| GN0309       | placenta                      |
| GN0310       | placenta                      |
| GN0311       | placenta                      |
| GN0314       | placenta                      |

| cDNA Library | Designated Tissue for Library |
|--------------|-------------------------------|
| GN0315       | placenta                      |
| GN0317       | placenta                      |
| GN0319       | placenta                      |
| GN0320       | placenta                      |
| GN0321       | placenta                      |
| GN0323       | placenta                      |
| GN0324       | placenta                      |
| GN0326       | placenta                      |
| GN0327       | placenta                      |
| GN0332       | placenta                      |
| GN0333       | placenta                      |
| GN0335       | placenta                      |
| GN0336       | placenta                      |
| GN0340       | placenta                      |
| GN0344       | placenta                      |
| GN0353       | placenta                      |
| GN0354       | placenta                      |
| GN0356       | placenta                      |
| GN0357       | placenta                      |
| GN0359       | placenta                      |
| GN0361       | placenta                      |
| GN0362       | placenta                      |
| GN0363       | placenta                      |
| GN0364       | placenta                      |
| GN0366       | placenta                      |
| GN0380       | placenta                      |
| GN0385       | placenta                      |
| GN0392       | placenta                      |
| GN0393       | placenta                      |
| GT0691       | placenta                      |
| FN0082       | prostate                      |
| FN0193       | prostate                      |
| FN0194       | prostate                      |
| FN0195       | prostate                      |
| FN0197       | prostate                      |
| FN0198       | prostate                      |
| FN0200       | prostate                      |
| FN0201       | prostate                      |
| FN0202       | prostate                      |
| FN0203       | prostate                      |

| cDNA Library | Designated Tissue for Library |
|--------------|-------------------------------|
| FN0204       | prostate                      |
| FN0210       | prostate                      |
| FN0211       | prostate                      |
| FN0212       | prostate                      |
| FN0213       | prostate                      |
| FT0183       | prostate                      |
| FT0184       | prostate                      |
| FT0190       | prostate                      |
| FT0191       | prostate                      |
| FT0192       | prostate                      |
| FT0193       | prostate                      |
| FT0194       | prostate                      |
| FT0195       | prostate                      |
| FT0199       | prostate                      |
| FT0200       | prostate                      |
| FT0201       | prostate                      |
| FT0202       | prostate                      |
| FT0203       | prostate                      |
| FT0204       | prostate                      |
| FT0205       | prostate                      |
| FT0207       | prostate                      |
| FT0208       | prostate                      |
| FT0209       | prostate                      |
| FT0210       | prostate                      |
| FT0211       | prostate                      |
| FT0212       | prostate                      |
| TN0105       | testis                        |
| TN0116       | testis                        |
| TN0134       | testis                        |
| TN0142       | testis                        |
| TN0146       | testis                        |
| TN0147       | testis                        |
| TN0164       | testis                        |
| TN0166       | testis                        |
| TN0167       | testis                        |
| TN0168       | testis                        |
| TN0170       | testis                        |
| TN0171       | testis                        |
| TN0173       | testis                        |
| TN0174       | testis                        |

| cDNA Library                                      | Designated Tissue for Library |
|---------------------------------------------------|-------------------------------|
| TN0175                                            | testis                        |
| TN0176                                            | testis                        |
| TN0177                                            | testis                        |
| TN0178                                            | testis                        |
| TN0179                                            | testis                        |
| TN0181                                            | testis                        |
| TN0182                                            | testis                        |
| TN0196                                            | testis                        |
| UT0049                                            | uterus                        |
| UT0051                                            | uterus                        |
| UT0089                                            | uterus                        |
| UT0090                                            | uterus                        |
| UT0094                                            | uterus                        |
| UT0095                                            | uterus                        |
| UT0097                                            | uterus                        |
| UT0098                                            | uterus                        |
| UT0099                                            | uterus                        |
| UT0101                                            | uterus                        |
| UT0102                                            | uterus                        |
| UT0103                                            | uterus                        |
| UT0104                                            | uterus                        |
| UT0105                                            | uterus                        |
| UT0106                                            | uterus                        |
| UT0108                                            | uterus                        |
| UT0109                                            | uterus                        |
| UT0112                                            | uterus                        |
| UT0113                                            | uterus                        |
| UT0114                                            | uterus                        |
| UT0115                                            | uterus                        |
| UT0127                                            | uterus                        |
| UT0129                                            | uterus                        |
| Homo sapiens paratumor gastric mucosa             | uncharacterized tissue        |
| human CD15+ myeloid progenitor cells cDNA Library | uncharacterized tissue        |
| Homo sapiens HeLa (Suzuki,T.)                     | uncharacterized tissue        |
| NCI_CGAP_Sub9                                     | uncharacterized tissue        |
| Human Retinal Pigment Epithelium cDNA             | retina                        |
| Melton Human Islets HIZ1                          | pancreatic islet              |
| SAGE_Meso-12                                      | soft tissue                   |
| Saos-2 cDNA library                               | uncharacterized tissue        |
| 4-week-old human embryo cDNA library              | uncharacterized tissue        |

| cDNA Library                                                      | Designated Tissue for Library |
|-------------------------------------------------------------------|-------------------------------|
| Athersys RAGE Library                                             | uncharacterized tissue        |
| SAGE_Duke_H484                                                    | uncharacterized tissue        |
| SAGE_Duke_C609                                                    | uncharacterized tissue        |
| NIH_MGC_40                                                        | prostate                      |
| NIH_MGC_41                                                        | skin                          |
| LTI_NFL006_PL2                                                    | placenta                      |
| LTI_FL015_Brn1                                                    | brain                         |
| LTI_NFL008_TC2                                                    | uncharacterized tissue        |
| LTI_NFL010_BC2                                                    | uncharacterized tissue        |
| SAGE_Duke_Kidney                                                  | kidney                        |
| Human THP1 cell line library                                      | uncharacterized tissue        |
| Human carcinoma of esophagus                                      | uncharacterized tissue        |
| Human Keratinocyte Subtraction Library- Downregulated Transcripts | skin                          |
| Homo sapiens SiHa                                                 | uncharacterized tissue        |
| Homo sapiens atherosclerosis related cDNA library                 | uncharacterized tissue        |
| NIH_MGC_47                                                        | brain                         |
| NCI_CGAP_Skn3                                                     | skin                          |
| NCI_CGAP_Skn4                                                     | skin                          |
| SAGE_Duke_96-04-P019                                              | brain                         |
| Human placenta cDNA expression library                            | uncharacterized tissue        |
| Human cDNA expression libraries                                   | uncharacterized tissue        |
| Human transformed 16HBE cDNA                                      | uncharacterized tissue        |
| 451 (synonym: hlcc1) spinal cord                                  | nervous                       |
| Human esophageal carcinoma subtracted cDNA library                | uncharacterized tissue        |
| Human esophageal carcinoma cDNA library                           | uncharacterized tissue        |
| Homo sapiens brain (H Wang)                                       | uncharacterized tissue        |
| FIBHAVI                                                           | uncharacterized tissue        |
| Human nasopharynx subtractive cDNA Library                        | uncharacterized tissue        |
| SAGE_Duke_98-04-P494                                              | cerebellum                    |
| Human Genome Express Library                                      | uncharacterized tissue        |
| SKBR3 Lambda Zap Express Library (ATCC#HTB-30)                    | uncharacterized tissue        |
| Homo sapiens liver fetal (Kishimoto,T.)                           | uncharacterized tissue        |
| Dimethylfumarate induced differential expression in U937 cells    | uncharacterized tissue        |
| human uterine leiomyoma subtractive library                       | uncharacterized tissue        |
| Sugano Homo sapiens cDNA library                                  | uncharacterized tissue        |
| NIH_MGC_106                                                       | uncharacterized tissue        |
| NIH_MGC_113                                                       | spleen                        |
| SAGE_Duke_H1126                                                   | brain                         |
| SSH-HCA-D library                                                 | uncharacterized tissue        |
| SSH-HCA-U library                                                 | uncharacterized tissue        |

| cDNA Library                                         | Designated Tissue for Library |
|------------------------------------------------------|-------------------------------|
| Human lymphocytes                                    | uncharacterized tissue        |
| Human HIV associated B-cell centroblastic lymphoma   | uncharacterized tissue        |
| human activated B lymphocyte                         | uncharacterized tissue        |
| Breast Cells Differential Display ARE-cDNA PCR       | uncharacterized tissue        |
| THP-1 Differential Display ARE-cDNA PCR              | uncharacterized tissue        |
| Kidney Cells Differential Display ARE-cDNA PCR       | uncharacterized tissue        |
| Monocytes Differential Display ARE-cDNA PCR          | uncharacterized tissue        |
| SAGE_gastric_cancer_xenograft_X101                   | stomach                       |
| SAGE_Duke_98-05-P608                                 | brain                         |
| SAGE_gastric_cancer-G234                             | stomach                       |
| Human rhabdomyosarcoma cDNA Library                  | uncharacterized tissue        |
| HR85 islet                                           | pancreatic islet              |
| ciliated epithelial cDNA cell library                | uncharacterized tissue        |
| SAGE_Duke_leukocyte                                  | whole blood                   |
| SAGE_Duke_97-05-P015                                 | brain                         |
| SAGE_normal_lung                                     | lung                          |
| Homo sapiens differential display (Yong LL)          | uncharacterized tissue        |
| SAGE_ependymoblastoma_819                            | brain                         |
| Homo sapiens lung squamous cell carcinoma            | uncharacterized tissue        |
| SAGE_breast_myoepithelial                            | mammary gland                 |
| SAGE_breast_hyperplasia                              | mammary gland                 |
| HOA (Human Osteoarthritic Cartilage)                 | uncharacterized tissue        |
| SAGE_OC14                                            | ovary                         |
| NIH_MGC_98                                           | brain                         |
| HNC (Human Normal Cartilage)                         | uncharacterized tissue        |
| Human Fetal cDNA Library                             | uncharacterized tissue        |
| NIH_MGC_99                                           | uncharacterized tissue        |
| NIH_MGC_100                                          | liver                         |
| Homo sapiens hepatocellular carcinoma                | uncharacterized tissue        |
| Proliferating Human Erythroid Cells (LCB:ax library) | whole blood                   |
| BT0394                                               | uncharacterized tissue        |
| BT0829                                               | uncharacterized tissue        |
| CN0062                                               | uncharacterized tissue        |
| CN0063                                               | uncharacterized tissue        |
| CN0065                                               | colon                         |
| CN0067                                               | uncharacterized tissue        |
| CN0068                                               | colon                         |
| CN0089                                               | colon                         |
| CN0090                                               | uncharacterized tissue        |
| CN0091                                               | uncharacterized tissue        |

| cDNA Library | Designated Tissue for Library |
|--------------|-------------------------------|
| CN0092       | uncharacterized tissue        |
| CN0093       | uncharacterized tissue        |
| CN0094       | uncharacterized tissue        |
| CN0100       | uncharacterized tissue        |
| CN0101       | uncharacterized tissue        |
| CN0114       | uncharacterized tissue        |
| CN0115       | uncharacterized tissue        |
| CN0120       | uncharacterized tissue        |
| CN0129       | uncharacterized tissue        |
| CN0136       | uncharacterized tissue        |
| CN0137       | uncharacterized tissue        |
| CN0138       | uncharacterized tissue        |
| CN0147       | colon                         |
| CN0150       | colon                         |
| CN0151       | uncharacterized tissue        |
| CN0153       | uncharacterized tissue        |
| CN0155       | colon                         |
| CN0156       | uncharacterized tissue        |
| CN0159       | uncharacterized tissue        |
| CN0160       | uncharacterized tissue        |
| CN0161       | uncharacterized tissue        |
| CN0162       | uncharacterized tissue        |
| CN0164       | uncharacterized tissue        |
| CN0165       | uncharacterized tissue        |
| CN0173       | uncharacterized tissue        |
| CN0174       | uncharacterized tissue        |
| CN0344       | uncharacterized tissue        |
| CN0513       | uncharacterized tissue        |
| CN0612       | uncharacterized tissue        |
| CT0372       | uncharacterized tissue        |
| CT0377       | uncharacterized tissue        |
| CT0602       | uncharacterized tissue        |
| CT0603       | uncharacterized tissue        |
| CT0607       | uncharacterized tissue        |
| CT0608       | uncharacterized tissue        |
| CT0616       | uncharacterized tissue        |
| CT0618       | uncharacterized tissue        |
| CT0623       | uncharacterized tissue        |
| CT0624       | uncharacterized tissue        |
| CT0625       | uncharacterized tissue        |

| cDNA Library | Designated Tissue for Library |
|--------------|-------------------------------|
| CT0626       | uncharacterized tissue        |
| CT0627       | uncharacterized tissue        |
| CT0629       | colon                         |
| CT0631       | uncharacterized tissue        |
| CT0635       | uncharacterized tissue        |
| CT0639       | uncharacterized tissue        |
| CT0640       | uncharacterized tissue        |
| CT0643       | uncharacterized tissue        |
| CT0645       | uncharacterized tissue        |
| CT0655       | uncharacterized tissue        |
| CT0656       | colon                         |
| CT0657       | uncharacterized tissue        |
| CT0658       | colon                         |
| CT0659       | uncharacterized tissue        |
| CT0660       | uncharacterized tissue        |
| CT0661       | uncharacterized tissue        |
| CT0662       | uncharacterized tissue        |
| CT0663       | uncharacterized tissue        |
| CT0664       | uncharacterized tissue        |
| CT0669       | uncharacterized tissue        |
| CT0674       | colon                         |
| CT0676       | uncharacterized tissue        |
| CT0683       | uncharacterized tissue        |
| CT0691       | uncharacterized tissue        |
| CT0692       | uncharacterized tissue        |
| CT0695       | uncharacterized tissue        |
| CT0697       | uncharacterized tissue        |
| CT0709       | uncharacterized tissue        |
| CT0710       | uncharacterized tissue        |
| CT0711       | uncharacterized tissue        |
| CT0714       | uncharacterized tissue        |
| CT0715       | uncharacterized tissue        |
| CT0716       | uncharacterized tissue        |
| CT0730       | uncharacterized tissue        |
| CT0731       | uncharacterized tissue        |
| CT0732       | uncharacterized tissue        |
| CT0734       | uncharacterized tissue        |
| CT0735       | uncharacterized tissue        |
| CT0736       | uncharacterized tissue        |
| CT0737       | uncharacterized tissue        |

| cDNA Library | Designated Tissue for Library |
|--------------|-------------------------------|
| CT0741       | uncharacterized tissue        |
| CT0743       | uncharacterized tissue        |
| CT0744       | uncharacterized tissue        |
| CT0748       | uncharacterized tissue        |
| CT0749       | uncharacterized tissue        |
| CT0753       | uncharacterized tissue        |
| CT0754       | uncharacterized tissue        |
| CT0772       | uncharacterized tissue        |
| CT0779       | uncharacterized tissue        |
| CT0780       | uncharacterized tissue        |
| CT0781       | uncharacterized tissue        |
| CT0782       | uncharacterized tissue        |
| CT0783       | uncharacterized tissue        |
| CT0793       | uncharacterized tissue        |
| CT0794       | uncharacterized tissue        |
| CT0795       | uncharacterized tissue        |
| CT0798       | uncharacterized tissue        |
| CT0799       | uncharacterized tissue        |
| CT0800       | uncharacterized tissue        |
| CT0801       | colon                         |
| CT0802       | colon                         |
| CT0803       | uncharacterized tissue        |
| CT0804       | colon                         |
| CT0805       | uncharacterized tissue        |
| CT0806       | colon                         |
| CT0807       | uncharacterized tissue        |
| CT0808       | uncharacterized tissue        |
| CT0809       | uncharacterized tissue        |
| CT0810       | uncharacterized tissue        |
| CT0811       | uncharacterized tissue        |
| CT0813       | uncharacterized tissue        |
| CT0814       | uncharacterized tissue        |
| CT0815       | uncharacterized tissue        |
| CT0817       | uncharacterized tissue        |
| CT0818       | uncharacterized tissue        |
| CT0819       | uncharacterized tissue        |
| CT0824       | uncharacterized tissue        |
| EN0096       | lung                          |
| EN0097       | uncharacterized tissue        |
| EN0098       | lung                          |

| cDNA Library | Designated Tissue for Library |
|--------------|-------------------------------|
| EN0100       | uncharacterized tissue        |
| ET0138       | lung                          |
| ET0139       | uncharacterized tissue        |
| ET0140       | lung                          |
| ET0141       | uncharacterized tissue        |
| ET0142       | uncharacterized tissue        |
| ET0206       | uncharacterized tissue        |
| ET0226       | uncharacterized tissue        |
| ET0227       | uncharacterized tissue        |
| ET0237       | uncharacterized tissue        |
| ET0245       | uncharacterized tissue        |
| ET0251       | uncharacterized tissue        |
| ET0254       | uncharacterized tissue        |
| ET0255       | uncharacterized tissue        |
| ET0256       | lung                          |
| ET0257       | uncharacterized tissue        |
| ET0258       | uncharacterized tissue        |
| ET0259       | uncharacterized tissue        |
| ET0260       | uncharacterized tissue        |
| ET0262       | lung                          |
| ET0266       | uncharacterized tissue        |
| ET0268       | lung                          |
| ET0272       | lung                          |
| ET0273       | uncharacterized tissue        |
| ET0274       | uncharacterized tissue        |
| ET0277       | lung                          |
| ET0675       | uncharacterized tissue        |
| FN0206       | prostate                      |
| FN0209       | prostate                      |
| FN0214       | uncharacterized tissue        |
| FT0186       | uncharacterized tissue        |
| FT0206       | uncharacterized tissue        |
| GN0170       | uncharacterized tissue        |
| GN0175       | placenta                      |
| GN0233       | uncharacterized tissue        |
| GN0275       | uncharacterized tissue        |
| GN0277       | uncharacterized tissue        |
| GN0281       | uncharacterized tissue        |
| GN0282       | uncharacterized tissue        |
| GN0288       | uncharacterized tissue        |

| cDNA Library | Designated Tissue for Library |
|--------------|-------------------------------|
| GN0289       | uncharacterized tissue        |
| GN0294       | placenta                      |
| GN0295       | uncharacterized tissue        |
| GN0313       | uncharacterized tissue        |
| GN0328       | uncharacterized tissue        |
| GN0329       | uncharacterized tissue        |
| GN0330       | uncharacterized tissue        |
| GN0334       | uncharacterized tissue        |
| GN0337       | uncharacterized tissue        |
| GN0338       | uncharacterized tissue        |
| GN0339       | uncharacterized tissue        |
| GN0345       | uncharacterized tissue        |
| GN0348       | uncharacterized tissue        |
| GN0349       | uncharacterized tissue        |
| GN0351       | uncharacterized tissue        |
| GN0365       | uncharacterized tissue        |
| GN0367       | uncharacterized tissue        |
| GN0374       | uncharacterized tissue        |
| GN0375       | placenta                      |
| GN0376       | uncharacterized tissue        |
| GN0405       | uncharacterized tissue        |
| GN0406       | uncharacterized tissue        |
| GN0407       | uncharacterized tissue        |
| GN0408       | uncharacterized tissue        |
| GN0410       | uncharacterized tissue        |
| GN0411       | uncharacterized tissue        |
| GN0412       | uncharacterized tissue        |
| GN0428       | uncharacterized tissue        |
| GN0429       | uncharacterized tissue        |
| GN0430       | uncharacterized tissue        |
| GN0431       | uncharacterized tissue        |
| GN0432       | uncharacterized tissue        |
| GN0434       | uncharacterized tissue        |
| GN0437       | uncharacterized tissue        |
| GN0446       | uncharacterized tissue        |
| GN0461       | uncharacterized tissue        |
| GN0468       | uncharacterized tissue        |
| GN0470       | uncharacterized tissue        |
| GN0471       | uncharacterized tissue        |
| GN0473       | uncharacterized tissue        |

| cDNA Library | Designated Tissue for Library |
|--------------|-------------------------------|
| GN0474       | uncharacterized tissue        |
| GN0486       | uncharacterized tissue        |
| GN0488       | uncharacterized tissue        |
| GN0493       | uncharacterized tissue        |
| GN0494       | uncharacterized tissue        |
| GN0495       | uncharacterized tissue        |
| GN0496       | uncharacterized tissue        |
| GN0497       | placenta                      |
| GN0498       | uncharacterized tissue        |
| GN0499       | uncharacterized tissue        |
| GN0500       | uncharacterized tissue        |
| GN0501       | uncharacterized tissue        |
| GN0502       | uncharacterized tissue        |
| GN0506       | uncharacterized tissue        |
| GN0511       | placenta                      |
| GN0513       | placenta                      |
| GN0516       | placenta                      |
| HN0045       | thyroid                       |
| HN0046       | thyroid                       |
| HN0049       | thyroid                       |
| HN0053       | thyroid                       |
| HN0054       | pooled tissue                 |
| HN0055       | thyroid                       |
| HN0056       | thyroid                       |
| HN0057       | thyroid                       |
| HN0058       | thyroid                       |
| HN0060       | thyroid                       |
| HN0061       | thyroid                       |
| HN0073       | pooled tissue                 |
| HN0074       | thyroid                       |
| HN0075       | thyroid                       |
| HN0076       | pooled tissue                 |
| HN0077       | thyroid                       |
| HN0078       | pooled tissue                 |
| HN0079       | pooled tissue                 |
| HN0083       | thyroid                       |
| HN0114       | thyroid                       |
| HN0123       | thyroid                       |
| HN0124       | thyroid                       |
| HN0125       | thyroid                       |

| cDNA Library | Designated Tissue for Library |
|--------------|-------------------------------|
| HN0126       | thyroid                       |
| HN0127       | thyroid                       |
| HN0132       | thyroid                       |
| HN0135       | thyroid                       |
| HN0145       | thyroid                       |
| HN0148       | thyroid                       |
| HN0149       | thyroid                       |
| HN0150       | pooled tissue                 |
| HN0151       | thyroid                       |
| HN0152       | thyroid                       |
| HN0153       | thyroid                       |
| HN0157       | thyroid                       |
| HN0158       | thyroid                       |
| HN0159       | thyroid                       |
| HN0160       | thyroid                       |
| HN0161       | thyroid                       |
| HN0163       | thyroid                       |
| HN0164       | thyroid                       |
| HN0166       | thyroid                       |
| HN0175       | thyroid                       |
| HN0177       | thyroid                       |
| HN0179       | thyroid                       |
| HN0183       | thyroid                       |
| HN0184       | thyroid                       |
| HN0185       | thyroid                       |
| HN0188       | thyroid                       |
| HN0190       | thyroid                       |
| HN0203       | thyroid                       |
| HN0205       | thyroid                       |
| HN0206       | thyroid                       |
| HN0209       | thyroid                       |
| HT0972       | head and neck                 |
| HT0996       | head and neck                 |
| HT0999       | head and neck                 |
| HT1032       | thyroid                       |
| HT1033       | thyroid                       |
| HT1039       | thyroid                       |
| HT1050       | thyroid                       |
| HT1051       | thyroid                       |
| HT1052       | thyroid                       |

| cDNA Library | Designated Tissue for Library |
|--------------|-------------------------------|
| HT1075       | thyroid                       |
| HT1087       | thyroid                       |
| HT1088       | thyroid                       |
| HT1091       | thyroid                       |
| HT1093       | thyroid                       |
| HT1100       | thyroid                       |
| HT1104       | thyroid                       |
| HT1132       | head and neck                 |
| HT1141       | head and neck                 |
| HT1144       | head and neck                 |
| HT1146       | head and neck                 |
| HT1150       | head and neck                 |
| HT1155       | head and neck                 |
| HT1160       | head and neck                 |
| HT1161       | head and neck                 |
| HT1162       | head and neck                 |
| HT1163       | head and neck                 |
| HT1165       | head and neck                 |
| HT1166       | head and neck                 |
| HT1167       | head and neck                 |
| HT1168       | head and neck                 |
| HT1169       | head and neck                 |
| HT1170       | head and neck                 |
| HT1171       | head and neck                 |
| HT1173       | thyroid                       |
| HT1174       | thyroid                       |
| HT1176       | thyroid                       |
| HT1189       | head and neck                 |
| HT1190       | head and neck                 |
| HT1191       | head and neck                 |
| HT1192       | head and neck                 |
| HT1193       | head and neck                 |
| HT1194       | head and neck                 |
| HT1195       | head and neck                 |
| HT1197       | head and neck                 |
| HT1198       | head and neck                 |
| HT1204       | head and neck                 |
| HT1205       | head and neck                 |
| HT1207       | head and neck                 |
| HT1208       | head and neck                 |

| cDNA Library | Designated Tissue for Library |
|--------------|-------------------------------|
| HT1209       | head and neck                 |
| HT1227       | head and neck                 |
| HT1232       | thyroid                       |
| HT1233       | thyroid                       |
| HT1235       | thyroid                       |
| HT1241       | thyroid                       |
| HT1246       | thyroid                       |
| HT1247       | thyroid                       |
| HT1248       | thyroid                       |
| HT1249       | thyroid                       |
| HT1251       | thyroid                       |
| HT1252       | thyroid                       |
| HT1253       | thyroid                       |
| HT1255       | thyroid                       |
| HT1256       | thyroid                       |
| HT1258       | thyroid                       |
| HT1263       | thyroid                       |
| HT1265       | thyroid                       |
| HT1267       | thyroid                       |
| HT1268       | thyroid                       |
| HT1269       | thyroid                       |
| HT1270       | thyroid                       |
| HT1273       | thyroid                       |
| HT1277       | thyroid                       |
| HT1284       | thyroid                       |
| HT1294       | thyroid                       |
| HT1295       | thyroid                       |
| HT1296       | thyroid                       |
| HT1297       | thyroid                       |
| HT1298       | thyroid                       |
| HT1301       | thyroid                       |
| HT1302       | thyroid                       |
| HT1306       | thyroid                       |
| HT1311       | thyroid                       |
| HT1312       | thyroid                       |
| HT1313       | thyroid                       |
| KN0008       | uncharacterized tissue        |
| KN0014       | uncharacterized tissue        |
| KN0030       | uncharacterized tissue        |
| KN0031       | uncharacterized tissue        |

| cDNA Library | Designated Tissue for Library |
|--------------|-------------------------------|
| KN0033       | uncharacterized tissue        |
| KN0034       | uncharacterized tissue        |
| KN0036       | uncharacterized tissue        |
| LT0005       | uncharacterized tissue        |
| MT0182       | whole blood                   |
| MT0186       | whole blood                   |
| MT0187       | whole blood                   |
| MT0196       | whole blood                   |
| MT0202       | whole blood                   |
| MT0218       | whole blood                   |
| MT0236       | whole blood                   |
| MT0237       | whole blood                   |
| MT0246       | whole blood                   |
| MT0247       | whole blood                   |
| MT0248       | whole blood                   |
| MT0255       | whole blood                   |
| MT0260       | whole blood                   |
| MT0261       | whole blood                   |
| MT0262       | whole blood                   |
| MT0263       | whole blood                   |
| MT0264       | whole blood                   |
| MT0265       | whole blood                   |
| MT0266       | whole blood                   |
| MT0270       | whole blood                   |
| MT0280       | whole blood                   |
| MT0286       | whole blood                   |
| MT0287       | whole blood                   |
| MT0288       | whole blood                   |
| MT0289       | whole blood                   |
| MT0290       | whole blood                   |
| MT0291       | whole blood                   |
| MT0292       | whole blood                   |
| MT0293       | whole blood                   |
| MT0294       | whole blood                   |
| MT0295       | whole blood                   |
| MT0296       | whole blood                   |
| MT0297       | whole blood                   |
| MT0298       | whole blood                   |
| MT0311       | whole blood                   |
| MT0316       | whole blood                   |

| cDNA Library | Designated Tissue for Library |
|--------------|-------------------------------|
| MT0331       | whole blood                   |
| MT0332       | whole blood                   |
| MT0336       | whole blood                   |
| MT0337       | whole blood                   |
| MT0338       | whole blood                   |
| MT0339       | whole blood                   |
| MT0340       | whole blood                   |
| MT0343       | whole blood                   |
| MT0344       | whole blood                   |
| MT0345       | whole blood                   |
| MT0346       | whole blood                   |
| MT0347       | whole blood                   |
| MT0348       | whole blood                   |
| MT0349       | whole blood                   |
| MT0350       | whole blood                   |
| MT0351       | whole blood                   |
| MT0352       | whole blood                   |
| MT0353       | whole blood                   |
| MT0354       | whole blood                   |
| MT0355       | whole blood                   |
| MT0356       | whole blood                   |
| MT0357       | whole blood                   |
| MT0361       | whole blood                   |
| MT0364       | whole blood                   |
| MT0365       | whole blood                   |
| MT0374       | whole blood                   |
| MT0388       | whole blood                   |
| MT0390       | whole blood                   |
| MT0393       | whole blood                   |
| MT0394       | whole blood                   |
| MT0395       | whole blood                   |
| MT0400       | whole blood                   |
| MT0417       | whole blood                   |
| MT0420       | whole blood                   |
| MT0421       | whole blood                   |
| MT0427       | whole blood                   |
| MT0428       | whole blood                   |
| MT0433       | whole blood                   |
| NN0188       | cerebrum                      |
| NN0281       | uncharacterized tissue        |

| cDNA Library | Designated Tissue for Library |
|--------------|-------------------------------|
| NN1197       | brain                         |
| NN2003       | nervous                       |
| NN2004       | brain                         |
| NN2006       | uncharacterized tissue        |
| NT0219       | brain                         |
| NT0224       | brain                         |
| NT0233       | brain                         |
| NT0261       | brain                         |
| NT0263       | brain                         |
| NT0264       | brain                         |
| NT0265       | brain                         |
| NT0266       | brain                         |
| NT0267       | brain                         |
| NT0268       | brain                         |
| NT0269       | brain                         |
| NT0272       | brain                         |
| NT0274       | brain                         |
| NT0278       | brain                         |
| NT0280       | brain                         |
| NT0282       | brain                         |
| NT0283       | brain                         |
| NT0285       | brain                         |
| NT0286       | brain                         |
| NT0287       | brain                         |
| NT0288       | brain                         |
| NT0290       | brain                         |
| NT0291       | brain                         |
| NT0294       | brain                         |
| NT0314       | uncharacterized tissue        |
| NT0319       | uncharacterized tissue        |
| NT0911       | uncharacterized tissue        |
| OT0098       | uncharacterized tissue        |
| OT0099       | uncharacterized tissue        |
| OT0101       | uncharacterized tissue        |
| OT0105       | uncharacterized tissue        |
| OT0106       | uncharacterized tissue        |
| OT0109       | uncharacterized tissue        |
| OT0127       | uncharacterized tissue        |
| OT0129       | uncharacterized tissue        |
| OT0144       | uncharacterized tissue        |

| cDNA Library | Designated Tissue for Library |
|--------------|-------------------------------|
| OT0146       | uncharacterized tissue        |
| OT0159       | uncharacterized tissue        |
| OT0161       | uncharacterized tissue        |
| OT0166       | uncharacterized tissue        |
| OT0167       | uncharacterized tissue        |
| OT0177       | uncharacterized tissue        |
| OT0180       | uncharacterized tissue        |
| OT0185       | uncharacterized tissue        |
| OT0186       | uncharacterized tissue        |
| OT0187       | uncharacterized tissue        |
| OT0188       | uncharacterized tissue        |
| OT0190       | uncharacterized tissue        |
| OT0191       | uncharacterized tissue        |
| OT0196       | uncharacterized tissue        |
| OT0197       | uncharacterized tissue        |
| OT0200       | uncharacterized tissue        |
| OT0201       | uncharacterized tissue        |
| OT0202       | uncharacterized tissue        |
| OT0203       | uncharacterized tissue        |
| OT0204       | uncharacterized tissue        |
| OT0205       | uncharacterized tissue        |
| OT0207       | uncharacterized tissue        |
| OT0211       | uncharacterized tissue        |
| OT0213       | uncharacterized tissue        |
| OT0214       | uncharacterized tissue        |
| OT0215       | uncharacterized tissue        |
| OT0216       | uncharacterized tissue        |
| OT0219       | uncharacterized tissue        |
| RT0026       | kidney                        |
| RT0033       | kidney                        |
| RT0035       | uncharacterized tissue        |
| RT0044       | uncharacterized tissue        |
| RT0045       | kidney                        |
| RT0048       | kidney                        |
| RT0053       | uncharacterized tissue        |
| RT0054       | kidney                        |
| RT0056       | uncharacterized tissue        |
| RT0058       | uncharacterized tissue        |
| RT0061       | uncharacterized tissue        |
| RT0064       | uncharacterized tissue        |

| cDNA Library                                       | Designated Tissue for Library |
|----------------------------------------------------|-------------------------------|
| RT0066                                             | uncharacterized tissue        |
| RT0067                                             | uncharacterized tissue        |
| RT0069                                             | uncharacterized tissue        |
| RT0070                                             | uncharacterized tissue        |
| RT0072                                             | uncharacterized tissue        |
| SN0349                                             | uncharacterized tissue        |
| UT0116                                             | uterus                        |
| UT0117                                             | uterus                        |
| UT0118                                             | uncharacterized tissue        |
| UT0119                                             | uterus                        |
| SAGE_normal_gastric_body_epithelial                | stomach                       |
| SAGE_98-04-P117                                    | uncharacterized tissue        |
| HB0003                                             | uncharacterized tissue        |
| SAGE_normal_pediatic_cortex_H1571                  | cerebrum                      |
| NIH_MGC_114                                        | brain                         |
| NIH_MGC_115                                        | pooled tissue                 |
| NIH_MGC_116                                        | pooled tissue                 |
| NIH_MGC_118                                        | whole blood                   |
| NIH_MGC_119                                        | brain                         |
| NIH_MGC_120                                        | pooled tissue                 |
| NIH_MGC_121                                        | brain                         |
| NIH_MGC_122                                        | pooled tissue                 |
| NIH_MGC_102                                        | salivary gland                |
| SAGE_normal_liver                                  | liver                         |
| SAGE_98-05-P040                                    | uncharacterized tissue        |
| SAGE_ependymoma_1394                               | brain                         |
| SAGE_98-13-P301                                    | uncharacterized tissue        |
| cDNA library of human CD 34+ stem/progenitor cells | uncharacterized tissue        |
| Homo sapiens breast cancer                         | uncharacterized tissue        |
| Homo sapiens library (Geerts D)                    | uncharacterized tissue        |
| Homo sapiens fetal bone marrow                     | uncharacterized tissue        |
| Human Cultured Dermal Papilla Cell cDNA Library    | uncharacterized tissue        |
| Homo sapiens T-cell library (Sugita Y)             | uncharacterized tissue        |
| Homo sapiens E-cell library (Sugita Y)             | uncharacterized tissue        |
| Homo sapiens Mast cell library (Sugita Y)          | uncharacterized tissue        |
| Homo sapiens monocyte library (Sugita Y)           | uncharacterized tissue        |
| Human cell line A431 subclone overexpressing hsp27 | uncharacterized tissue        |
| SAGE_H972                                          | uncharacterized tissue        |
| k562 cell cDNA Library                             | uncharacterized tissue        |
| SAGE_glioma_1150                                   | brain                         |

| cDNA Library                                                                                                                                                                                                                                                                                                                                                                                                                                                                                                                                                                                                                                                                                                                                                                                                                                                                                                                                                                                                                                                                                                                                                                                                                          | Designated Tissue for Library                                                                                                                                                                                                                                                                                                                                                                                                                                                                                                                                                                                                                                                                                                                                                                                                                                                                                                                   |
|---------------------------------------------------------------------------------------------------------------------------------------------------------------------------------------------------------------------------------------------------------------------------------------------------------------------------------------------------------------------------------------------------------------------------------------------------------------------------------------------------------------------------------------------------------------------------------------------------------------------------------------------------------------------------------------------------------------------------------------------------------------------------------------------------------------------------------------------------------------------------------------------------------------------------------------------------------------------------------------------------------------------------------------------------------------------------------------------------------------------------------------------------------------------------------------------------------------------------------------|-------------------------------------------------------------------------------------------------------------------------------------------------------------------------------------------------------------------------------------------------------------------------------------------------------------------------------------------------------------------------------------------------------------------------------------------------------------------------------------------------------------------------------------------------------------------------------------------------------------------------------------------------------------------------------------------------------------------------------------------------------------------------------------------------------------------------------------------------------------------------------------------------------------------------------------------------|
| <p>SAGE_97-05-P312<br/> human HNSCC Library<br/> Human abdominal aortic adventitia from an aneurysm specimen<br/> cDNA Library from human CD34+ stem/progenitor cells<br/> 313 (synonym: hlcc2)<br/> 686 (synonym: hlcc3)<br/> HM3/S3<br/> Human endometrium<br/> SAGE_DL5<br/> SAGE_NORMAL_HEART<br/> SAGE_DL7<br/> SAGE_H1413<br/> NIH_MGC_110<br/> NIH_MGC_111<br/> NIH_MGC_112<br/> Human insulinoma<br/> Human Retinal Pigment Epithelium (2)<br/> Homo sapiens breast cancer-related<br/> Human leukaemia cell U937 cDNA<br/> SAGE_98-09-P558<br/> SAGE_ependymoma239<br/> Human fetal brain cDNA library<br/> Homo sapiens stomach<br/> Dermal Papillae cDNA Library from alopecia areata patient<br/> Human SPRL genes<br/> SAGE_Hemangioma_146<br/> SAGE_Universal_Reference_Human_RNA<br/> NIH_MGC_108<br/> SAGE_H127<br/> Human fetal kidney subtracted cDNA library<br/> Homo sapiens fetal bone marrow mesenchymal stem cells<br/> SAGE_ependymoma_353<br/> Human cancer<br/> Human normal tissue<br/> suppression subtractive hybridization library of human cancer<br/> Homo sapiens SH-SY5Y<br/> Melton Normalized Human Islet 4 N4-HIS 1<br/> Homo sapiens astrocytoma grade 2<br/> SAGE_DCIS-3<br/> SAGE_DCIS-4</p> | <p>uncharacterized tissue<br/> uncharacterized tissue<br/> uncharacterized tissue<br/> uncharacterized tissue<br/> uncharacterized tissue<br/> muscle<br/> muscle<br/> uncharacterized tissue<br/> uncharacterized tissue<br/> uncharacterized tissue<br/> uncharacterized tissue<br/> uncharacterized tissue<br/> mammary gland<br/> uncharacterized tissue<br/> skin<br/> pancreatic islet<br/> retina<br/> uncharacterized tissue<br/> uncharacterized tissue<br/> uncharacterized tissue<br/> brain<br/> uncharacterized tissue<br/> uncharacterized tissue<br/> uncharacterized tissue<br/> uncharacterized tissue<br/> skin<br/> pooled tissue<br/> kidney<br/> brain<br/> uncharacterized tissue<br/> uncharacterized tissue<br/> uncharacterized tissue<br/> uncharacterized tissue<br/> uncharacterized tissue<br/> uncharacterized tissue<br/> pancreatic islet<br/> uncharacterized tissue<br/> mammary gland<br/> mammary gland</p> |

| cDNA Library                                                          | Designated Tissue for Library |
|-----------------------------------------------------------------------|-------------------------------|
| SAGE_DCIS-5                                                           | mammary gland                 |
| SAGE_IDC-3                                                            | mammary gland                 |
| SAGE_IDC-4                                                            | mammary gland                 |
| SAGE_IDC-5                                                            | mammary gland                 |
| Homo sapiens gastric cancer cell line BGC823                          | uncharacterized tissue        |
| SAGE_H408                                                             | uncharacterized tissue        |
| Plasmid subtractive library of human umbilical vein endothelial cells | uncharacterized tissue        |
| SAGE_gastric_cancer-G189                                              | gastrointestinal tract        |
| SAGE_ependymoma_455                                                   | brain                         |
| SAGE_ependymoma_582                                                   | brain                         |
| DDRT-PCR (Li D)                                                       | uncharacterized tissue        |
| SAGE_normal_spinal_cord                                               | nervous                       |
| SAGE_astrocytoma_H388                                                 | uncharacterized tissue        |
| Homo sapiens multiple myeloma                                         | uncharacterized tissue        |
| FIBIP                                                                 | uncharacterized tissue        |
| NIH_MGC_124                                                           | cerebrum                      |
| NIH_MGC_125                                                           | ovary                         |
| SAGE_astrocytoma_H154                                                 | uncharacterized tissue        |
| SAGE_ependymoma_510                                                   | uncharacterized tissue        |
| SAGE_ependymoma_512                                                   | uncharacterized tissue        |
| SAGE_Normal_Human_Bone_Marrow                                         | uncharacterized tissue        |
| Human K562 cells                                                      | uncharacterized tissue        |
| NIH_MGC_101                                                           | lung                          |
| SAGE_Astrocytoma_H272                                                 | uncharacterized tissue        |
| SAGE_ependymoma_580                                                   | uncharacterized tissue        |
| Human Fetal Pancreas 1A                                               | pancreas                      |
| Human Fetal Pancreas 1B                                               | pancreas                      |
| SAGE_Astrocytoma_H970                                                 | uncharacterized tissue        |
| Human fetal hippocampus cDNA library                                  | uncharacterized tissue        |
| adrenal gland (DD-RT-PCR vs PHEO)                                     | uncharacterized tissue        |
| PHEO (DD-RT-PCR vs adrenal gland)                                     | uncharacterized tissue        |
| Homo sapiens S284N                                                    | uncharacterized tissue        |
| Homo sapiens S284T                                                    | uncharacterized tissue        |
| Homo sapiens S285T                                                    | uncharacterized tissue        |
| Homo sapiens pla-801c                                                 | uncharacterized tissue        |
| SAGE_normal_heart                                                     | heart                         |
| NIH_MGC_126                                                           | pooled tissue                 |
| Homo sapiens 1F6                                                      | uncharacterized tissue        |
| NIH_MGC_127                                                           | pooled tissue                 |
| NIH_MGC_128                                                           | pooled tissue                 |

| cDNA Library                                            | Designated Tissue for Library |
|---------------------------------------------------------|-------------------------------|
| cDNA subtractive library of human rectum adenocarcinoma | uncharacterized tissue        |
| Homo sapiens adipose tissue                             | uncharacterized tissue        |
| PN001                                                   | uncharacterized tissue        |
| SAGE-gastric-normal-antrum                              | uncharacterized tissue        |
| SAGE-gastric-cancer-X43                                 | uncharacterized tissue        |
| Expressed sequences from YACs                           | uncharacterized tissue        |
| SAGE_Oligodendroglioma_bulk_1001                        | uncharacterized tissue        |
| Human cutaneous subtractive library                     | uncharacterized tissue        |
| Homo sapiens ATL-derived JuanaW                         | uncharacterized tissue        |
| Homo sapiens HTLV-1-transformed C91-PL                  | uncharacterized tissue        |
| NCI_CGAP_DF0                                            | bone                          |
| NCI_CGAP_DF1                                            | bone                          |
| NCI_CGAP_DH0                                            | uncharacterized tissue        |
| NCI_CGAP_DH1                                            | uncharacterized tissue        |
| NCI_CGAP_DI0                                            | lung                          |
| NCI_CGAP_DT0                                            | uncharacterized tissue        |
| NCI_CGAP_DT1                                            | uncharacterized tissue        |
| NCI_CGAP_ED0                                            | uncharacterized tissue        |
| NCI_CGAP_ED1                                            | uncharacterized tissue        |
| NCI_CGAP_EI0                                            | uncharacterized tissue        |
| NCI_CGAP_EI1                                            | uncharacterized tissue        |
| Homo sapiens blastocyst                                 | uncharacterized tissue        |
| NIH_MGC_109                                             | ovary                         |
| NIH_MGC_107                                             | mammary gland                 |
| UI-E-DW0                                                | eye                           |
| UI-E-CR0                                                | eye                           |
| UI-E-EO1                                                | eye                           |
| UI-E-EO0                                                | eye                           |
| UI-E-DX0                                                | eye                           |
| UI-E-DX1                                                | eye                           |
| UI-E-CQ0                                                | eye                           |
| UI-E-CL0                                                | retina                        |
| UI-E-CR1                                                | eye                           |
| UI-E-CK1                                                | eye                           |
| UI-E-CK0                                                | eye                           |
| UI-E-CQ1                                                | eye                           |
| UI-E-CI1                                                | eye                           |
| UI-E-CI0                                                | retina                        |
| UI-E-DW1                                                | eye                           |
| UI-E-CL1                                                | retina                        |

| cDNA Library                                                                         | Designated Tissue for Library           |
|--------------------------------------------------------------------------------------|-----------------------------------------|
| UI-E-EJ1                                                                             | eye                                     |
| UI-E-EJ0                                                                             | retina                                  |
| S1SNU5                                                                               | stomach                                 |
| S1SNU5s1                                                                             | stomach                                 |
| S1SNU5s2                                                                             | stomach                                 |
| S2SNU668                                                                             | stomach                                 |
| S2SNU668s1                                                                           | stomach                                 |
| S3SNU16                                                                              | stomach                                 |
| S3SNU16s1                                                                            | stomach                                 |
| S4SNU1                                                                               | stomach                                 |
| S4SNU1s1                                                                             | uncharacterized tissue                  |
| S5SNU484                                                                             | stomach                                 |
| S5SNU484s1                                                                           | stomach                                 |
| S6SNU620                                                                             | stomach                                 |
| S6SNU620s1                                                                           | stomach                                 |
| S7SNU719                                                                             | stomach                                 |
| S7SNU719s1                                                                           | stomach                                 |
| S8SNU638                                                                             | stomach                                 |
| S8SNU638s1                                                                           | uncharacterized tissue                  |
| S9SNU601                                                                             | stomach                                 |
| S10SNU1                                                                              | stomach                                 |
| S11SNU1                                                                              | stomach                                 |
| S12SNU216                                                                            | stomach                                 |
| S12SNU216s1                                                                          | uncharacterized tissue                  |
| S13KMS5                                                                              | stomach                                 |
| S13KMS5s1                                                                            | stomach                                 |
| S14K402                                                                              | stomach                                 |
| S14K402s1                                                                            | stomach                                 |
| S15N181907                                                                           | uncharacterized tissue                  |
| S16N667673                                                                           | uncharacterized tissue                  |
| S17N258215                                                                           | stomach                                 |
| S18N669761                                                                           | stomach                                 |
| S19N665307                                                                           | stomach                                 |
| S20T665307                                                                           | stomach                                 |
| S21SNU520                                                                            | stomach                                 |
| S21SNU520s1                                                                          | stomach                                 |
| S22SNU16                                                                             | stomach                                 |
| S22SNU16n1                                                                           | stomach                                 |
| Affymetrix mapping of human transcriptome<br>8 5 week embryo anterior tongue 8 5 EAT | uncharacterized tissue<br>head and neck |

| cDNA Library                                        | Designated Tissue for Library |
|-----------------------------------------------------|-------------------------------|
| Human Trabecular Meshwork cDNA library              | eye                           |
| Homo sapiens gastric cancer                         | uncharacterized tissue        |
| Homo sapiens gastric mucosa                         | uncharacterized tissue        |
| NCI_CGAP_Fs1                                        | uncharacterized tissue        |
| NCI_CGAP_PI1                                        | placenta                      |
| NCI_CGAP_PI2                                        | placenta                      |
| NCI_CGAP_PI3                                        | placenta                      |
| NCI_CGAP_PI4                                        | placenta                      |
| NCI_CGAP_PI5                                        | uncharacterized tissue        |
| NCI_CGAP_PI6                                        | placenta                      |
| NCI_CGAP_PI7                                        | uncharacterized tissue        |
| NCI_CGAP_Car1                                       | uncharacterized tissue        |
| UI-CF-EN1                                           | lung                          |
| UI-CF-EN0                                           | uncharacterized tissue        |
| UI-CF-EC1                                           | lung                          |
| UI-CF-DU1                                           | lung                          |
| Homo sapiens primary mesangial cells                | uncharacterized tissue        |
| Homo sapiens thyroid papillary carcinoma            | uncharacterized tissue        |
| Homo sapiens thyroid adenoma                        | uncharacterized tissue        |
| subtracted library of lung cancer cell              | uncharacterized tissue        |
| Human fetal skeletal muscle subtracted cDNA library | uncharacterized tissue        |
| Homo sapiens clone                                  | uncharacterized tissue        |
| Homo sapiens thyroid                                | uncharacterized tissue        |
| human vestibular cDNA library                       | uncharacterized tissue        |
| Human SW480 Lambda gt11 cDNA Library                | uncharacterized tissue        |
| Subtracted_BTII                                     | uncharacterized tissue        |
| subtractive library of bladder carcinoma            | uncharacterized tissue        |
| NCI_CGAP_Ct1                                        | uncharacterized tissue        |
| NCI_CGAP_Ch1                                        | bone                          |
| upregulated by angiotensin II in mesangial cells    | uncharacterized tissue        |
| pool_AK_lib_v_SPA                                   | uncharacterized tissue        |
| pool_Hela_lib_v_SPE                                 | uncharacterized tissue        |
| pool_AB_lib_v_SPB                                   | uncharacterized tissue        |
| pool_ALU_lib_v_SPA                                  | uncharacterized tissue        |
| pool_AB_lib_v_SPE                                   | uncharacterized tissue        |
| pool_T_lib_v_SPA                                    | uncharacterized tissue        |
| pool_H_lib_v_SPB                                    | uncharacterized tissue        |
| pool_AH_lib_v_SPA                                   | uncharacterized tissue        |
| pool_AK_lib_v_SPC                                   | uncharacterized tissue        |
| pool_T_lib_v_SPE                                    | uncharacterized tissue        |

| cDNA Library        | Designated Tissue for Library |
|---------------------|-------------------------------|
| pool_Hela_lib_v_SPA | uncharacterized tissue        |
| pool_AB_lib_v_SPD   | uncharacterized tissue        |
| pool_BM_lib_v_SPA   | uncharacterized tissue        |
| pool_AH_lib_v_SPC   | uncharacterized tissue        |
| pool_HL_lib_v_SPB   | uncharacterized tissue        |
| pool_T_lib_v_SPB    | uncharacterized tissue        |
| pool_AK_lib_v_SPE   | uncharacterized tissue        |
| pool_AB_lib_v_SPA   | uncharacterized tissue        |
| pool_T_lib_v_SPC    | uncharacterized tissue        |
| pool_Hela_lib_v_SPD | uncharacterized tissue        |
| pool_YT_lib_v_SPD   | uncharacterized tissue        |
| pool_AH_lib_v_SPE   | uncharacterized tissue        |
| pool_HP_B_lib_v_SPE | uncharacterized tissue        |
| pool_HP_B_lib_v_SPA | uncharacterized tissue        |
| pool_YT_lib_v_SPA   | uncharacterized tissue        |
| pool_AK_lib_v_SPD   | uncharacterized tissue        |
| pool_HL_lib_v_SPE   | uncharacterized tissue        |
| pool_FLU_lib_v_SPD  | uncharacterized tissue        |
| pool_H_lib_v_SPC    | uncharacterized tissue        |
| pool_HL_lib_v_SPC   | uncharacterized tissue        |
| pool_HP_B_lib_v_SPC | uncharacterized tissue        |
| pool_FLU_lib_v_SPE  | uncharacterized tissue        |
| pool_AB_lib_v_SPC   | uncharacterized tissue        |
| pool_SK_lib_v_SPB   | uncharacterized tissue        |
| pool_FLU_lib_v_SPA  | uncharacterized tissue        |
| pool_HP_B_lib_v_SPB | uncharacterized tissue        |
| pool_U_lib_v_SPD    | uncharacterized tissue        |
| pool_T_lib_v_SPD    | uncharacterized tissue        |
| pool_FL_lib_v_SPB   | uncharacterized tissue        |
| pool_SK_lib_v_SPD   | uncharacterized tissue        |
| pool_FB_lib_v_SPE   | uncharacterized tissue        |
| pool_AH_lib_v_SPD   | uncharacterized tissue        |
| pool_FB_lib_v_SPB   | uncharacterized tissue        |
| pool_FL_lib_v_SPD   | uncharacterized tissue        |
| pool_AK_lib_v_SPB   | uncharacterized tissue        |
| pool_U_lib_v_SPB    | uncharacterized tissue        |
| pool_Hela_lib_v_SPB | uncharacterized tissue        |
| pool_SK_lib_v_SPE   | uncharacterized tissue        |
| pool_SK_lib_v_SPC   | uncharacterized tissue        |
| pool_H_lib_v_SPD    | uncharacterized tissue        |

| cDNA Library                       | Designated Tissue for Library |
|------------------------------------|-------------------------------|
| pool_FLU_lib_v_SPB                 | uncharacterized tissue        |
| pool_SK_lib_v_SPA                  | uncharacterized tissue        |
| pool_HSI_lib_v_SPE                 | uncharacterized tissue        |
| pool_FB_lib_v_SPC                  | uncharacterized tissue        |
| pool_YT_lib_vec17                  | uncharacterized tissue        |
| pool_YT_lib_vec20                  | uncharacterized tissue        |
| pool_AH_lib_vec14                  | uncharacterized tissue        |
| pool_AK_lib_vec22                  | uncharacterized tissue        |
| pool_AB_lib_vec19                  | uncharacterized tissue        |
| pool_FLU_lib_v_SPC                 | uncharacterized tissue        |
| pool_ALU_lib_v_SPD                 | uncharacterized tissue        |
| pool_FB_lib_v_SPD                  | uncharacterized tissue        |
| pool_U_lib_v_SPA                   | uncharacterized tissue        |
| pool_Hela_lib_v_SPC                | uncharacterized tissue        |
| pool_U_lib_v_SPE                   | uncharacterized tissue        |
| pool_AH_lib_v_SPB                  | uncharacterized tissue        |
| SAGE_Pancreas_carcinoma_CL_ASPC    | pancreas                      |
| SAGE_Pancreas_carcinoma_CL_PL45    | pancreas                      |
| Human lung squamous cell carcinoma | uncharacterized tissue        |
| KN0015                             | uncharacterized tissue        |
| KT0047                             | uncharacterized tissue        |
| HB0025                             | uncharacterized tissue        |
| HB0021                             | uncharacterized tissue        |
| HB0022                             | uncharacterized tissue        |
| HB0013                             | uncharacterized tissue        |
| HB0030                             | uncharacterized tissue        |
| HB0044                             | uncharacterized tissue        |
| HB0039                             | uncharacterized tissue        |
| HB0043                             | uncharacterized tissue        |
| HB0053                             | uncharacterized tissue        |
| HB0040                             | uncharacterized tissue        |
| BT0823                             | uncharacterized tissue        |
| BT2003                             | uncharacterized tissue        |
| BT2504                             | uncharacterized tissue        |
| BT3503                             | uncharacterized tissue        |
| BT3502                             | uncharacterized tissue        |
| BT4001                             | uncharacterized tissue        |
| BT3004                             | uncharacterized tissue        |
| BT2002                             | mammary gland                 |
| BT2000                             | uncharacterized tissue        |

| cDNA Library | Designated Tissue for Library |
|--------------|-------------------------------|
| BT2001       | uncharacterized tissue        |
| BT2501       | uncharacterized tissue        |
| BT2502       | uncharacterized tissue        |
| BT2505       | uncharacterized tissue        |
| BT2004       | uncharacterized tissue        |
| BT2503       | uncharacterized tissue        |
| BT3001       | uncharacterized tissue        |
| BT3000       | uncharacterized tissue        |
| BT3002       | uncharacterized tissue        |
| BT3003       | uncharacterized tissue        |
| BT4505       | uncharacterized tissue        |
| BT4500       | uncharacterized tissue        |
| BT3501       | uncharacterized tissue        |
| BT4502       | uncharacterized tissue        |
| BT4507       | uncharacterized tissue        |
| BT4501       | uncharacterized tissue        |
| BT4000       | uncharacterized tissue        |
| BT4503       | uncharacterized tissue        |
| BT5004       | uncharacterized tissue        |
| BT6007       | uncharacterized tissue        |
| BT5501       | uncharacterized tissue        |
| BT5505       | uncharacterized tissue        |
| BT5508       | uncharacterized tissue        |
| BT5001       | uncharacterized tissue        |
| BT6001       | uncharacterized tissue        |
| BT4508       | uncharacterized tissue        |
| BT6000       | uncharacterized tissue        |
| BT0151       | uncharacterized tissue        |
| BT1000       | uncharacterized tissue        |
| BT6005       | uncharacterized tissue        |
| BN0094       | uncharacterized tissue        |
| CT0549       | uncharacterized tissue        |
| CT0553       | uncharacterized tissue        |
| CT0829       | uncharacterized tissue        |
| CT0839       | uncharacterized tissue        |
| CT0823       | uncharacterized tissue        |
| CT0157       | uncharacterized tissue        |
| CT0821       | uncharacterized tissue        |
| CT0845       | uncharacterized tissue        |
| CT0844       | uncharacterized tissue        |

| cDNA Library | Designated Tissue for Library |
|--------------|-------------------------------|
| CT0848       | uncharacterized tissue        |
| CT0849       | uncharacterized tissue        |
| CT0850       | uncharacterized tissue        |
| CT0830       | uncharacterized tissue        |
| CT0765       | uncharacterized tissue        |
| CT0368       | uncharacterized tissue        |
| CS0004       | uncharacterized tissue        |
| CS0029       | uncharacterized tissue        |
| CI0020       | uncharacterized tissue        |
| CI0036       | uncharacterized tissue        |
| CI0004       | uncharacterized tissue        |
| CI0106       | uncharacterized tissue        |
| CI0104       | uncharacterized tissue        |
| CI0188       | uncharacterized tissue        |
| CI0187       | uncharacterized tissue        |
| CN0194       | uncharacterized tissue        |
| CN0185       | uncharacterized tissue        |
| CN0157       | uncharacterized tissue        |
| CN0193       | uncharacterized tissue        |
| CN0186       | uncharacterized tissue        |
| CN0195       | uncharacterized tissue        |
| CN0170       | uncharacterized tissue        |
| CN0177       | uncharacterized tissue        |
| CN0163       | uncharacterized tissue        |
| CN0192       | uncharacterized tissue        |
| CN0171       | uncharacterized tissue        |
| CN0188       | uncharacterized tissue        |
| CN0190       | uncharacterized tissue        |
| CN0833       | uncharacterized tissue        |
| CN0265       | uncharacterized tissue        |
| CN0152       | uncharacterized tissue        |
| CN0168       | uncharacterized tissue        |
| CN0191       | uncharacterized tissue        |
| CN0203       | uncharacterized tissue        |
| CN0202       | uncharacterized tissue        |
| CN0175       | uncharacterized tissue        |
| CN0204       | uncharacterized tissue        |
| HT0308       | uncharacterized tissue        |
| HT1309       | uncharacterized tissue        |
| HT1196       | uncharacterized tissue        |

| cDNA Library | Designated Tissue for Library |
|--------------|-------------------------------|
| HT1310       | uncharacterized tissue        |
| HT1308       | uncharacterized tissue        |
| HT1245       | uncharacterized tissue        |
| HT1315       | uncharacterized tissue        |
| HT1304       | uncharacterized tissue        |
| HT0624       | uncharacterized tissue        |
| HT0614       | uncharacterized tissue        |
| HN1176       | uncharacterized tissue        |
| HN0142       | uncharacterized tissue        |
| HR1000       | uncharacterized tissue        |
| RT0049       | uncharacterized tissue        |
| RT0081       | uncharacterized tissue        |
| RT0087       | uncharacterized tissue        |
| RT0086       | uncharacterized tissue        |
| ET0278       | uncharacterized tissue        |
| ET0275       | uncharacterized tissue        |
| ET0267       | uncharacterized tissue        |
| ET0261       | uncharacterized tissue        |
| MT0432       | uncharacterized tissue        |
| MT0431       | uncharacterized tissue        |
| MT0426       | uncharacterized tissue        |
| MT0429       | uncharacterized tissue        |
| MT0382       | uncharacterized tissue        |
| MT0405       | uncharacterized tissue        |
| MT0073       | uncharacterized tissue        |
| MT0404       | uncharacterized tissue        |
| MT0425       | uncharacterized tissue        |
| NN0258       | uncharacterized tissue        |
| NN0252       | uncharacterized tissue        |
| NN0256       | uncharacterized tissue        |
| NN0255       | uncharacterized tissue        |
| NN0262       | uncharacterized tissue        |
| NN0261       | uncharacterized tissue        |
| NN0257       | uncharacterized tissue        |
| NN0273       | uncharacterized tissue        |
| NN0253       | uncharacterized tissue        |
| NN0268       | uncharacterized tissue        |
| NN0259       | uncharacterized tissue        |
| NN0267       | uncharacterized tissue        |
| NN0173       | uncharacterized tissue        |

| cDNA Library | Designated Tissue for Library |
|--------------|-------------------------------|
| NN1129       | uncharacterized tissue        |
| NN1131       | uncharacterized tissue        |
| NT0312       | brain                         |
| NT0317       | uncharacterized tissue        |
| OT0237       | uncharacterized tissue        |
| OT0223       | uncharacterized tissue        |
| OT0232       | uncharacterized tissue        |
| OT0199       | uncharacterized tissue        |
| OT0227       | uncharacterized tissue        |
| OT0226       | uncharacterized tissue        |
| OT0236       | uncharacterized tissue        |
| OT0229       | uncharacterized tissue        |
| OT0244       | uncharacterized tissue        |
| OT0245       | uncharacterized tissue        |
| OT0233       | uncharacterized tissue        |
| OT0247       | uncharacterized tissue        |
| OT0251       | uncharacterized tissue        |
| OT0249       | uncharacterized tissue        |
| OT0246       | uncharacterized tissue        |
| OT0250       | uncharacterized tissue        |
| OT0259       | uncharacterized tissue        |
| OT0230       | uncharacterized tissue        |
| GN0098       | uncharacterized tissue        |
| GN0518       | uncharacterized tissue        |
| GN0228       | uncharacterized tissue        |
| GN0517       | uncharacterized tissue        |
| GN0514       | uncharacterized tissue        |
| GN0504       | uncharacterized tissue        |
| GN0510       | uncharacterized tissue        |
| GN0509       | uncharacterized tissue        |
| GN0519       | uncharacterized tissue        |
| GN0308       | uncharacterized tissue        |
| TN0137       | uncharacterized tissue        |
| TN0163       | uncharacterized tissue        |
| TN0185       | uncharacterized tissue        |
| TN0186       | uncharacterized tissue        |
| TN0194       | uncharacterized tissue        |
| TN0205       | uncharacterized tissue        |
| TN0191       | uncharacterized tissue        |
| NCI_CGAP_Ch2 | bone                          |

| cDNA Library                                                | Designated Tissue for Library |
|-------------------------------------------------------------|-------------------------------|
| Differential display of retinoic acid receptor beta cells   | uncharacterized tissue        |
| Human embryo cerebrum cortex                                | uncharacterized tissue        |
| NCI_CGAP_FH0                                                | bone                          |
| NCI_CGAP_FE0                                                | bone                          |
| CFS leukocyte                                               | uncharacterized tissue        |
| Homo sapiens pancreas and fetal brain                       | uncharacterized tissue        |
| Human vestibular cDNA library                               | uncharacterized tissue        |
| Human Retina cDNA (Un-normalized, unamplified): hd/he       | retina                        |
| Homo sapiens library (Kratz CP)                             | uncharacterized tissue        |
| Human Fat Cell 5'-Stretch Plus cDNA Library                 | adipose                       |
| Homo sapiens PCI-O6A; head and neck squamous cell carcinoma | uncharacterized tissue        |
| pool_Dau_lib_v_SPB                                          | uncharacterized tissue        |
| pool_HSI_lib_v_SPA                                          | uncharacterized tissue        |
| pool_U_lib_v_SPC                                            | uncharacterized tissue        |
| T_lib_v_0.5M_pool                                           | uncharacterized tissue        |
| FLU_lib_v_0.5M_pool                                         | uncharacterized tissue        |
| HPB_lib_v_0.5M_pool                                         | uncharacterized tissue        |
| SK_lib_v_0.5M_pool                                          | uncharacterized tissue        |
| AK_lib_v_0.5M_pool                                          | uncharacterized tissue        |
| Hela_lib_v_0.5M_pool                                        | uncharacterized tissue        |
| AH_lib_v_0.5M_pool                                          | uncharacterized tissue        |
| U_lib_v_0.5M_pool                                           | uncharacterized tissue        |
| pool_H_lib_v_SPE                                            | uncharacterized tissue        |
| Homo sapiens library (Ashcroft K)                           | uncharacterized tissue        |
| 727 (synonym: hmcf1)                                        | mammary gland                 |
| SAGE_OVT-7                                                  | ovary                         |
| Schneider fetal brain 00004                                 | brain                         |
| HT0017                                                      | head and neck                 |
| HT0022                                                      | head and neck                 |
| HT0028                                                      | head and neck                 |
| NCI_CGAP_Brn50                                              | brain                         |
| HT0010                                                      | head and neck                 |
| HT0013                                                      | head and neck                 |
| HT0019                                                      | head and neck                 |
| HT0029                                                      | head and neck                 |
| Homo sapiens testis (Singh BN)                              | uncharacterized tissue        |
| Homo sapiens NB4                                            | uncharacterized tissue        |
| SAGE_HMEC-B41                                               | mammary gland                 |
| SAGE_MDA453                                                 | mammary gland                 |
| SAGE_SKBR3                                                  | mammary gland                 |

| cDNA Library | Designated Tissue for Library |
|--------------|-------------------------------|
| BT001        | mammary gland                 |
| BT002        | mammary gland                 |
| BT003        | mammary gland                 |
| BT004        | mammary gland                 |
| BT005        | mammary gland                 |
| BT006        | mammary gland                 |
| BT007        | mammary gland                 |
| BT008        | mammary gland                 |
| BT009        | mammary gland                 |
| BT010        | mammary gland                 |
| BT011        | mammary gland                 |
| BT012        | mammary gland                 |
| BT013        | mammary gland                 |
| BT015        | mammary gland                 |
| BT016        | mammary gland                 |
| BT017        | mammary gland                 |
| BT018        | mammary gland                 |
| BT019        | mammary gland                 |
| BT020        | mammary gland                 |
| BT021        | mammary gland                 |
| BT022        | mammary gland                 |
| BT023        | mammary gland                 |
| BT024        | mammary gland                 |
| BT025        | mammary gland                 |
| BT026        | mammary gland                 |
| BT027        | mammary gland                 |
| BT028        | mammary gland                 |
| BT029        | mammary gland                 |
| BT030        | mammary gland                 |
| BT031        | mammary gland                 |
| BT032        | mammary gland                 |
| BT033        | mammary gland                 |
| BT034        | mammary gland                 |
| BT035        | mammary gland                 |
| BT036        | mammary gland                 |
| BT037        | mammary gland                 |
| BT038        | mammary gland                 |
| BT039        | mammary gland                 |
| BT040        | mammary gland                 |
| BT041        | mammary gland                 |

| cDNA Library | Designated Tissue for Library |
|--------------|-------------------------------|
| BT042        | mammary gland                 |
| BT043        | mammary gland                 |
| BT044        | mammary gland                 |
| BT045        | mammary gland                 |
| BT046        | mammary gland                 |
| BT047        | mammary gland                 |
| BT048        | mammary gland                 |
| BT049        | mammary gland                 |
| BT050        | mammary gland                 |
| BT051        | mammary gland                 |
| BT052        | mammary gland                 |
| BT053        | mammary gland                 |
| BT054        | mammary gland                 |
| BT055        | mammary gland                 |
| BT056        | mammary gland                 |
| BT057        | mammary gland                 |
| BT058        | mammary gland                 |
| BT059        | mammary gland                 |
| BT060        | mammary gland                 |
| BT061        | mammary gland                 |
| BT062        | mammary gland                 |
| BT063        | mammary gland                 |
| BT065        | mammary gland                 |
| BT066        | mammary gland                 |
| BT067        | mammary gland                 |
| BT068        | mammary gland                 |
| BT069        | mammary gland                 |
| BT070        | mammary gland                 |
| BT071        | mammary gland                 |
| BT072        | mammary gland                 |
| BT073        | mammary gland                 |
| BT074        | mammary gland                 |
| BT075        | mammary gland                 |
| BT076        | mammary gland                 |
| BT077        | mammary gland                 |
| BT078        | mammary gland                 |
| BT079        | mammary gland                 |
| BT080        | mammary gland                 |
| BT081        | mammary gland                 |
| BT082        | mammary gland                 |

| cDNA Library | Designated Tissue for Library |
|--------------|-------------------------------|
| BT083        | mammary gland                 |
| BT084        | mammary gland                 |
| BT085        | mammary gland                 |
| BT086        | mammary gland                 |
| BT087        | mammary gland                 |
| BT088        | mammary gland                 |
| BT089        | mammary gland                 |
| BT090        | mammary gland                 |
| BT091        | mammary gland                 |
| BT092        | mammary gland                 |
| BT093        | mammary gland                 |
| BT094        | mammary gland                 |
| BT095        | mammary gland                 |
| BT096        | mammary gland                 |
| BT097        | mammary gland                 |
| BT098        | mammary gland                 |
| BT099        | mammary gland                 |
| BT100        | mammary gland                 |
| BT101        | mammary gland                 |
| BT102        | mammary gland                 |
| BT103        | mammary gland                 |
| BT104        | mammary gland                 |
| BT105        | mammary gland                 |
| BT106        | mammary gland                 |
| BT107        | mammary gland                 |
| BT108        | mammary gland                 |
| BT109        | mammary gland                 |
| BT110        | mammary gland                 |
| BT111        | mammary gland                 |
| BT112        | mammary gland                 |
| BT113        | mammary gland                 |
| BT114        | mammary gland                 |
| BT115        | mammary gland                 |
| BT116        | mammary gland                 |
| BT117        | mammary gland                 |
| BT118        | mammary gland                 |
| BT119        | mammary gland                 |
| BT120        | mammary gland                 |
| BT121        | mammary gland                 |
| BT122        | mammary gland                 |

| cDNA Library | Designated Tissue for Library |
|--------------|-------------------------------|
| BT123        | mammary gland                 |
| BT124        | mammary gland                 |
| BT125        | mammary gland                 |
| BT126        | mammary gland                 |
| BT127        | mammary gland                 |
| BT128        | mammary gland                 |
| BT129        | mammary gland                 |
| BT130        | mammary gland                 |
| BT131        | mammary gland                 |
| BT132        | mammary gland                 |
| BT133        | mammary gland                 |
| BT134        | mammary gland                 |
| BT135        | mammary gland                 |
| BT136        | mammary gland                 |
| BT137        | mammary gland                 |
| BT138        | mammary gland                 |
| BT139        | mammary gland                 |
| BT140        | mammary gland                 |
| BT141        | mammary gland                 |
| BT142        | mammary gland                 |
| BT143        | mammary gland                 |
| BT144        | mammary gland                 |
| BT145        | mammary gland                 |
| BT146        | mammary gland                 |
| BT147        | mammary gland                 |
| BT148        | mammary gland                 |
| BT149        | mammary gland                 |
| BT150        | mammary gland                 |
| BT152        | mammary gland                 |
| BT153        | mammary gland                 |
| BT154        | mammary gland                 |
| BT155        | mammary gland                 |
| BT156        | mammary gland                 |
| BT157        | mammary gland                 |
| BT158        | mammary gland                 |
| BT159        | mammary gland                 |
| BT160        | mammary gland                 |
| BT161        | mammary gland                 |
| BT162        | mammary gland                 |
| BT163        | mammary gland                 |

| cDNA Library | Designated Tissue for Library |
|--------------|-------------------------------|
| BT164        | mammary gland                 |
| BT165        | mammary gland                 |
| BT166        | mammary gland                 |
| BT168        | mammary gland                 |
| BT169        | mammary gland                 |
| BT170        | mammary gland                 |
| BT171        | mammary gland                 |
| BT172        | mammary gland                 |
| BT173        | mammary gland                 |
| BT174        | mammary gland                 |
| BT175        | mammary gland                 |
| BT176        | mammary gland                 |
| BT177        | mammary gland                 |
| BT178        | mammary gland                 |
| BT180        | mammary gland                 |
| BT181        | mammary gland                 |
| BT182        | mammary gland                 |
| BT183        | mammary gland                 |
| BT184        | mammary gland                 |
| BT185        | mammary gland                 |
| BT186        | mammary gland                 |
| BT187        | mammary gland                 |
| BT188        | mammary gland                 |
| BT189        | mammary gland                 |
| BT190        | mammary gland                 |
| BT191        | mammary gland                 |
| BT192        | mammary gland                 |
| BT193        | mammary gland                 |
| BT194        | mammary gland                 |
| BT195        | mammary gland                 |
| BT196        | mammary gland                 |
| BT197        | mammary gland                 |
| BT198        | mammary gland                 |
| BT199        | mammary gland                 |
| BT200        | mammary gland                 |
| BT201        | mammary gland                 |
| BT202        | mammary gland                 |
| BT203        | mammary gland                 |
| BT204        | mammary gland                 |
| BT208        | mammary gland                 |

| cDNA Library                     | Designated Tissue for Library |
|----------------------------------|-------------------------------|
| BT209                            | mammary gland                 |
| BT210                            | mammary gland                 |
| BT211                            | mammary gland                 |
| BT212                            | mammary gland                 |
| BT213                            | mammary gland                 |
| BT214                            | mammary gland                 |
| BT215                            | mammary gland                 |
| BT216                            | mammary gland                 |
| BT217                            | mammary gland                 |
| BT218                            | mammary gland                 |
| BT219                            | mammary gland                 |
| BT220                            | mammary gland                 |
| BT221                            | mammary gland                 |
| BT223                            | mammary gland                 |
| BT224                            | mammary gland                 |
| BT225                            | mammary gland                 |
| BT226                            | mammary gland                 |
| BT228                            | mammary gland                 |
| BT229                            | mammary gland                 |
| BT230                            | mammary gland                 |
| BT232                            | mammary gland                 |
| BT233                            | mammary gland                 |
| BT234                            | mammary gland                 |
| BT235                            | mammary gland                 |
| BT236                            | mammary gland                 |
| BT237                            | mammary gland                 |
| BT238                            | mammary gland                 |
| BT239                            | mammary gland                 |
| BT240                            | mammary gland                 |
| BT241                            | mammary gland                 |
| BT242                            | mammary gland                 |
| BT243                            | mammary gland                 |
| BT244                            | mammary gland                 |
| BT245                            | mammary gland                 |
| BT246                            | mammary gland                 |
| BT247                            | mammary gland                 |
| BT248                            | mammary gland                 |
| BT249                            | mammary gland                 |
| Homo sapiens articular cartilage | uncharacterized tissue        |
| Homo sapiens lung fetus          | uncharacterized tissue        |

| cDNA Library   | Designated Tissue for Library |
|----------------|-------------------------------|
| Daudi lymphoma | uncharacterized tissue        |
| BT0103         | mammary gland                 |
| BT0107         | mammary gland                 |
| BT0220         | mammary gland                 |
| CT0012         | colon                         |
| CT0013         | colon                         |
| CT0015         | colon                         |
| CT0018         | colon                         |
| CT0029         | colon                         |
| CT0030         | colon                         |
| CT0031         | colon                         |
| CT0032         | colon                         |
| CT0033         | colon                         |
| CT0034         | colon                         |
| CT0035         | colon                         |
| CT0036         | colon                         |
| CT0037         | colon                         |
| CT0038         | colon                         |
| CT0039         | colon                         |
| CT0040         | colon                         |
| CT0042         | colon                         |
| CT0044         | colon                         |
| CT0046         | colon                         |
| CT0047         | colon                         |
| CT0048         | colon                         |
| CT0050         | colon                         |
| CT0052         | colon                         |
| CT0054         | colon                         |
| CT0070         | colon                         |
| CT0071         | colon                         |
| CT0075         | colon                         |
| CT0076         | colon                         |
| HT0009         | head and neck                 |
| ST0023         | stomach                       |
| ST0024         | stomach                       |
| ST0027         | stomach                       |
| ST0028         | stomach                       |
| ST0029         | stomach                       |
| ST0039         | stomach                       |
| ST0040         | stomach                       |

| cDNA Library                                   | Designated Tissue for Library |
|------------------------------------------------|-------------------------------|
| ST0043                                         | stomach                       |
| ST0050                                         | stomach                       |
| Homo sapiens HTori-3, control line             | uncharacterized tissue        |
| Homo sapiens HTG9                              | uncharacterized tissue        |
| Homo sapiens HTG8                              | uncharacterized tissue        |
| Homo sapiens HTG13                             | uncharacterized tissue        |
| Homo sapiens HTA4                              | uncharacterized tissue        |
| Homo sapiens HTG2                              | uncharacterized tissue        |
| Lambda gt10 human fetal brain                  | uncharacterized tissue        |
| Homo sapiens library (Hawthorn LA)             | uncharacterized tissue        |
| Homo sapiens milk                              | uncharacterized tissue        |
| Homo sapiens foreskin epidermal newborn        | uncharacterized tissue        |
| Homo sapiens osteosarcoma differential display | uncharacterized tissue        |
| SAGE_Duke_HMVEC                                | vascular                      |
| SAGE_Duke_HMVEC+VEGF                           | vascular                      |
| SAGE_mammary_epithelium                        | mammary gland                 |
| SAGE_DCIS                                      | mammary gland                 |
| SAGE_Duke_757                                  | brain                         |
| SAGE_normal_cerebellum                         | cerebellum                    |
| Homo sapiens larynx adult                      | uncharacterized tissue        |
| Homo sapiens astrocytoma library               | uncharacterized tissue        |
| Homo sapiens non-tumorigenic library           | uncharacterized tissue        |
| Homo sapiens glioblastoma library              | uncharacterized tissue        |
| Homo sapiens library (Scherer SW)              | uncharacterized tissue        |
| NCI_CGAP_Co22                                  | colon                         |
| NCI_CGAP_Lu34                                  | lung                          |
| NCI_CGAP_Ov39                                  | ovary                         |
| NCI_CGAP_Ov40                                  | ovary                         |
| Homo sapiens liver fetus                       | uncharacterized tissue        |
| U937                                           | uncharacterized tissue        |
| Homo sapiens muscle adult                      | uncharacterized tissue        |
| Homo sapiens differential display PCR (Xian B) | uncharacterized tissue        |
| Homo sapiens ATCC SW1088                       | uncharacterized tissue        |
| NCI_CGAP_HN7                                   | head and neck                 |
| NCI_CGAP_HN8                                   | head and neck                 |
| NCI_CGAP_HN9                                   | head and neck                 |
| NCI_CGAP_HN10                                  | head and neck                 |
| NCI_CGAP_HN12                                  | head and neck                 |
| SAGE_OVT-8                                     | ovary                         |
| NCI_CGAP_Sub1                                  | uncharacterized tissue        |

| cDNA Library                                  | Designated Tissue for Library |
|-----------------------------------------------|-------------------------------|
| NCI_CGAP_Sub2                                 | uncharacterized tissue        |
| Synovial fibroblasts, rheumatoid arthritis    | uncharacterized tissue        |
| prostate cancer cell line LNCaP               | uncharacterized tissue        |
| Homo sapiens cell line K562 cDNA Library      | uncharacterized tissue        |
| Homo sapiens library (Jangbo Y)               | uncharacterized tissue        |
| Lambda gt10 human adult liver                 | uncharacterized tissue        |
| 18p11 cDNA selection library                  | uncharacterized tissue        |
| SAGE_Duke_96-349                              | mammary gland                 |
| SAGE_Duke_40N                                 | mammary gland                 |
| SAGE_Duke_48N                                 | mammary gland                 |
| NCI_CGAP_Lu34.1                               | uncharacterized tissue        |
| SAGE_A2780-9                                  | ovary                         |
| Soares_NHCe_cervix                            | cervix                        |
| Soares_NHCeC_cervical_tumor                   | cervix                        |
| Homo sapiens 530 melanoma                     | uncharacterized tissue        |
| Homo sapiens MV3 melanoma                     | uncharacterized tissue        |
| BT000                                         | mammary gland                 |
| Homo sapiens EB1                              | uncharacterized tissue        |
| normal muscle cDNA subtractive library        | uncharacterized tissue        |
| FSHD affected muscle cDNA subtractive library | uncharacterized tissue        |
| NCI_CGAP_HN11                                 | head and neck                 |
| 761 (synonym: hamy2)                          | brain                         |
| 762 (synonym: hmel2)                          | skin                          |
| UPC15                                         | uncharacterized tissue        |
| DNC15                                         | whole blood                   |
| NCI_CGAP_Li8                                  | liver                         |
| NCI_CGAP_Lu21                                 | lung                          |
| Homo sapiens colon carcinoma                  | uncharacterized tissue        |
| SAGE_ML10-10                                  | ovary                         |
| BT0081                                        | mammary gland                 |
| BT0163                                        | mammary gland                 |
| BT0168                                        | mammary gland                 |
| BT0169                                        | mammary gland                 |
| BT0229                                        | mammary gland                 |
| BT0234                                        | mammary gland                 |
| CT0002                                        | colon                         |
| CT0003                                        | colon                         |
| CT0004                                        | colon                         |
| CT0005                                        | colon                         |
| CT0016                                        | colon                         |

| cDNA Library                                    | Designated Tissue for Library |
|-------------------------------------------------|-------------------------------|
| CT0041                                          | colon                         |
| CT0060                                          | colon                         |
| CT0062                                          | colon                         |
| CT0064                                          | colon                         |
| CT0065                                          | colon                         |
| CT0069                                          | colon                         |
| CT0077                                          | colon                         |
| CT0078                                          | colon                         |
| CT0079                                          | colon                         |
| CT0080                                          | colon                         |
| CT0081                                          | colon                         |
| CT0082                                          | colon                         |
| CT0083                                          | colon                         |
| CT0088                                          | colon                         |
| CT0090                                          | colon                         |
| CT0092                                          | colon                         |
| CT0100                                          | colon                         |
| CT0101                                          | colon                         |
| CT0103                                          | colon                         |
| CT0104                                          | colon                         |
| CT0105                                          | colon                         |
| HT0026                                          | head and neck                 |
| HT0027                                          | head and neck                 |
| ST0018                                          | stomach                       |
| ST0020                                          | stomach                       |
| ST0031                                          | stomach                       |
| ST0041                                          | stomach                       |
| ST0056                                          | stomach                       |
| PT-PCR products                                 | uncharacterized tissue        |
| human ovarian cancer cDNA                       | uncharacterized tissue        |
| KRIBB Human TN intrathymic T-cell cDNA library  | uncharacterized tissue        |
| KRIBB Human DP intrathymic T-cell cDNA library  | uncharacterized tissue        |
| KRIBB Human CD4 intrathymic T-cell cDNA library | uncharacterized tissue        |
| RT-PCR products human melanoma                  | uncharacterized tissue        |
| NEUROBLASTOMA MYCN                              | uncharacterized tissue        |
| hEx1 library                                    | uncharacterized tissue        |
| Homo sapiens skov                               | uncharacterized tissue        |
| Homo sapiens CGL3                               | uncharacterized tissue        |
| NIH_MGC_71                                      | Uterus                        |

| cDNA Library | Tissue Category |
|--------------|-----------------|
| NIH_MGC_56   | Brain           |
| NIH_MGC_87   | Breast          |
| NIH_MGC_12   | Cervix          |
| NIH_MGC_116  | Colon           |
| NIH_MGC_15   | Colon           |
| NIH_MGC_65   | Colon           |
| NIH_MGC_88   | Duodenum        |
| NIH_MGC_43   | Eye             |
| NIH_MGC_16   | Eye             |
| NIH_MGC_67   | Eye             |
| NIH_MGC_74   | Heart           |
| NIH_MGC_75   | Kidney          |
| NIH_MGC_58   | Kidney          |
| NIH_MGC_89   | Kidney          |
| NIH_MGC_45   | Kidney          |
| NIH_MGC_14   | Kidney          |
| NIH_MGC_76   | Liver           |
| NIH_MGC_90   | Liver           |
| NIH_MGC_100  | Liver           |
| NIH_MGC_77   | Lung            |
| NIH_MGC_122  | Lung            |
| NIH_MGC_69   | Lung            |
| NIH_MGC_18   | Lung            |
| NIH_MGC_68   | Lung            |
| NIH_MGC_59   | Lung            |
| NIH_MGC_7    | Lung            |
| NIH_MGC_8    | Lymph           |
| NIH_MGC_85   | Lymph           |
| NIH_MGC_99   | Lymph           |
| NIH_MGC_17   | Muscle          |
| NIH_MGC_66   | Ovary           |
| NIH_MGC_9    | Ovary           |
| NIH_MGC_125  | Ovary           |
| NIH_MGC_78   | Pancreas        |
| NIH_MGC_120  | Pancreas        |
| NIH_MGC_39   | Pancreas        |
| NIH_MGC_110  | Pancreas        |
| NIH_MGC_42   | Pancreas        |
| NIH_MGC_70   | Pancreas        |
| NIH_MGC_79   | Placenta        |
| NIH_MGC_10   | Placenta        |

| cDNA Library  | Tissue Category |
|---------------|-----------------|
| NIH_MGC_21    | Placenta        |
| NIH_MGC_48    | Primary         |
| NIH_MGC_83    | Prostate        |
| NIH_MGC_60    | Prostate        |
| NIH_MGC_91    | Prostate        |
| NIH_MGC_40    | Prostate        |
| NIH_MGC_81    | Skeletal        |
| NIH_MGC_41    | Skin            |
| NIH_MGC_112   | Skin            |
| NIH_MGC_49    | Skin            |
| NIH_MGC_62    | Skin            |
| NIH_MGC_20    | Skin            |
| NIH_MGC_72    | Skin            |
| NCI_CGAP_Skn3 | Skin            |
| NCI_CGAP_Skn4 | Skin            |
| NIH_MGC_113   | Spleen          |
| NIH_MGC_82    | Testis          |
| NIH_MGC_97    | Testis          |
| NIH_MGC_61    | Testis          |
| NIH_MGC_92    | Testis          |
| NIH_MGC_44    | Uterus          |
| NIH_MGC_46    | Uterus          |
| NIH_MGC_71    | Uterus          |
| NIH_MGC_84    | Adrenal gland   |
| NIH_MGC_36    | B-cell          |
| NIH_MGC_37    | B-cell          |
| NIH_MGC_38    | B-cell          |
| NIH_MGC_48    | B-cell          |
| NIH_MGC_50    | B-cell          |
| NIH_MGC_51    | B-cell          |
| NIH_MGC_52    | B-cell          |
| NIH_MGC_53    | Bladder         |
| NIH_MGC_93    | Bladder         |
| NIH_MGC_2     | Blood           |
| NIH_MGC_106   | Blood           |
| NIH_MGC_86    | Bone            |
| NIH_MGC_54    | Bone marrow     |
| NIH_MGC_55    | Bone marrow     |
| NIH_MGC_19    | Brain/CNS       |
| NIH_MGC_47    | Brain/CNS       |
| NIH_MGC_56    | Brain/CNS       |

| cDNA Library | Tissue Category |
|--------------|-----------------|
| NIH_MGC_57   | Brain/CNS       |
| NIH_MGC_73   | Brain/CNS       |
| NIH_MGC_95   | Brain/CNS       |
| NIH_MGC_96   | Brain/CNS       |
| NIH_MGC_98   | Brain/CNS       |
| NIH_MGC_114  | Brain/CNS       |
| NIH_MGC_119  | Brain/CNS       |
| NIH_MGC_121  | Brain/CNS       |
| NIH_MGC_124  | Brain/CNS       |
| NIH_MGC_87   | Breast          |
| NIH_MGC_107  | Breast          |
| NIH_MGC_4    | Cervix          |
| NIH_MGC_5    | Cervix          |
| NIH_MGC_12   | Cervix          |
| NIH_MGC_35   | Cervix          |
| NIH_MGC_64   | Cervix          |
| NIH_MGC_15   | Colon           |
| NIH_MGC_65   | Colon           |
| NIH_MGC_16   | Eye             |
| NIH_MGC_43   | Eye             |
| NIH_MGC_67   | Eye             |
| NIH_MGC_102  | Head/neck       |
| NIH_MGC_74   | Heart           |
| NIH_MGC_14   | Kidney          |
| NIH_MGC_45   | Kidney          |
| NIH_MGC_58   | Kidney          |
| NIH_MGC_75   | Kidney          |
| NIH_MGC_89   | Kidney          |
| NIH_MGC_108  | Kidney          |
| NIH_MGC_118  | Leukocyte       |
| NIH_MGC_76   | Liver           |
| NIH_MGC_90   | Liver           |
| NIH_MGC_100  | Liver           |
| NIH_MGC_7    | Lung            |
| NIH_MGC_18   | Lung            |
| NIH_MGC_59   | Lung            |
| NIH_MGC_68   | Lung            |
| NIH_MGC_69   | Lung            |
| NIH_MGC_77   | Lung            |
| NIH_MGC_101  | Lung            |
| NIH_MGC_3    | Lymph           |

| cDNA Library | Tissue Category |
|--------------|-----------------|
| NIH_MGC_8    | Lymph           |
| NIH_MGC_63   | Lymph           |
| NIH_MGC_85   | Lymph           |
| NIH_MGC_99   | Lymph           |
| NIH_MGC_17   | Muscle          |
| NIH_MGC_81   | Muscle          |
| NIH_MGC_9    | Ovary           |
| NIH_MGC_66   | Ovary           |
| NIH_MGC_109  | Ovary           |
| NIH_MGC_125  | Ovary           |
| NIH_MGC_39   | Pancreas        |
| NIH_MGC_42   | Pancreas        |
| NIH_MGC_70   | Pancreas        |
| NIH_MGC_78   | Pancreas        |
| NIH_MGC_110  | Pancreas        |
| NIH_MGC_10   | Placenta        |
| NIH_MGC_21   | Placenta        |
| NIH_MGC_79   | Placenta        |
| NIH_MGC_147  | Placenta        |
| NIH_MGC_115  | Pooled          |
| NIH_MGC_116  | Pooled          |
| NIH_MGC_120  | Pooled          |
| NIH_MGC_122  | Pooled          |
| NIH_MGC_123  | Pooled          |
| NIH_MGC_126  | Pooled          |
| NIH_MGC_127  | Pooled          |
| NIH_MGC_128  | Pooled          |
| NIH_MGC_141  | Pooled          |
| NIH_MGC_142  | Pooled          |
| NIH_MGC_146  | Pooled          |
| NIH_MGC_40   | Prostate        |
| NIH_MGC_60   | Prostate        |
| NIH_MGC_83   | Prostate        |
| NIH_MGC_91   | Prostate        |
| NIH_MGC_111  | Prostate        |
| NIH_MGC_20   | Skin            |
| NIH_MGC_41   | Skin            |
| NIH_MGC_49   | Skin            |
| NIH_MGC_62   | Skin            |
| NIH_MGC_72   | Skin            |
| NIH_MGC_112  | Skin            |

| cDNA Library   | Designated Tissue for Library |
|----------------|-------------------------------|
| NIH_MGC_84     | Adrenal cortex, carcinoma     |
| NIH_MGC_84     | Adrenal                       |
| NIH_MGC_53     | Bladder                       |
| NIH_MGC_93     | Bladder                       |
| NIH_MGC_118    | Blood                         |
| NIH_MGC_106    | Blood                         |
| NIH_MGC_55     | Bone                          |
| NIH_MGC_54     | Bone                          |
| NIH_MGC_86     | Bone                          |
| NIH_MGC_73     | Brain                         |
| NIH_MGC_115    | Brain                         |
| NIH_MGC_119    | Brain                         |
| NIH_MGC_114    | Brain                         |
| NCI_CGAP_Brn67 | Brain                         |
| NIH_MGC_98     | Brain                         |
| NIH_MGC_121    | Brain                         |
| NIH_MGC_57     | Brain                         |
| NCI_CGAP_Brn64 | Brain                         |
| NIH_MGC_124    | Brain                         |
| NIH_MGC_95     | Brain                         |
| NIH_MGC_96     | Brain                         |
| NIH_MGC_19     | Brain                         |
| NIH_MGC_47     | Brain                         |
| NIH_MGC_88     | Small intestine               |
| NIH_MGC_113    | Spleen                        |
| NIH_MGC_61     | Testis                        |
| NIH_MGC_82     | Testis                        |
| NIH_MGC_92     | Testis                        |
| NIH_MGC_97     | Testis                        |
| NIH_MGC_44     | Uterus                        |
| NIH_MGC_46     | Uterus                        |
