# Supplementary material for: Variation in alternative splicing across human tissues
Source: PubMed Central journal article supplement (PMC545594; doi:10.1186/gb-2004-5-10-r74), 2004-09-13

**Figure S2.** The average length in bases of ESTs stringently aligned to gene regions across tissues. Error bars are 1 standard deviation.

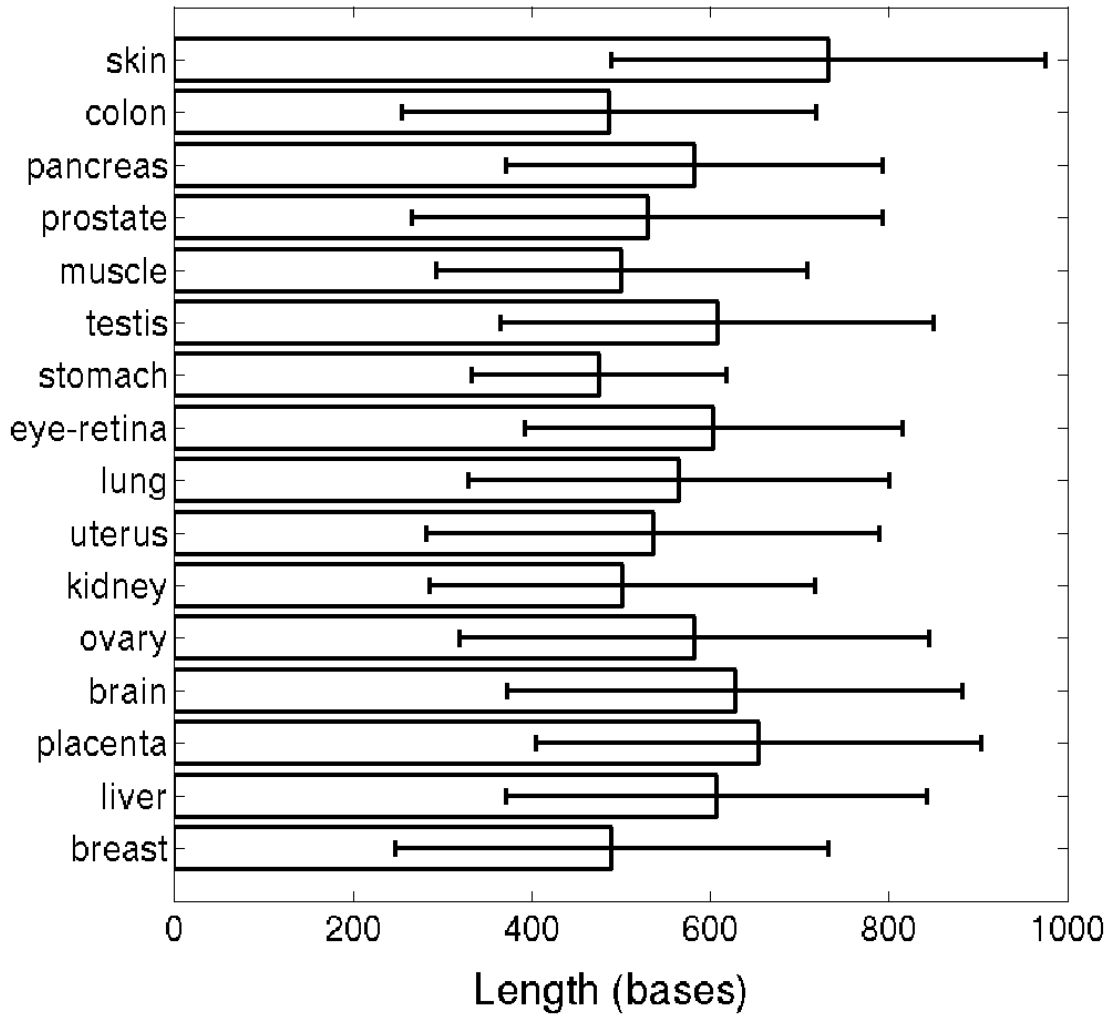

Supplement: gb-2004-5-10-r74-s6.pdf [file gb-2004-5-10-r74-s6.pdf]
